# Supplementary material for: Mild and selective hydrogenation of aromatic and aliphatic (di)nitriles with a well-defined iron pincer complex
Source: Springer Nature journal article supplement (doi:10.1038/ncomms5111), 2014-06-27
Supplement: 41467_2014_BFncomms5111_MOESM890_ESM.pdf [file 41467_2014_BFncomms5111_MOESM890_ESM.pdf]

# 1. Supplementary Figures

## 1.1 Reaction profile

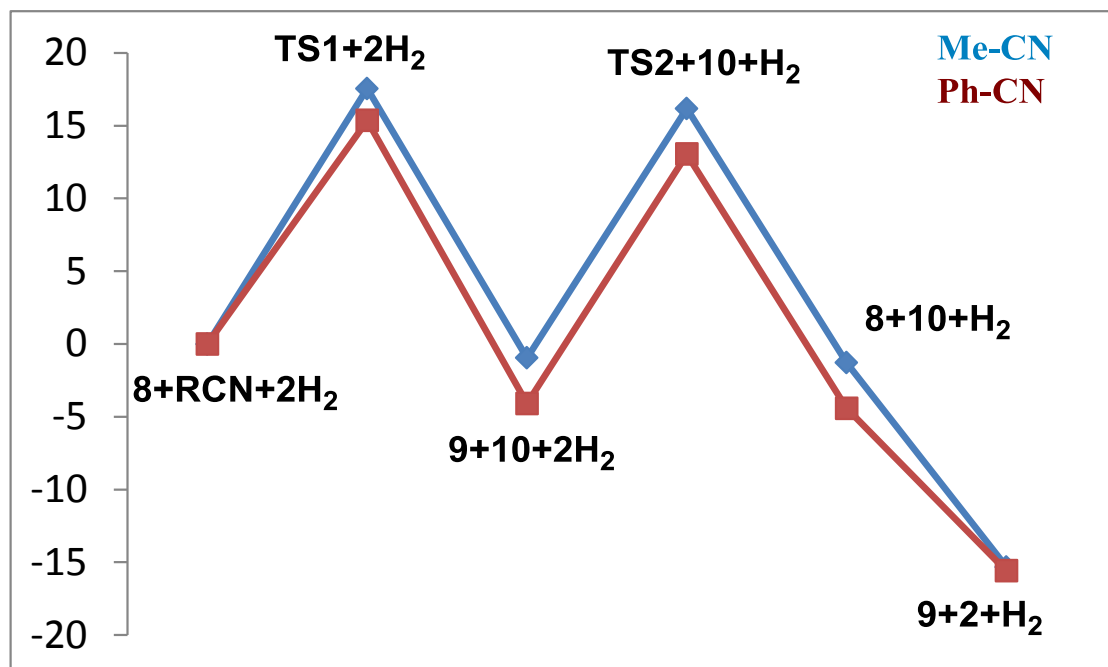

Supplementary Figure 1. Reaction profile for nitrile hydrogenation (kcal/mol).

## 1.2 IR spectra

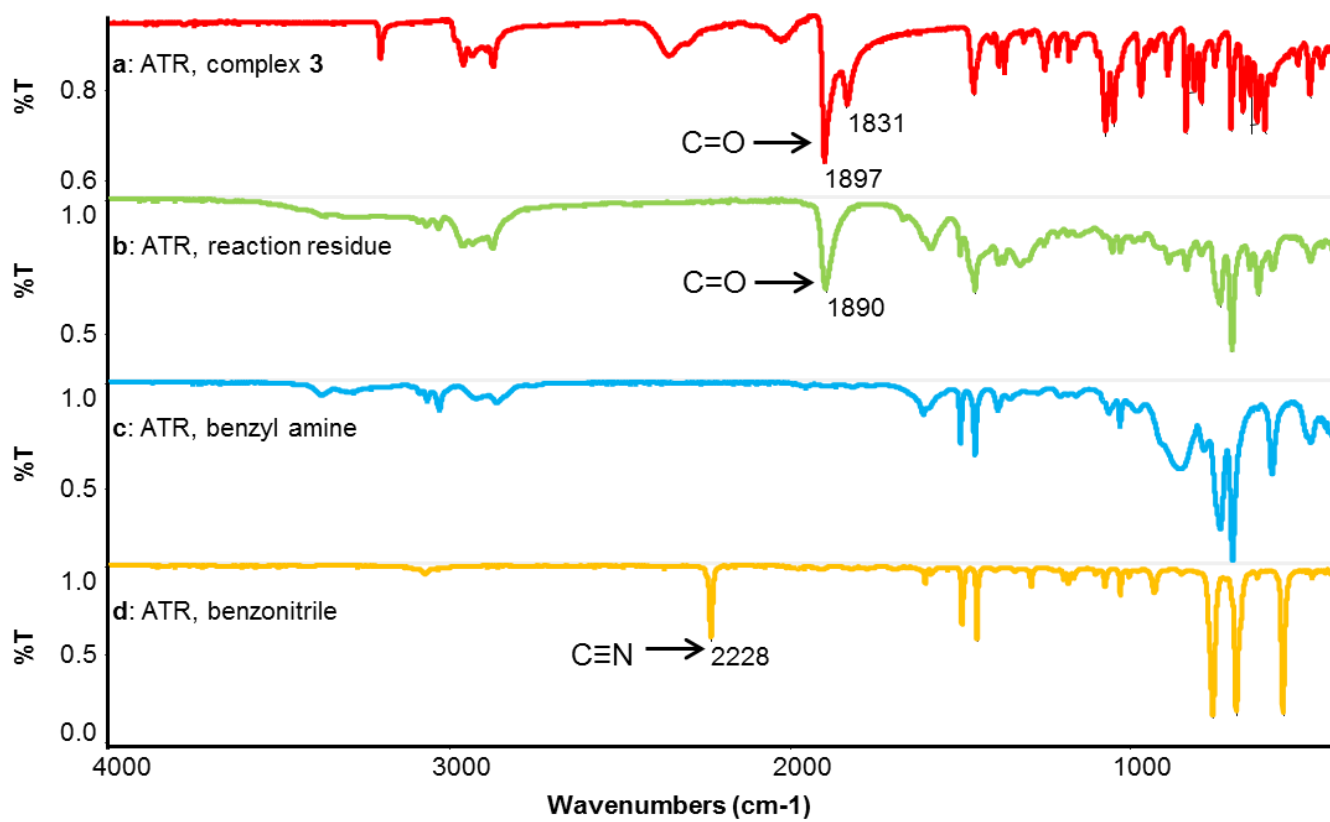

**Supplementary Figure 2.** ATR-FTIR measurement: a) complex **3**, without solvent; b) reaction residue; c) benzyl amine, pure; d) benzonitrile, pure.

### 1.3 NMR spectra of Me-3 and intermediates

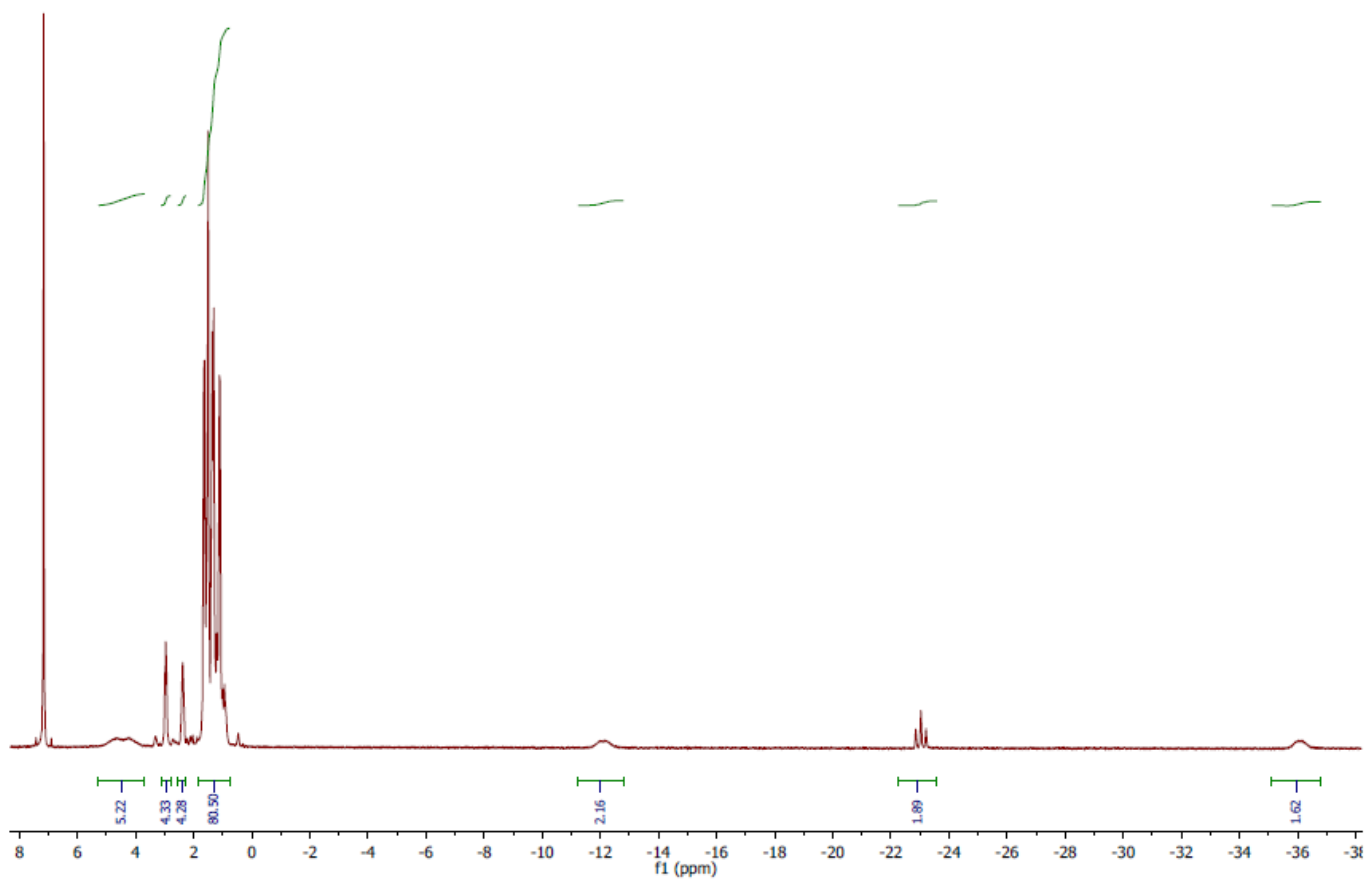

**Supplementary Figure 3a.**  $^1\text{H}$  NMR (300.1 MHz) spectrum of  $\{\text{Fe}(\text{H})(\text{HBH}_3)[(\text{CH}_3)\text{N}((\text{CH}_2\text{CH}_2)\text{P}(\text{CH}(\text{CH}_3)_2)_2)_2]\}$  (**Me-3**, without CO),  $\text{C}_6\text{D}_6$ .

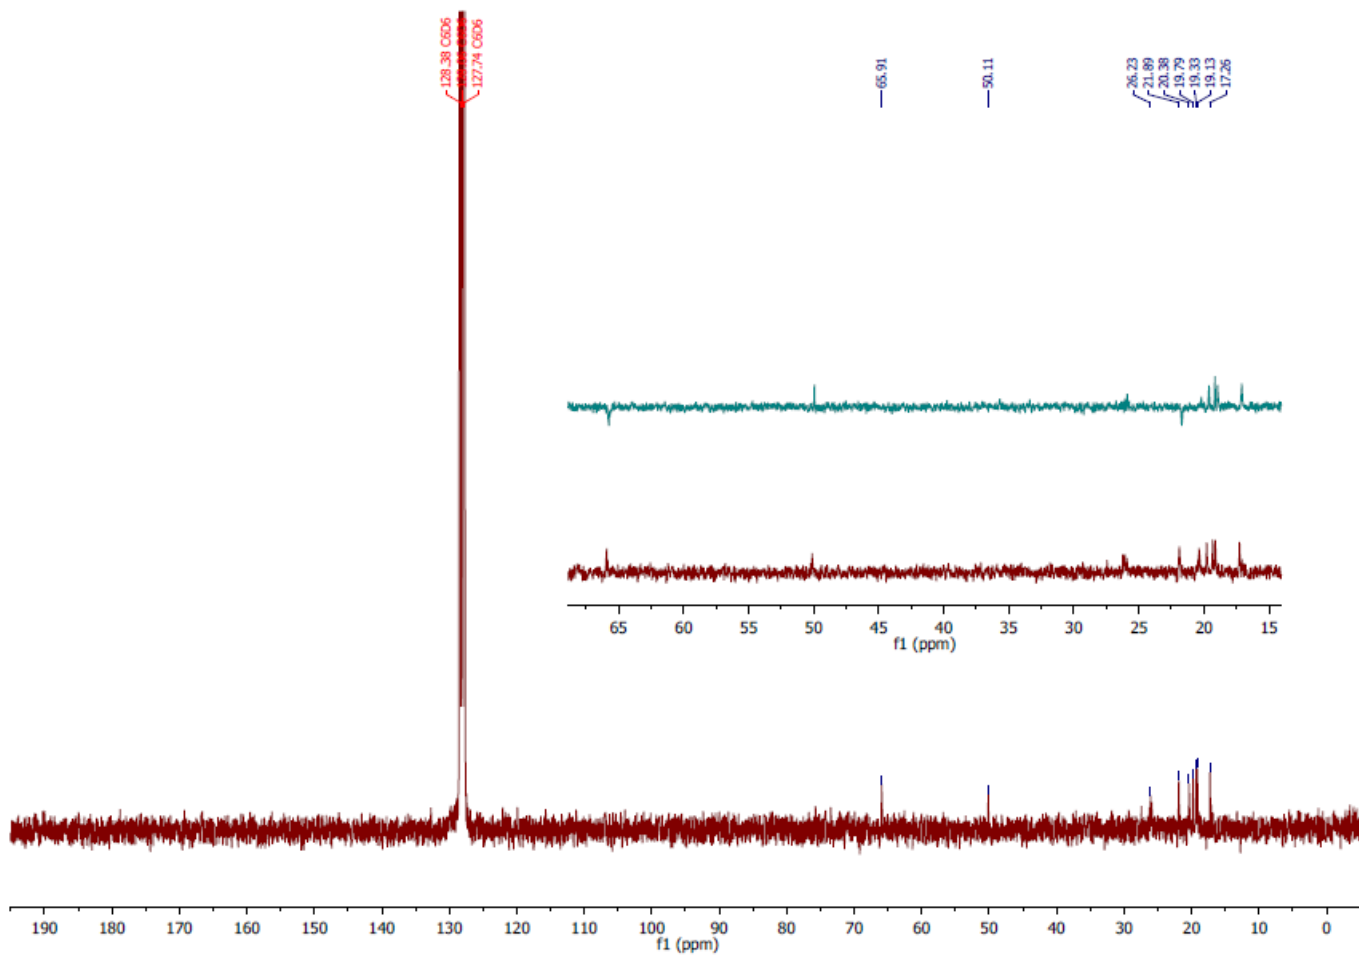

**Supplementary Figure 3b.**  $^{13}\text{C}$  (DEPT) NMR (75.5 MHz) spectra of  $\{\text{Fe}(\text{H})(\text{HBH}_3)[(\text{CH}_3)\text{N}((\text{CH}_2\text{CH}_2)\text{P}(\text{CH}(\text{CH}_3)_2)_2)_2]\}$  (**Me-3** without CO),  $\text{C}_6\text{D}_6$ .

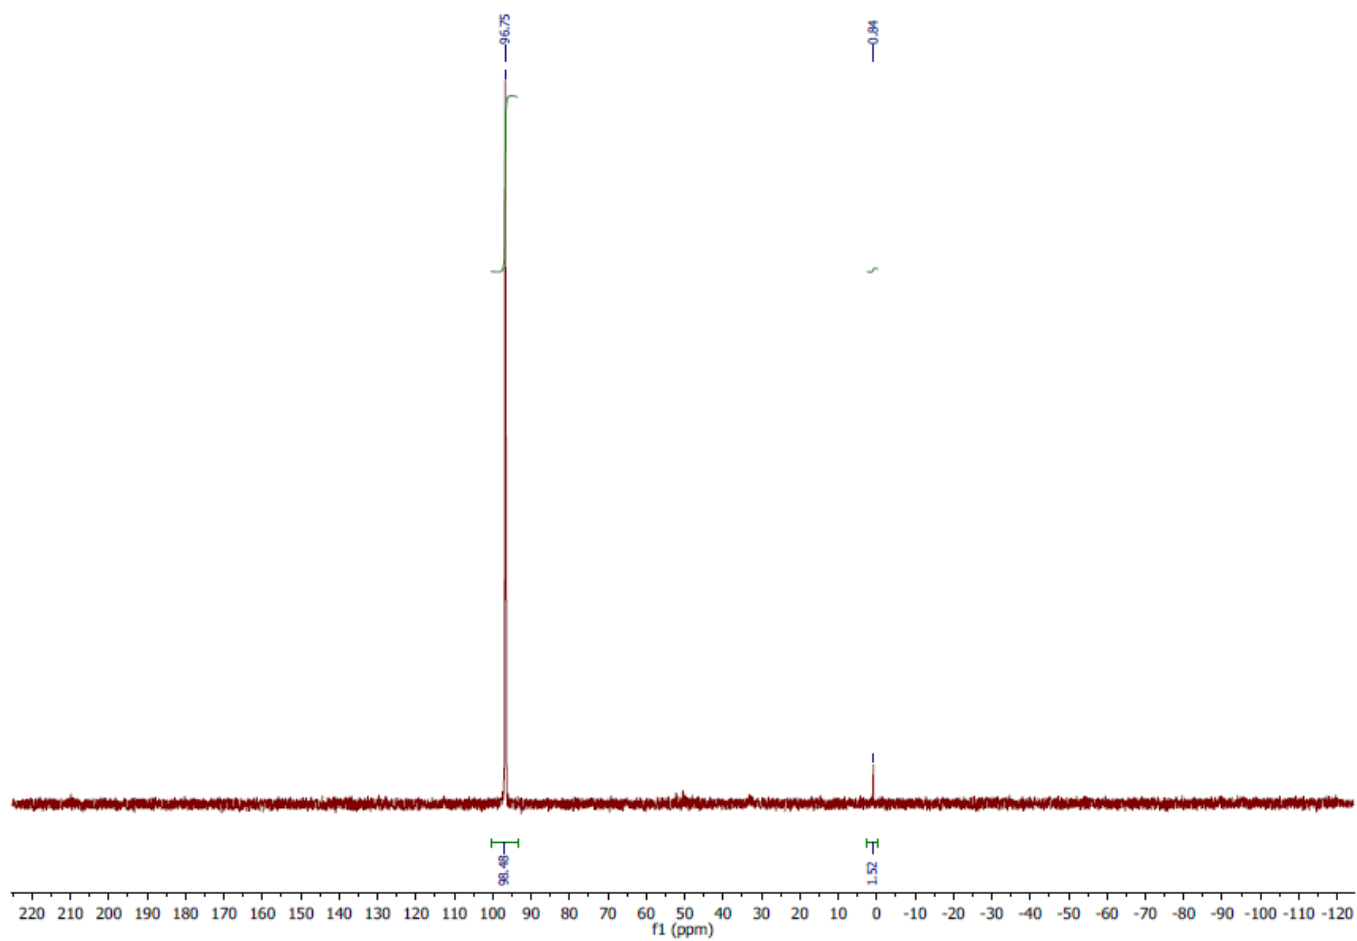

**Supplementary Figure 3c.**  $^{31}\text{P}\{^1\text{H}\}$  NMR (121.0 MHz) spectrum of  $[(\text{CH}_3)\text{N}((\text{CH}_2\text{CH}_2)\text{P}(\text{CH}(\text{CH}_3)_2)_2)_2]$  (**Me-3**, without CO),  $\text{C}_6\text{D}_6$ . The minor peak is due to free ligand  $[(\text{CH}_3)\text{N}((\text{CH}_2\text{CH}_2)\text{P}(\text{CH}(\text{CH}_3)_2)_2)_2]$ .

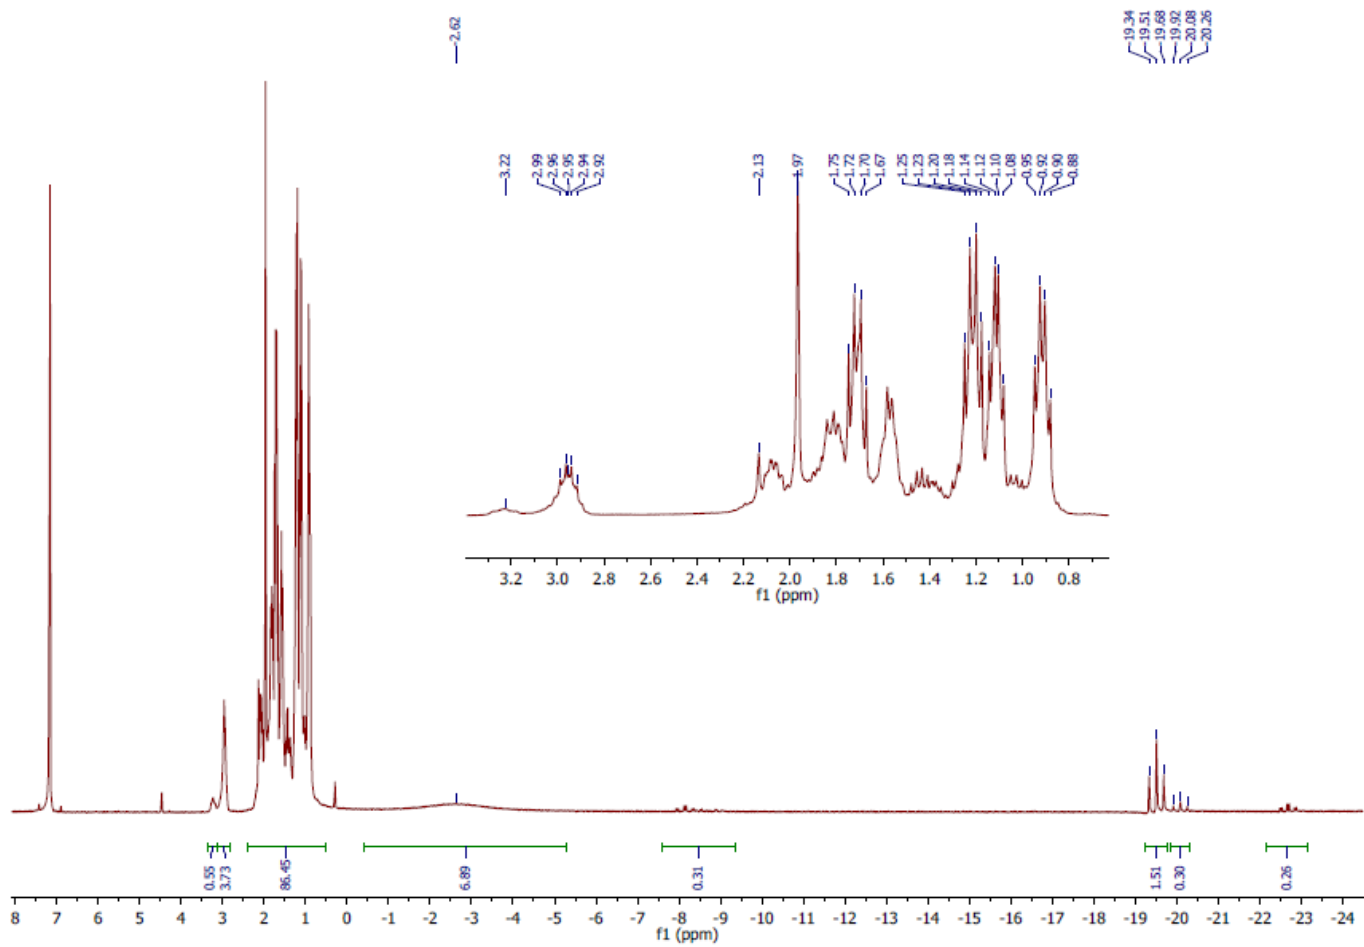

**Supplementary Figure 3d.**  $^1\text{H}$  NMR (300 .1MHz) spectrum of  $\{\text{Fe}(\text{H})(\text{HB}_3)(\text{CO})[(\text{CH}_3)\text{N}((\text{CH}_2\text{CH}_2)\text{P}(\text{CH}(\text{CH}_3)_2)_2)_2]\}$  (Me-3),  $\text{C}_6\text{D}_6$ .

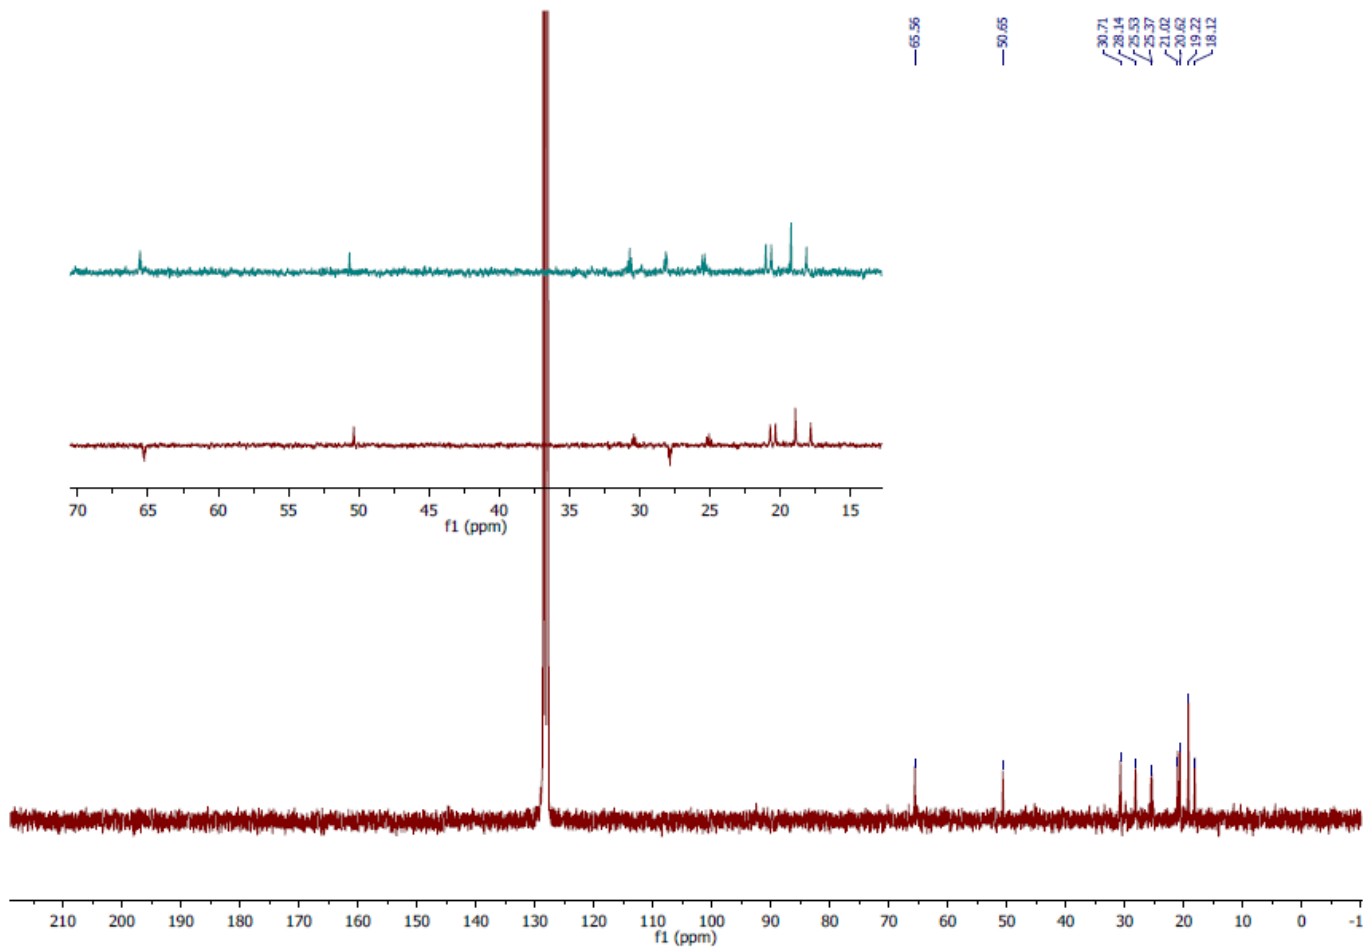

**Supplementary Figure 3e.**  $^{13}\text{C}$  (DEPT) NMR (75.5 MHz) spectra of  $\{\text{Fe}(\text{H})(\text{HBH}_3)(\text{CO})[(\text{CH}_3)\text{N}((\text{CH}_2\text{CH}_2)\text{P}(\text{CH}(\text{CH}_3)_2)_2)_2]\}$  (**Me-3**),  $\text{C}_6\text{D}_6$ .

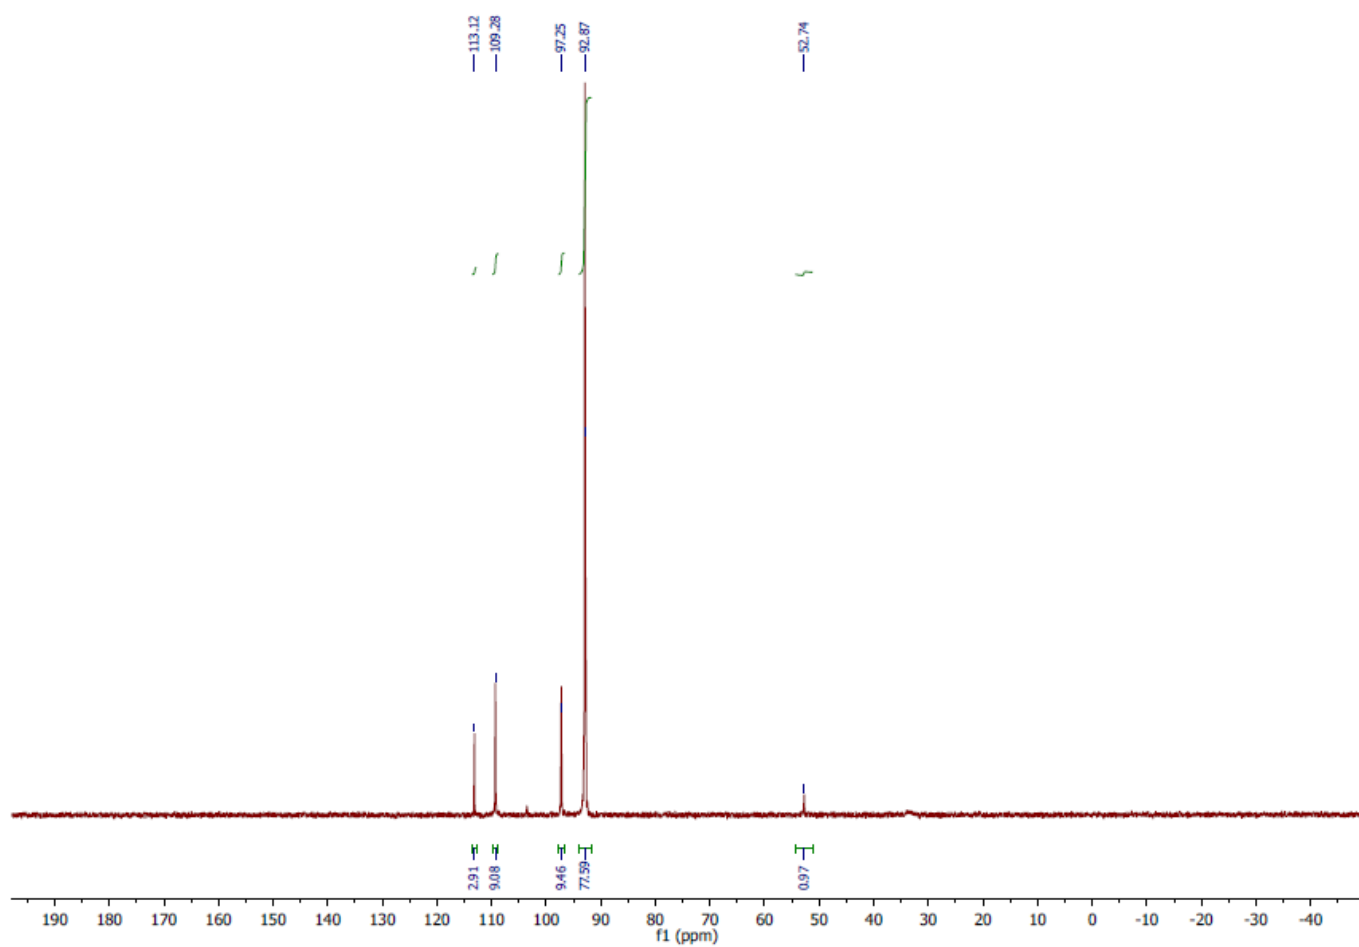

**Supplementary Figure 3f.**  $^{31}\text{P}\{^1\text{H}\}$  NMR (121.0 MHz) spectrum of  $\{\text{Fe}(\text{H})(\text{HBH}_3)(\text{CO})[(\text{CH}_3)\text{N}((\text{CH}_2\text{CH}_2)\text{P}(\text{CH}(\text{CH}_3)_2)_2)_2]\}$  (**Me-3**),  $\text{C}_6\text{D}_6$ . Peak at 52.7 ppm is due to oxidised free ligand.



## 1.4 Detection of species 8 and 9 under catalytic-like conditions

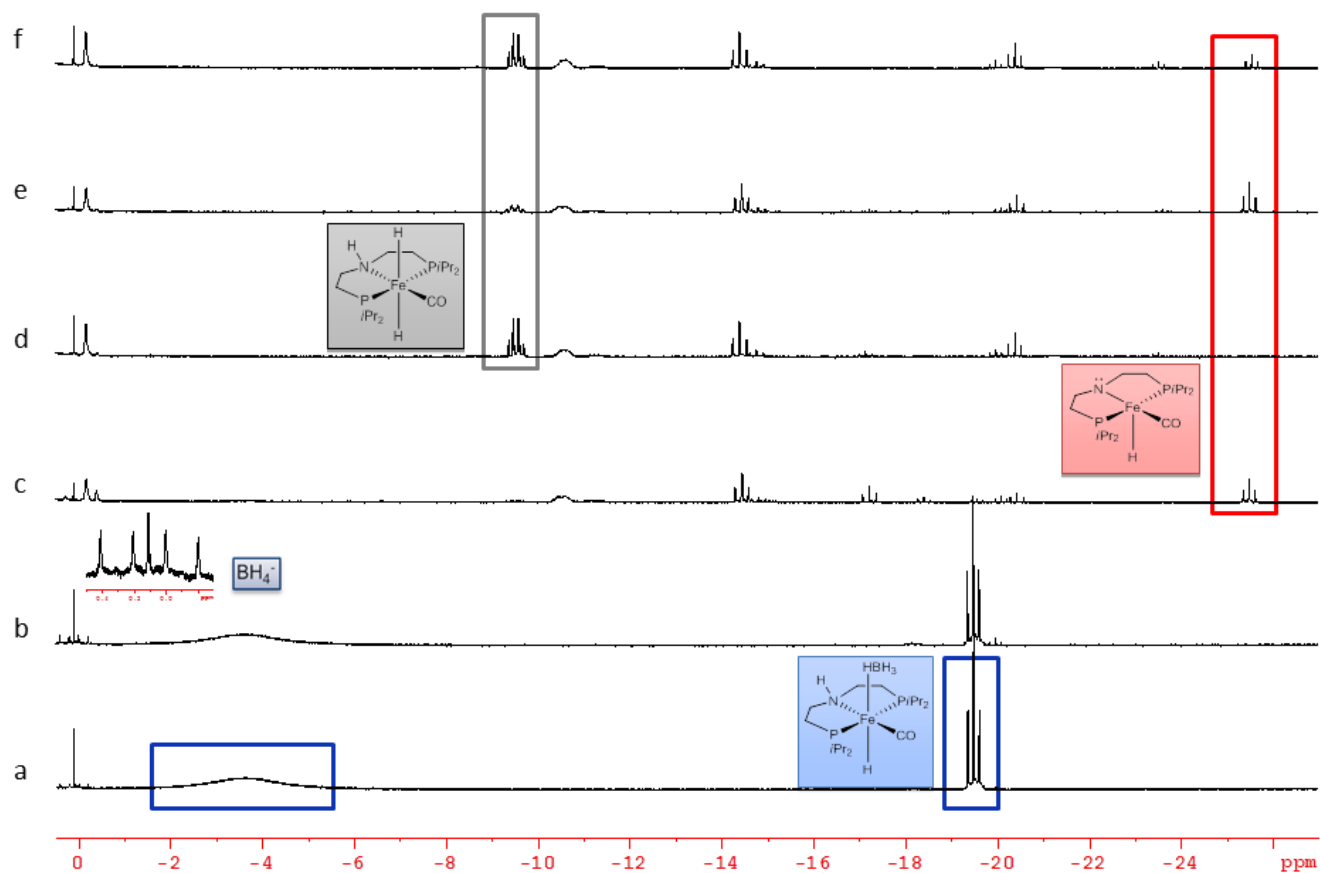

**Supplementary Figure 4.**  $^1\text{H}$  NMR (400.1 MHz) spectra ( $\text{THF-}d_8$ , hydride region) of a solution of **3** and 1.5 eq. PhCN. **Conditions:** Under an argon atmosphere, complex **3** (20 mg, 0.049 mmol) was dissolved in 1 mL  $\text{THF-}d_8$  and PhCN (7.6 mg, 0.074 mmol) was added. The resulting yellow orange solution was transferred by means of a gas-tight syringe to a J-Young NMR tube and  $^1\text{H}$  and  $^{31}\text{P}$  NMR spectra were recorded (Supplementary Figures 4 and 5). The relative experimental conditions are reported in the caption of Supplementary Figure 5: only spectra referring to new experimental conditions or showing changes as compared to the one recorded previously are shown.

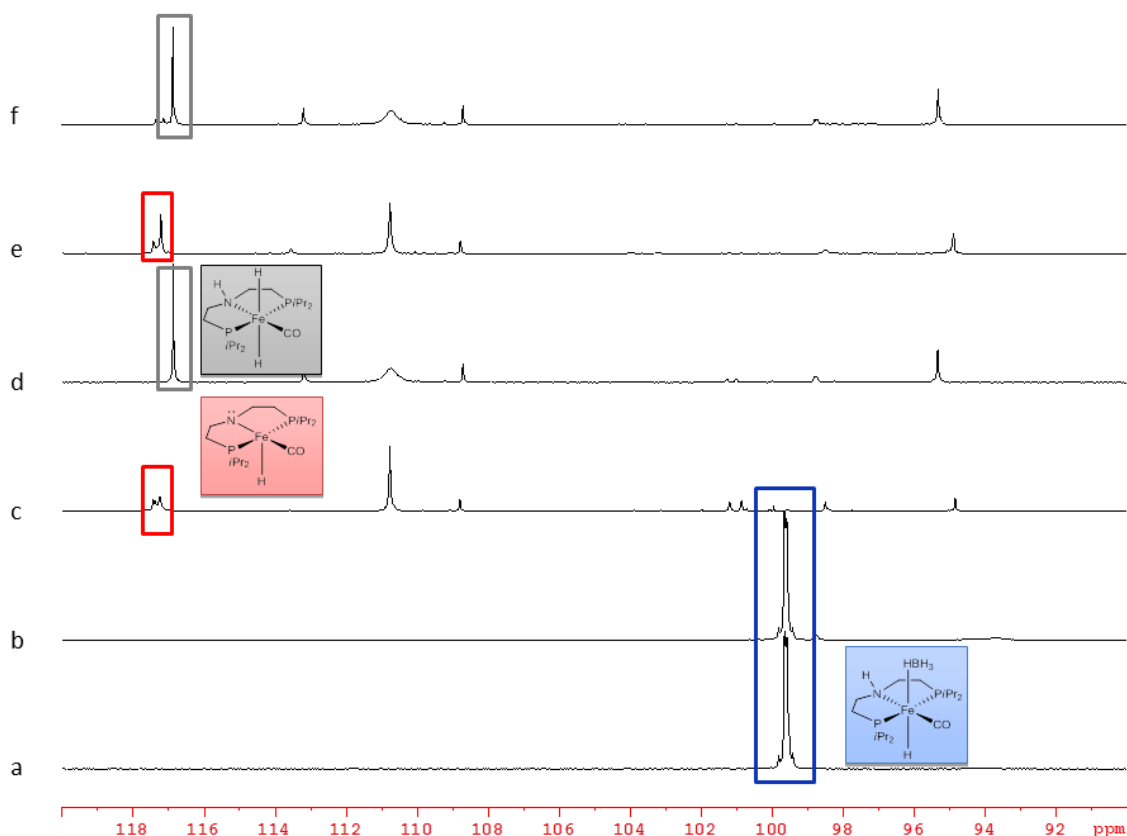

**Supplementary Figure 5.**  $^{31}\text{P}\{^1\text{H}\}$  NMR (161.9 MHz) spectra (THF- $d_8$ ) of a solution of **3** and 1.5 eq. PhCN: residual coupling to hydrides is present for some species.

spectra **a**: **room temperature**, reference spectrum, recorded immediately after sample preparation under **argon**; the sample is then heated to 60° C.

spectra **b**: recorded after keeping the sample at 60° C for 15 min under **argon**: the catalyst precursor **3** is no longer present and new hydrides species appear. One has been confidently identified as the amido complex **9** (*vide infra*). No further spectral changes take place after keeping the sample at 60° C for 90 minutes overall. The sample is cooled to room T. The solution color is deep red. Argon is removed after freezing the sample and replaced by hydrogen (1 bar). The sample is intensively shaken to allow for hydrogen diffusion into the solution, which then turns light orange. It is then placed back into the instrument probe for further measurements.

spectra **c**: **room temperature**, under **hydrogen**: the amido complex **9** has disappeared and a new species appears which has been confidently identified as the dihydride **8** (*vide infra*). Other hydride species are unaffected.

spectra **d**: 60° C, under **hydrogen**: when the sample is heated up, the amido complex **9** reappears at the expenses of the dihydride **8**. No further spectral changes take place after keeping the sample at 60° C for 90 minutes overall. The sample is therefore cooled down to room T before recording the final spectrum.

spectra **e**: **room temperature**, under **hydrogen**: when the sample is cooled down the relative concentration of the dihydride species **8** increases at the expenses of the amido complex **9**. An equilibrium exists therefore between the two species which is dependent upon temperature and hydrogen concentration.

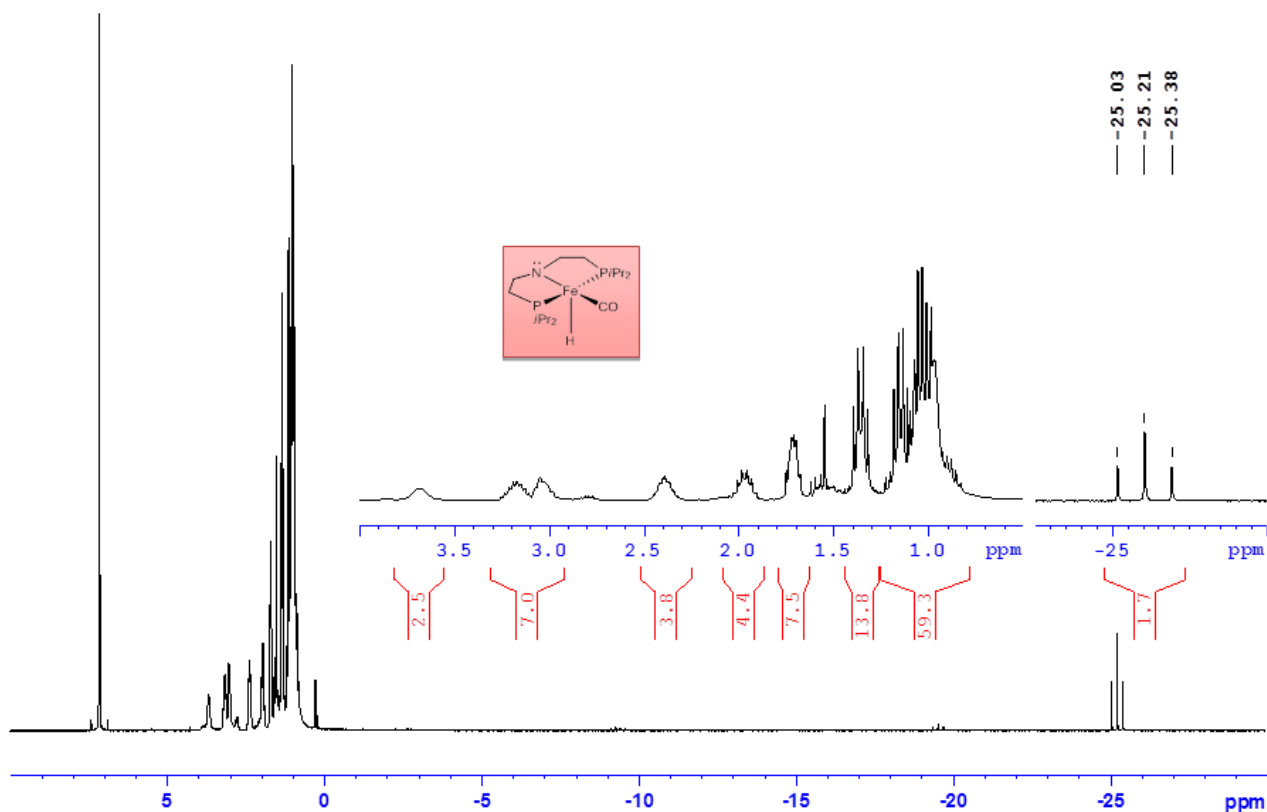

**Supplementary Figure 6.**  $^1\text{H}$  NMR (300.1 MHz) spectrum (benzene- $d_6$ ) of **9**. **Conditions:** Complex **3** (20 mg, 0.049 mmol) and *t*BuOK (6.6 mg, 0.059 mmol) were dissolved in 2 mL *i*PrOH and the resulting yellow suspension stirred at room temperature for 40 min. The solvent was removed in vacuo and the resulting purple solid was dissolved in 1 mL benzene- $d_6$ . The solution was filtered by means of a syringe PTFE filter and placed in a J-Young NMR tube.

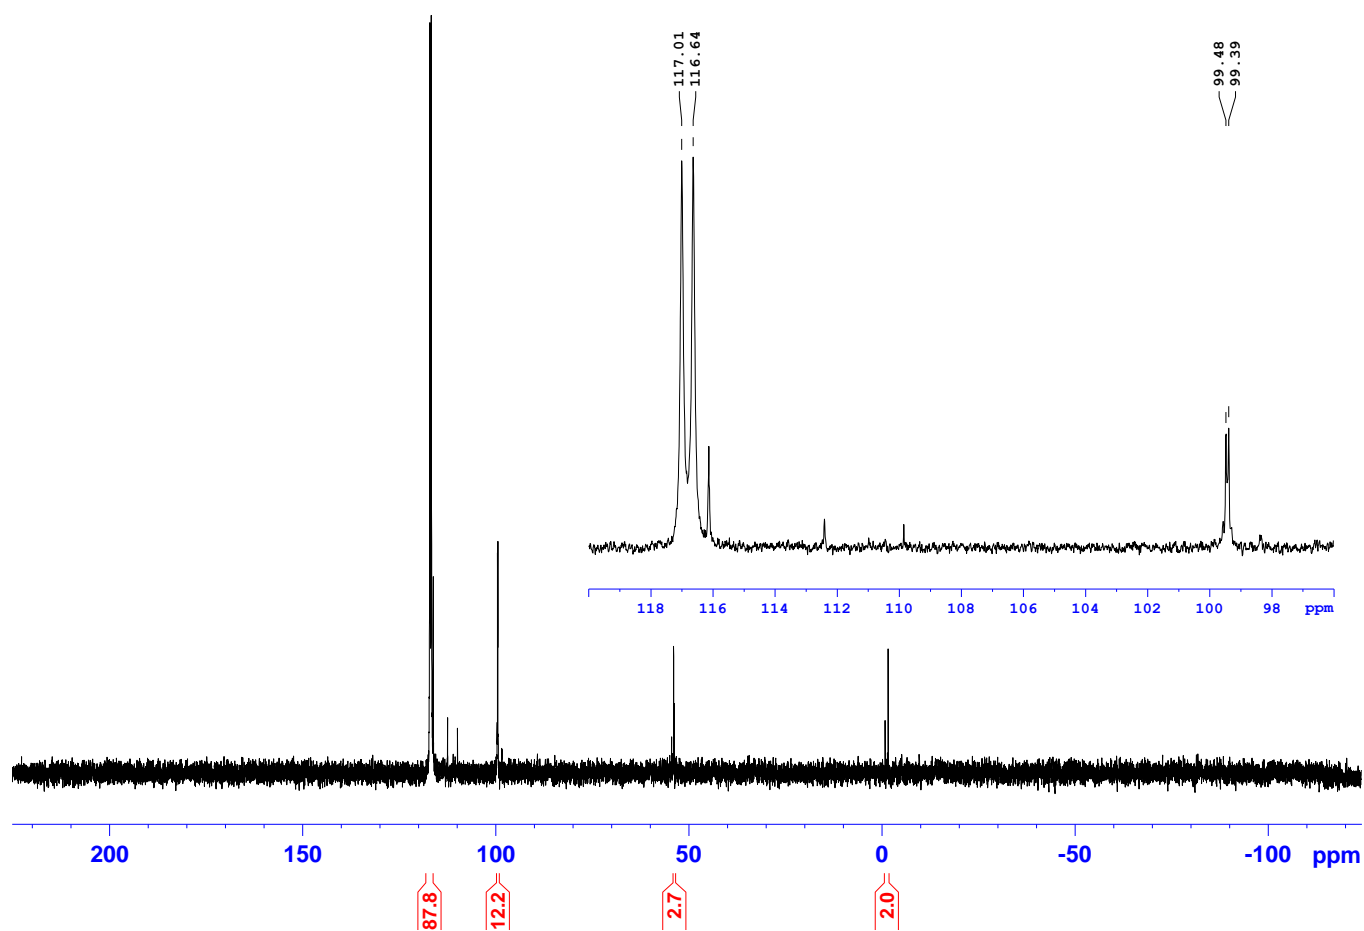

**Supplementary Figure 7.**  $^{31}\text{P}\{^1\text{H}\}$  NMR (121.0 MHz) spectrum (benzene- $d_6$ ) of **9**: the peaks relative to the amido complex **9** ( $\delta = 116.8$  ppm) and unreacted **3** ( $\delta = 99.4$  ppm) appear as doublet due to residual coupling to hydride hydrogens. The spectrum also shows the presence of free ligand ( $\delta = -1.7$  ppm) and free oxidized ligand ( $\delta = 53.9$  ppm).

The above sample was subsequently frozen and argon removed under vacuum. Then hydrogen gas was admitted into the NMR tube, the sample was allowed to thaw and then it was shaken intensively until the solution turned light orange.

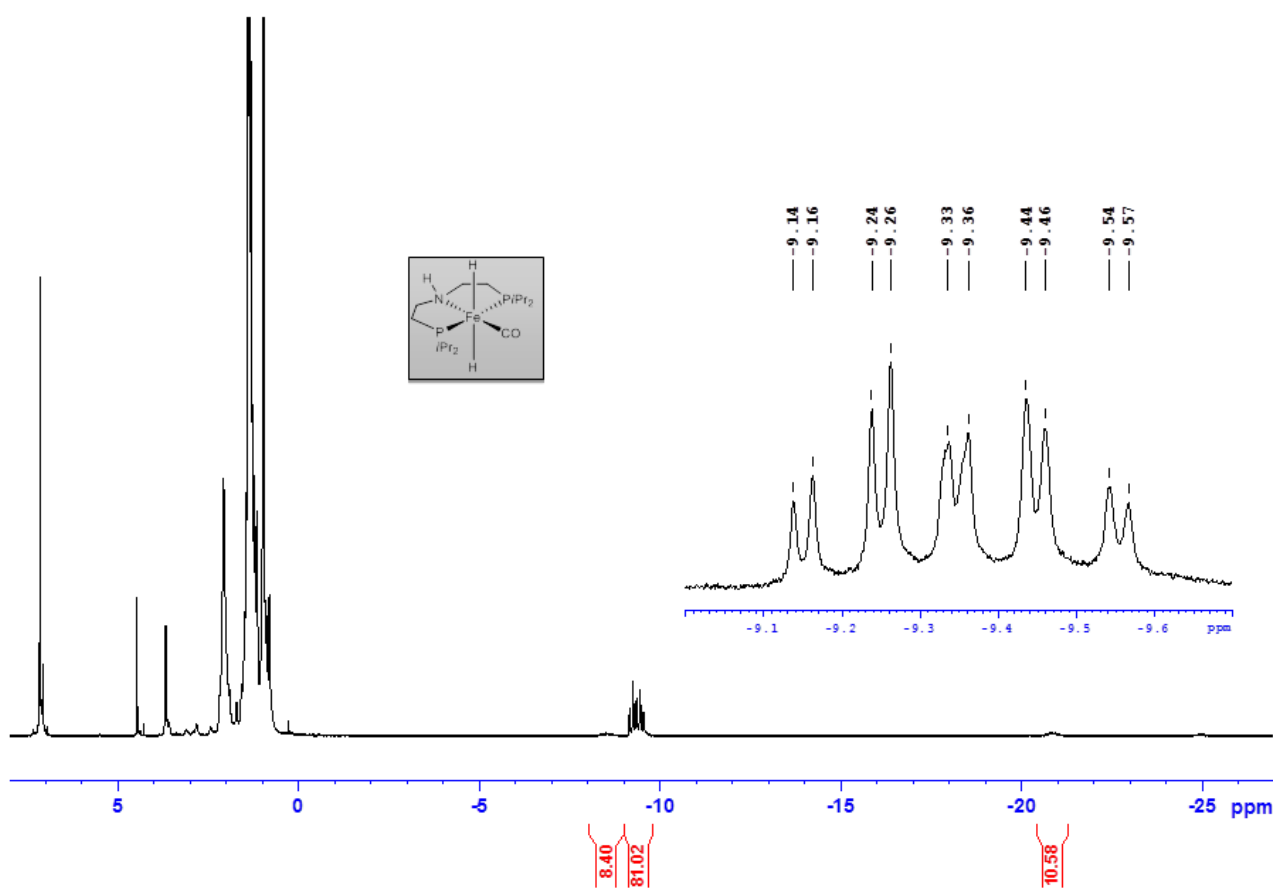

**Supplementary Figure 8.**  $^1\text{H}$  NMR (400.1 MHz) spectrum (benzene- $d_6$ ) of **8**.

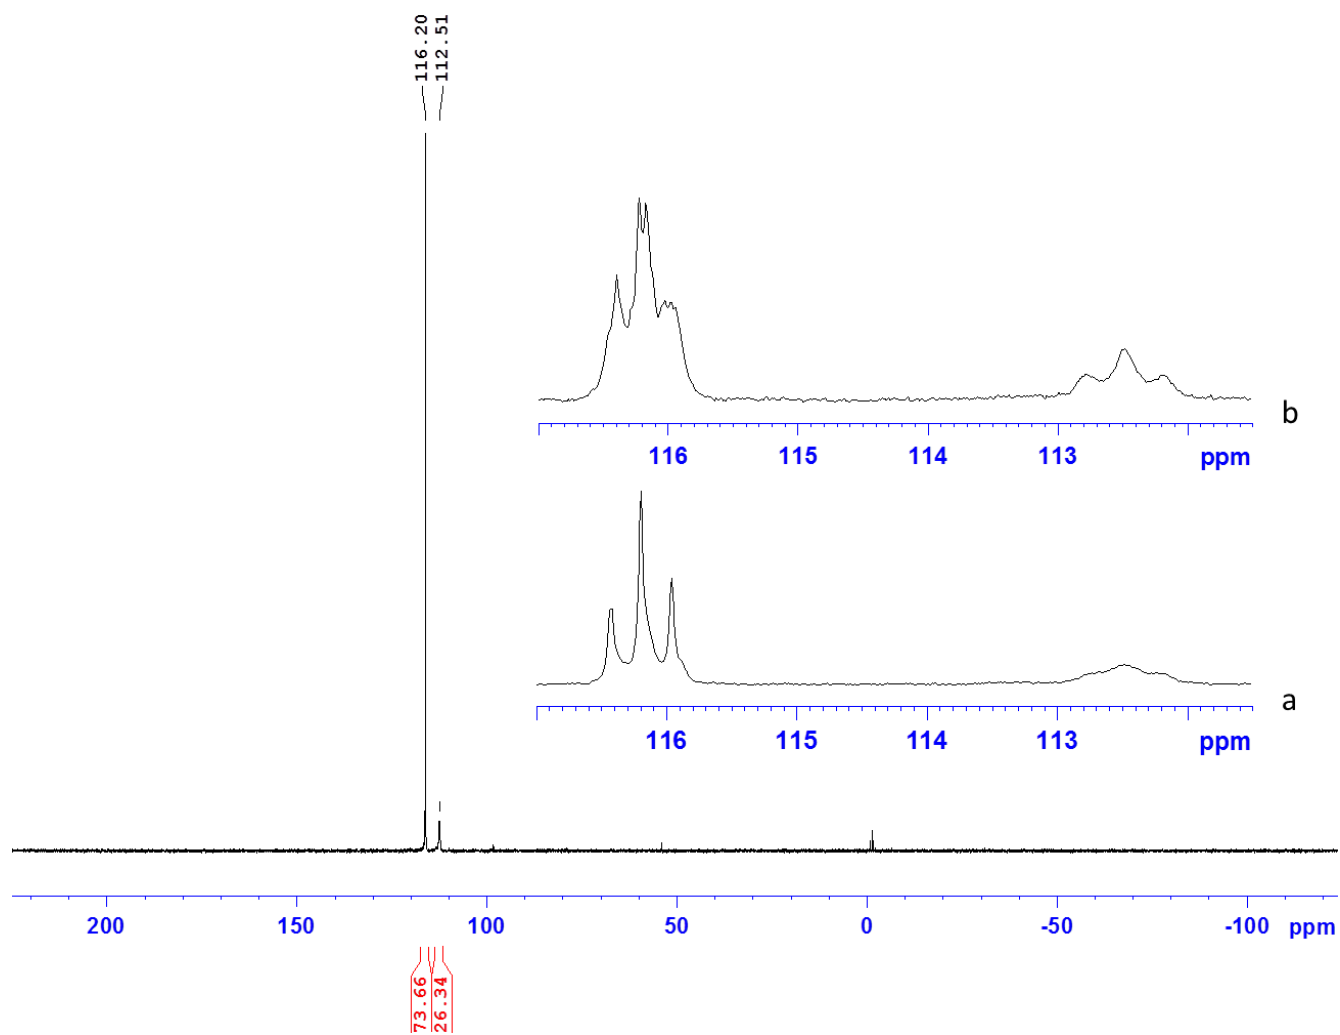

**Supplementary Figure 9.**  $^{31}\text{P}\{^1\text{H}\}$  NMR (161.9 MHz) spectrum (benzene- $d_6$ ) of **8**: insert **a** and **b** show the  $^{31}\text{P}\{^1\text{H}\}$  NMR spectra, selectively decoupled from ligand hydrogens, showing the residual coupling of the phosphorus atoms to the two hydrides in the molecule. The two spectra have been recorded using different  $90^\circ$  pulse length in order to extend the decoupling frequency range.

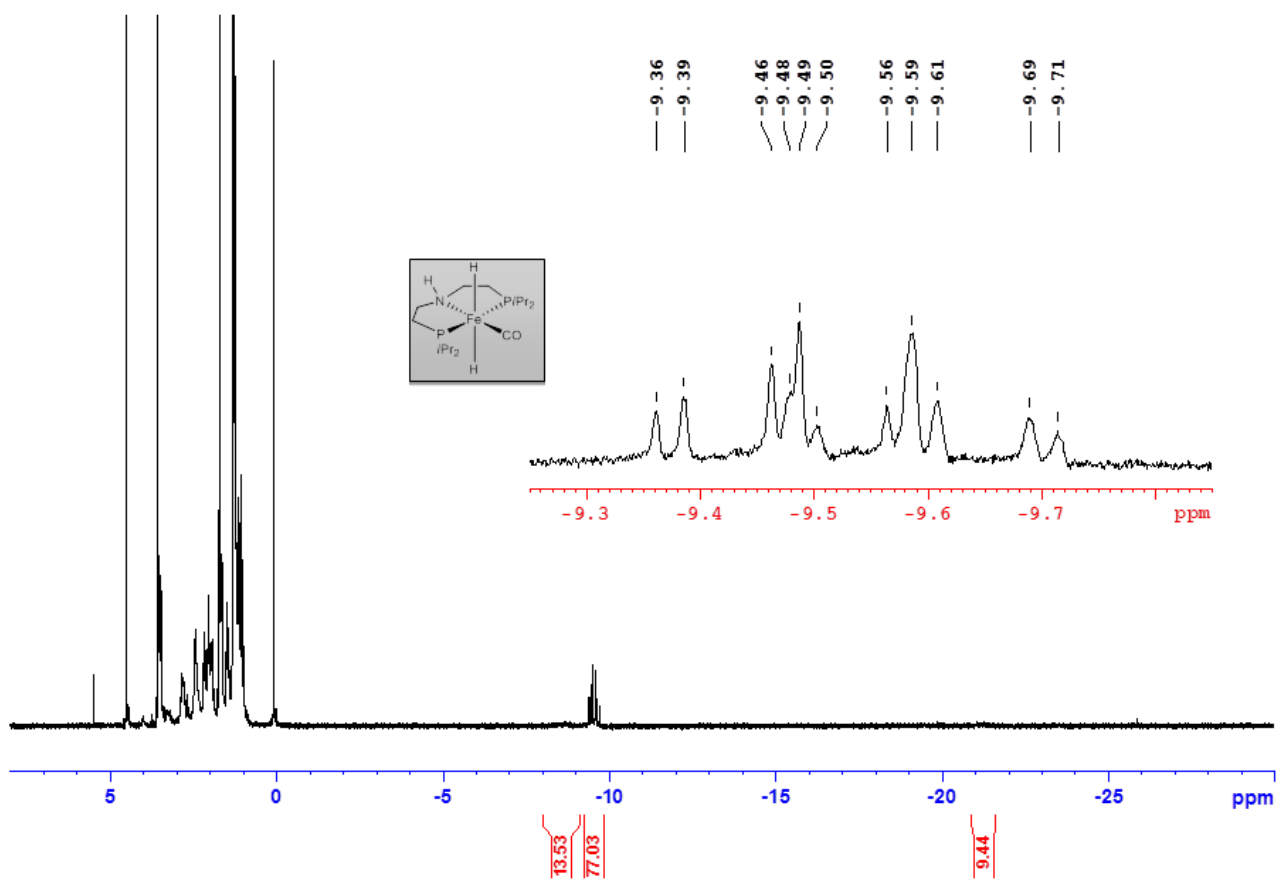

**Supplementary Figure 10.**  $^1\text{H}$  NMR (400.1 MHz) spectrum ( $\text{THF-}d_8$ ) of **8**.

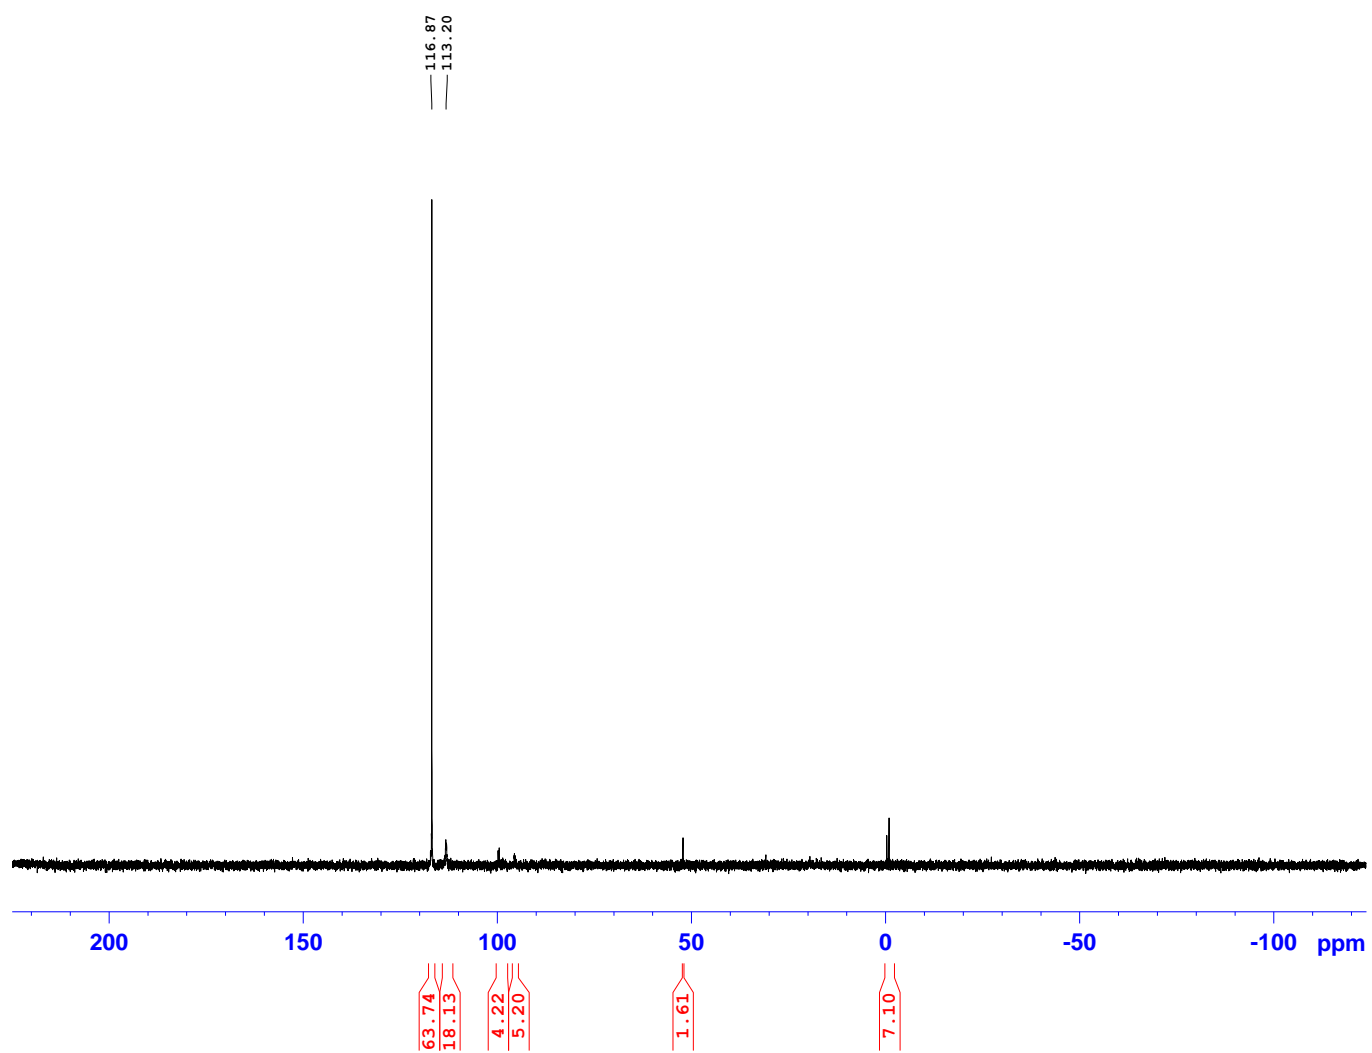

**Supplementary Figure 11.**  $^{31}\text{P}\{^1\text{H}\}$  NMR (161.9 MHz) spectrum ( $\text{THF-}d_8$ ) of **8**.



## 1.5 VT NMR investigations

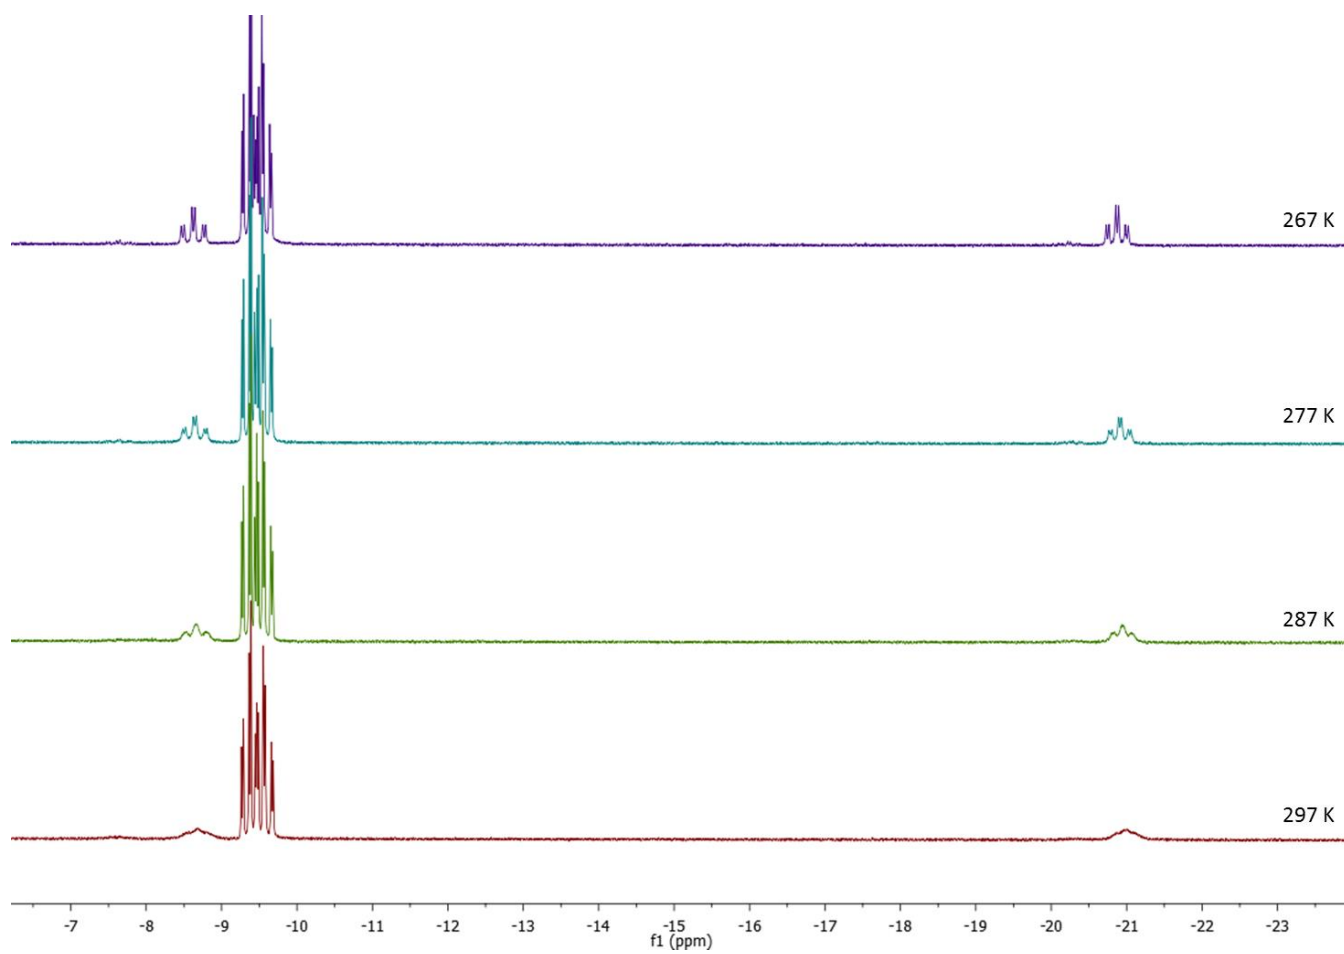

**Supplementary Figure 12.** Variable temperature.  $^1\text{H}$  NMR (400.1 MHz) spectrum (toluene- $d_8$ , hydride region) of **8**.

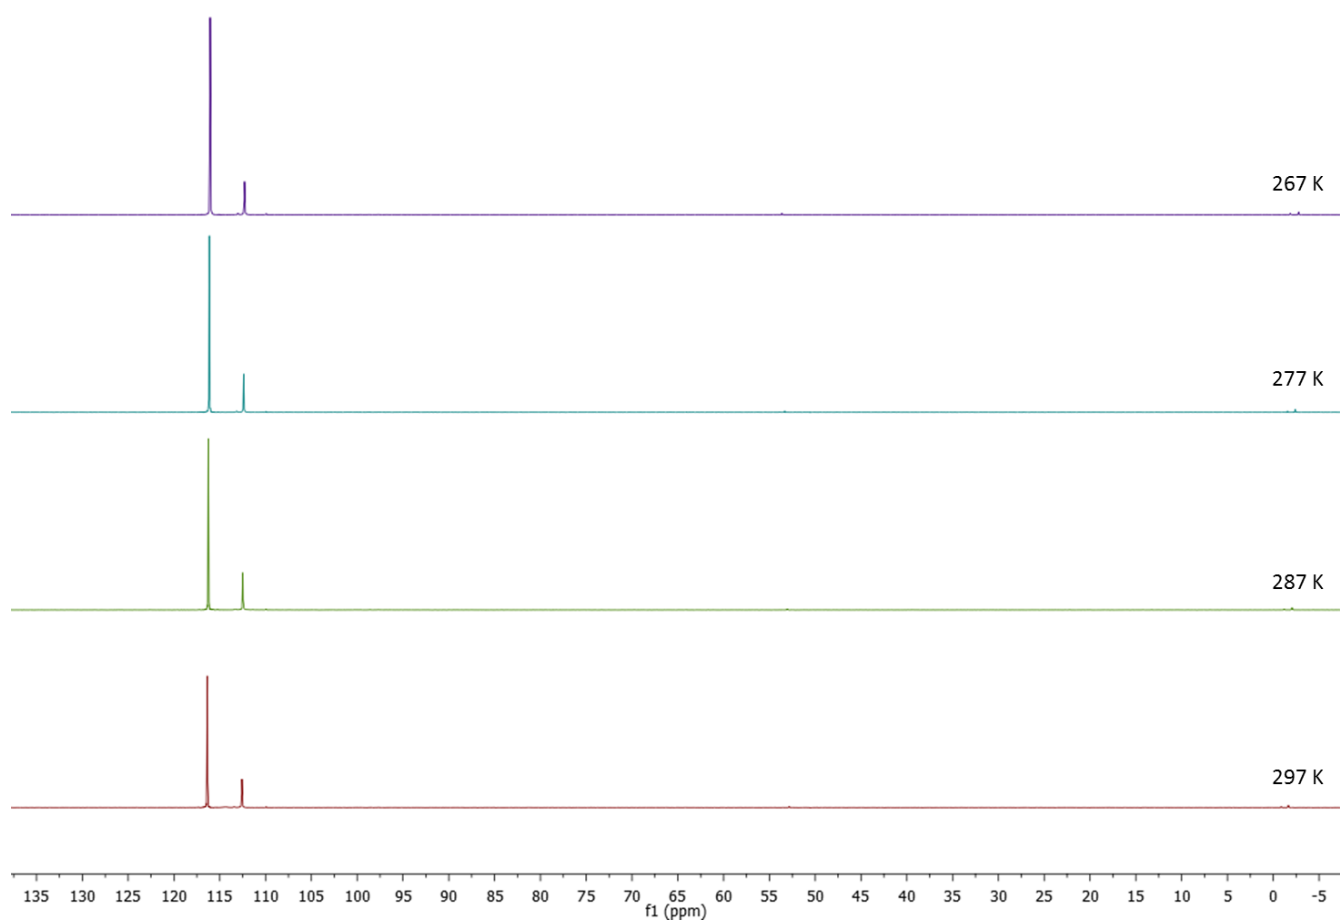

**Supplementary Figure 13.** Variable temperature  $^{31}\text{P}\{^1\text{H}\}$  NMR (161.9 MHz) spectrum ( $\text{toluene-}d_8$ ) of **8**.

Alberico, EA02-086  
1H NOESY (247 K) P-detoupled

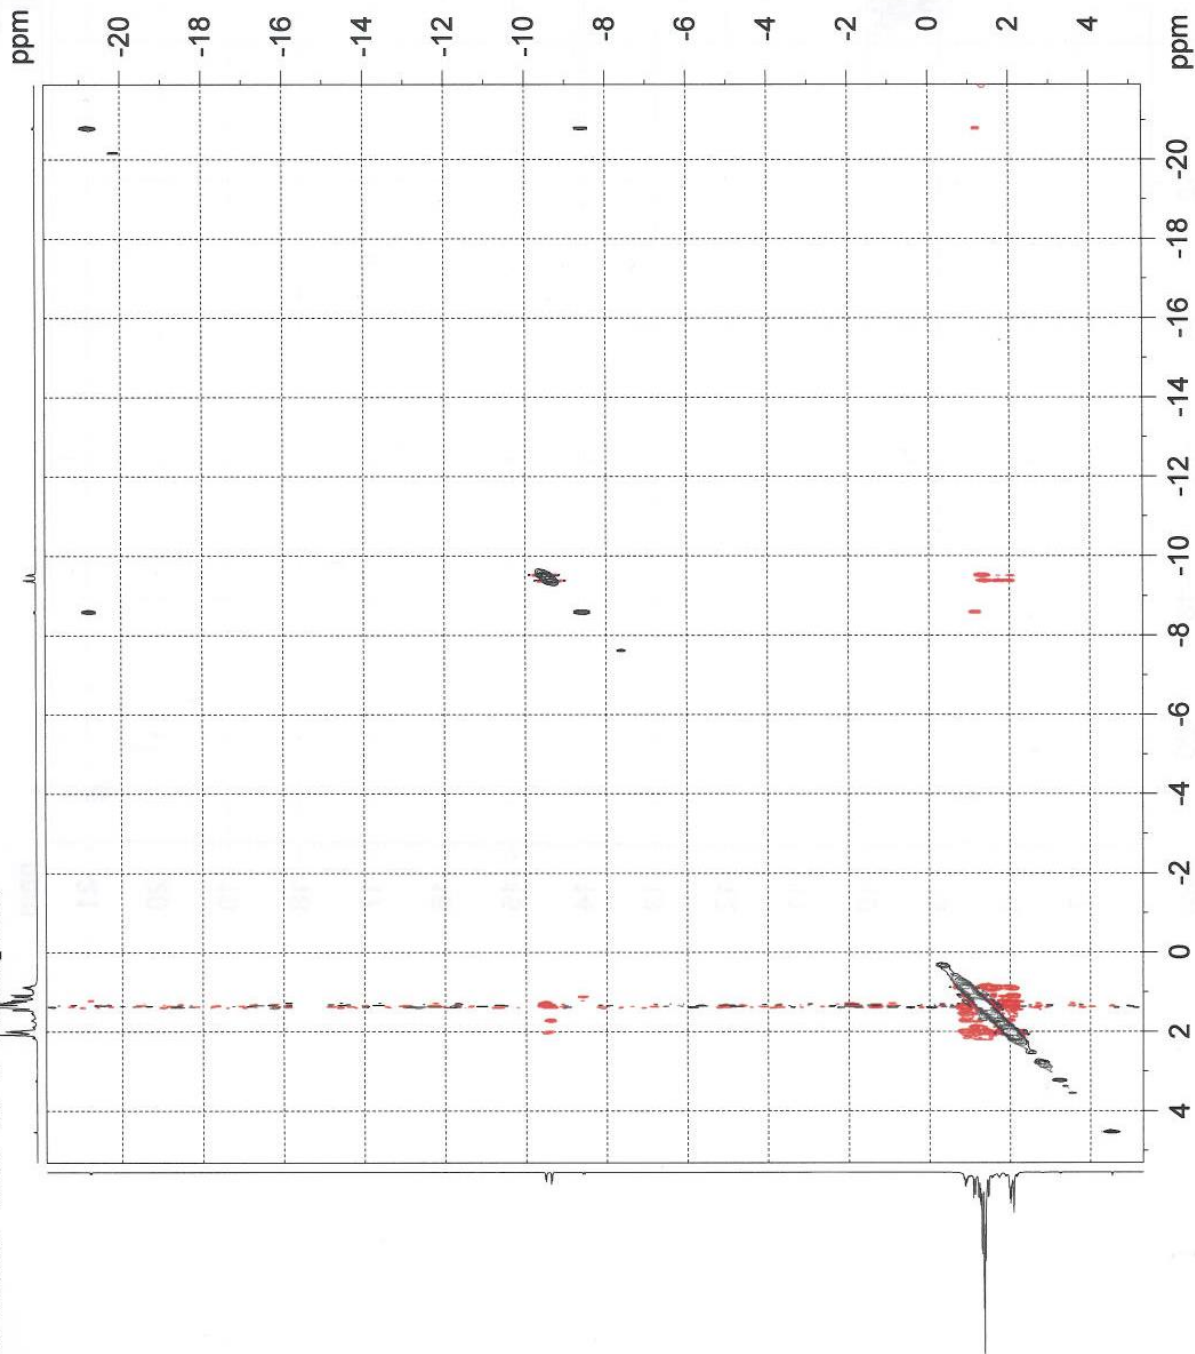

```
Current Data Parameters
NAME      140311_40a
EXPNO     307
PROCNO    1

F2 - Acquisition Parameters
Date_     20140311
Time      16.17
INSTRUM   AV400
PROBHD    5 mm PABBO BB-
PULPROG   noesyzgph
TD         4096
SOLVENT   TOL
NS         8
DS         4
SWH        10893.246 Hz
FIDRES     2.659484 Hz
AQ         0.1880064 sec
RG         256
DW         45.900 usec
DE         6.50 usec
TE         247.0 K
D0         0.0003037 sec
D1         3.0000000 sec
D8         0.3000001 sec
D11        0.0300000 sec
INO        0.00009180 sec

===== CHANNEL f1 =====
NUC1       1H
PCPD1     12.20 usec
PL1        -2.00 dB
PL1W       15.44655800 W
SFO1       400.1266730 MHz

===== CHANNEL f2 =====
CPDPRG12  waltz16
NUC2       31P
PCPD2     100.00 usec
PL2        0 dB
PL12       20.50 dB
PL13       26.00 dB
PL1W       23.83780289 W
PL12W      0.21245463 W
PL13W      0.05987785 W
SFO2       161.9940240 MHz

F1 - Acquisition parameters
TD         256
SFO1       400.1267 MHz
FIDRES     42.551743 Hz
SW         27.224 ppm
F2MODE     TPPI

F2 - Processing parameters
SI         6048
SF         400.1299949 MHz
SOLVENT    QSIINE
GB         0 Hz
PC         0

F1 - Processing parameters
SI         1024
MC2        TPPI
SF         400.1299949 MHz
WDW        QSIINE
SSB        2
LB         0 Hz
GB         0
```

Supplementary Figure 14.  $^1\text{H}\{^{31}\text{P}\}$  NOESY NMR (400.1/161.9 MHz) spectrum of **8** (toluene- $d_8$ ), at 247 K.

Alberico, EA02-086  
 $^1\text{H}$  NOESY (247 K) P-decoupled

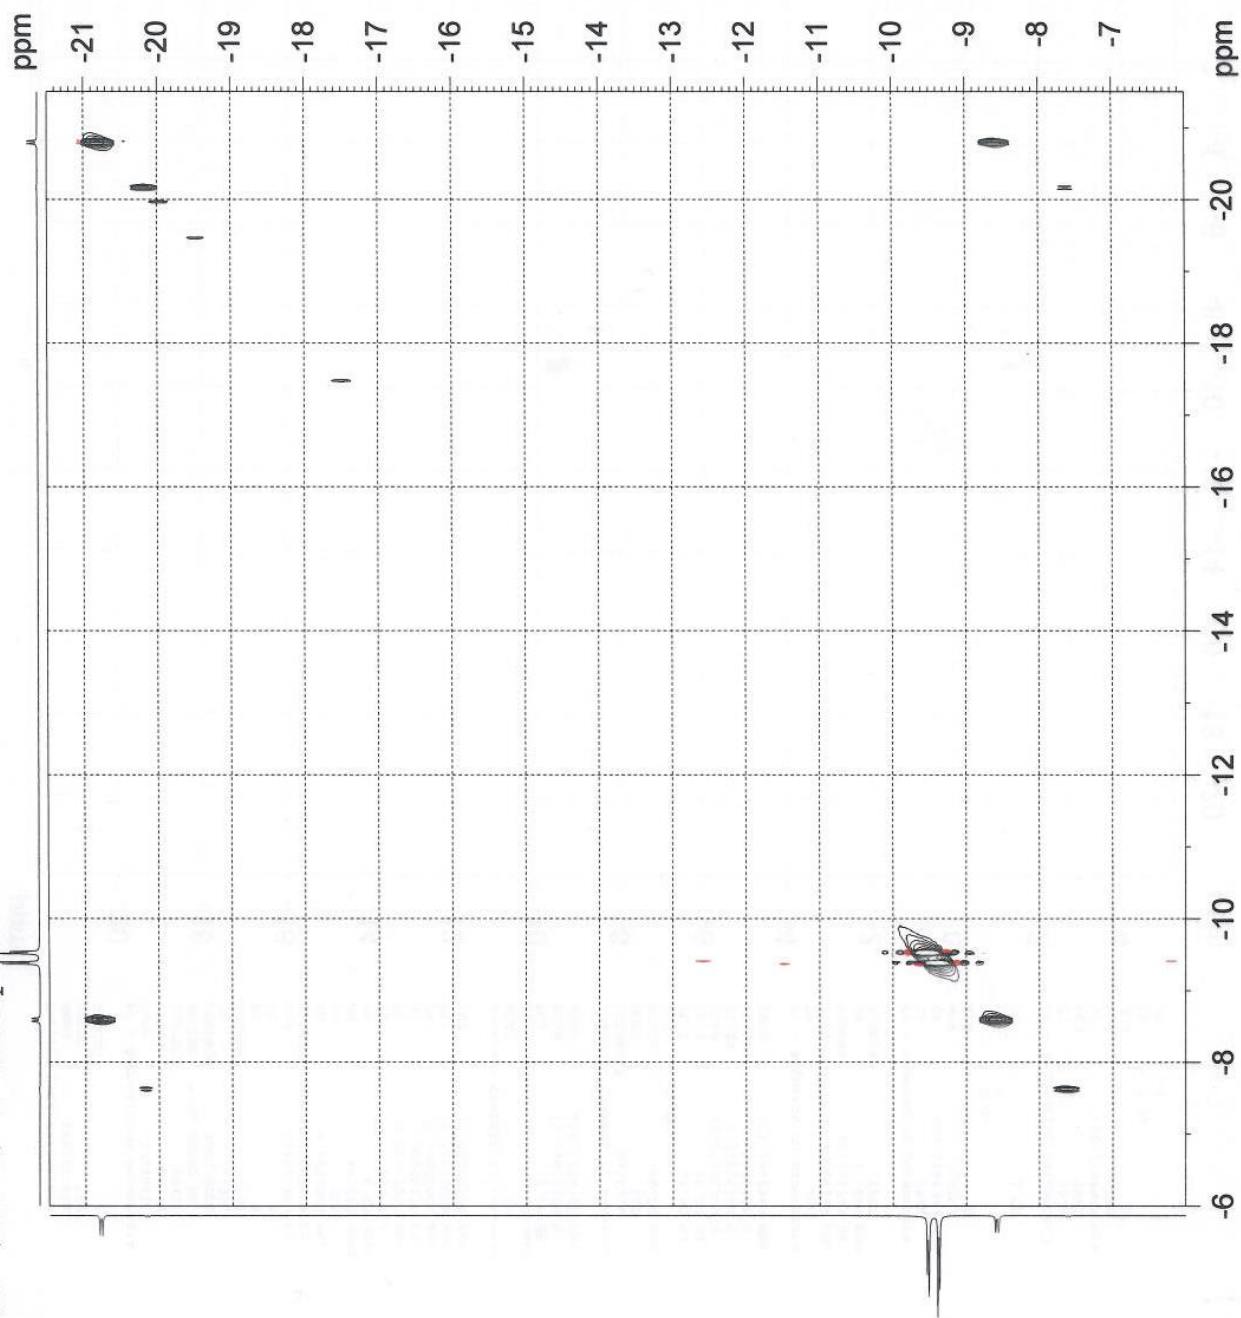

Supplementary Figure 15.  $^1\text{H}\{^{31}\text{P}\}$  NOESY NMR (400.1/161.9 MHz) spectrum of **8** ( $\text{toluene-}d_8$ , hydride region), at 247 K.

Alberico / EA02-051  
1H-13C HMBC Hybrid/alles

Current Data Parameters  
NAME 131210.40a  
EXPNO 8  
PROCNO 1

F2 - Acquisition Parameters  
Date\_ 20131210  
Time 21.22

INSTRUM AV400  
PROBHD 5 mm PABBO BB-  
PULPROG hmcgpnrdqf  
TD 1024  
SOLVENT C6D6  
NS 32  
DS 16  
SMH 1001.603 Hz  
FIDRES 0.978127 Hz  
AQ 0.5111808 sec  
RG 32768  
DW 499.200 usec  
DE 29.50 usec  
TE 300.2 K  
CRST13 8.000000  
D0 0.00000100 sec  
D1 0.00000000 sec  
D4 0.06250000 sec  
D16 0.00020000 sec  
INO 0.00002165 sec

\*\*\*\*\* CHANNEL f1 \*\*\*\*\*  
NUCL 1H  
P1 12.20 usec  
P2 24.40 usec  
PL1 -2.00 dB  
PL2W 45.76926422 W  
SFO1 100.6243190 MHz  
400.1262560 MHz

\*\*\*\*\* CHANNEL f2 \*\*\*\*\*  
NUC2 13C  
P3 10.00 usec  
PL2 -1.40 dB  
PL2W 45.76926422 W  
SFO2 100.6243190 MHz

\*\*\*\*\* GRADIENT CHANNEL \*\*\*\*\*  
GPNAM[1] SINE.100  
GPNAM[2] SINE.100  
GPNAM[3] SINE.100  
GPZ1 50.00 V  
GPZ2 30.00 V  
GPZ3 40.10 V  
P16 1000.00 usec

F1 - Acquisition parameters  
TD 256  
SFO1 100.6243 MHz  
FIDRES 90.269531 Hz  
SW 229.656 ppm  
FMODE Qf

F2 - Processing parameters  
SI 512  
SF 400.129963 MHz  
WDW SINE  
SSB 0 Hz  
LB 0  
GB 0  
PC 1.40

F1 - Processing parameters  
SI 512  
MC2 Qf  
SF 100.6127363 MHz  
WDW SINE  
SSB 0 Hz  
LB 0

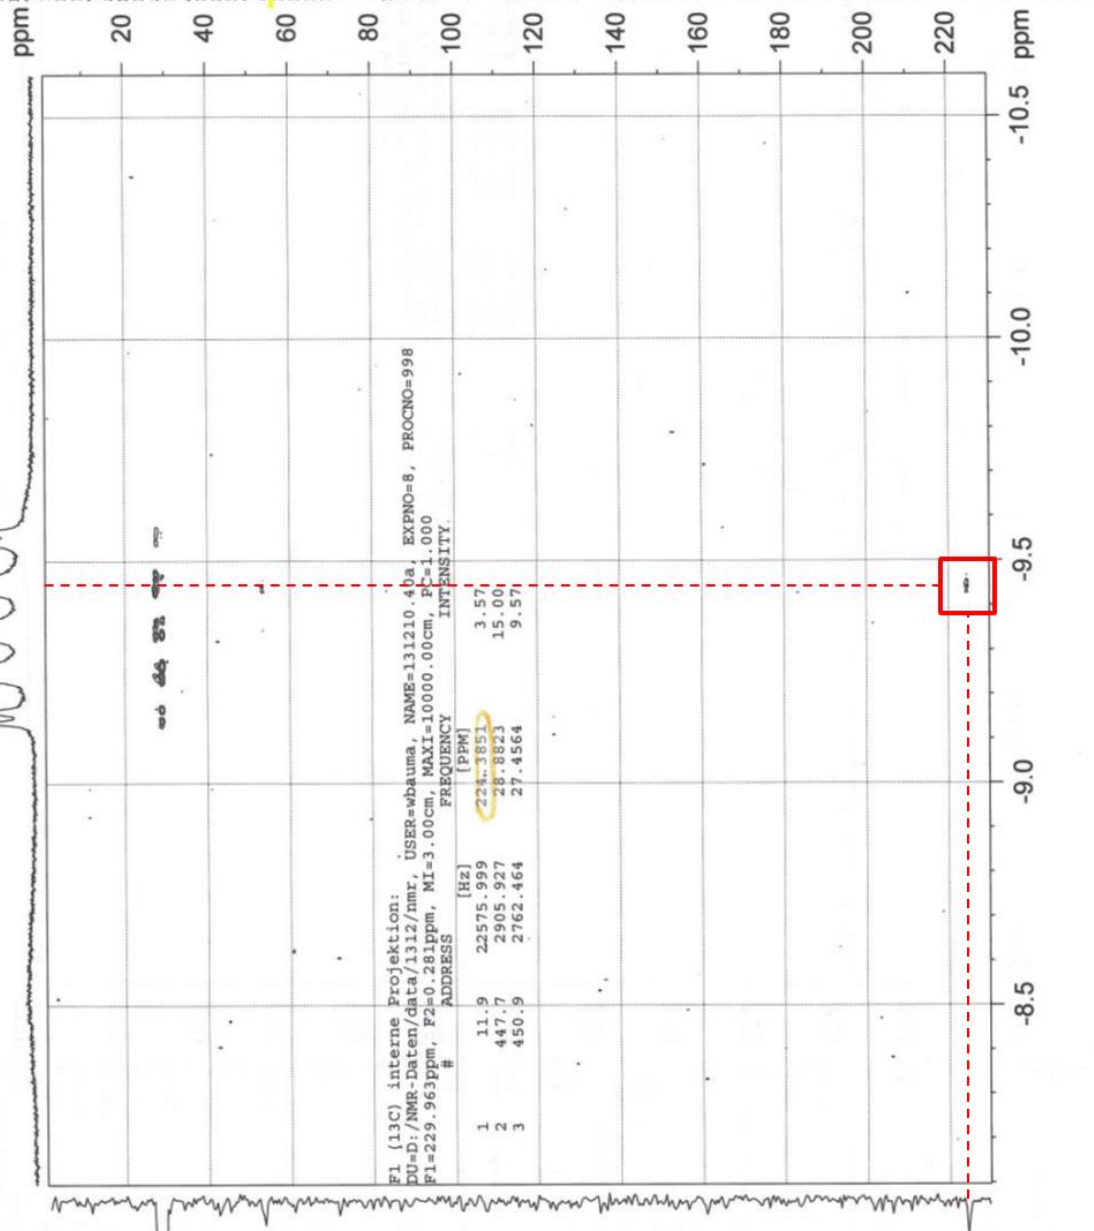

Supplementary Figure 16. <sup>1</sup>H-<sup>13</sup>C HMBC NMR (400.1/100.6 MHz) spectrum of **9** (C<sub>6</sub>D<sub>6</sub>), hydride region showing the two-bond coupling between the carbon of the coordinated carbonyl group ( $\delta = 224.4$  ppm) and the iron hydrides.

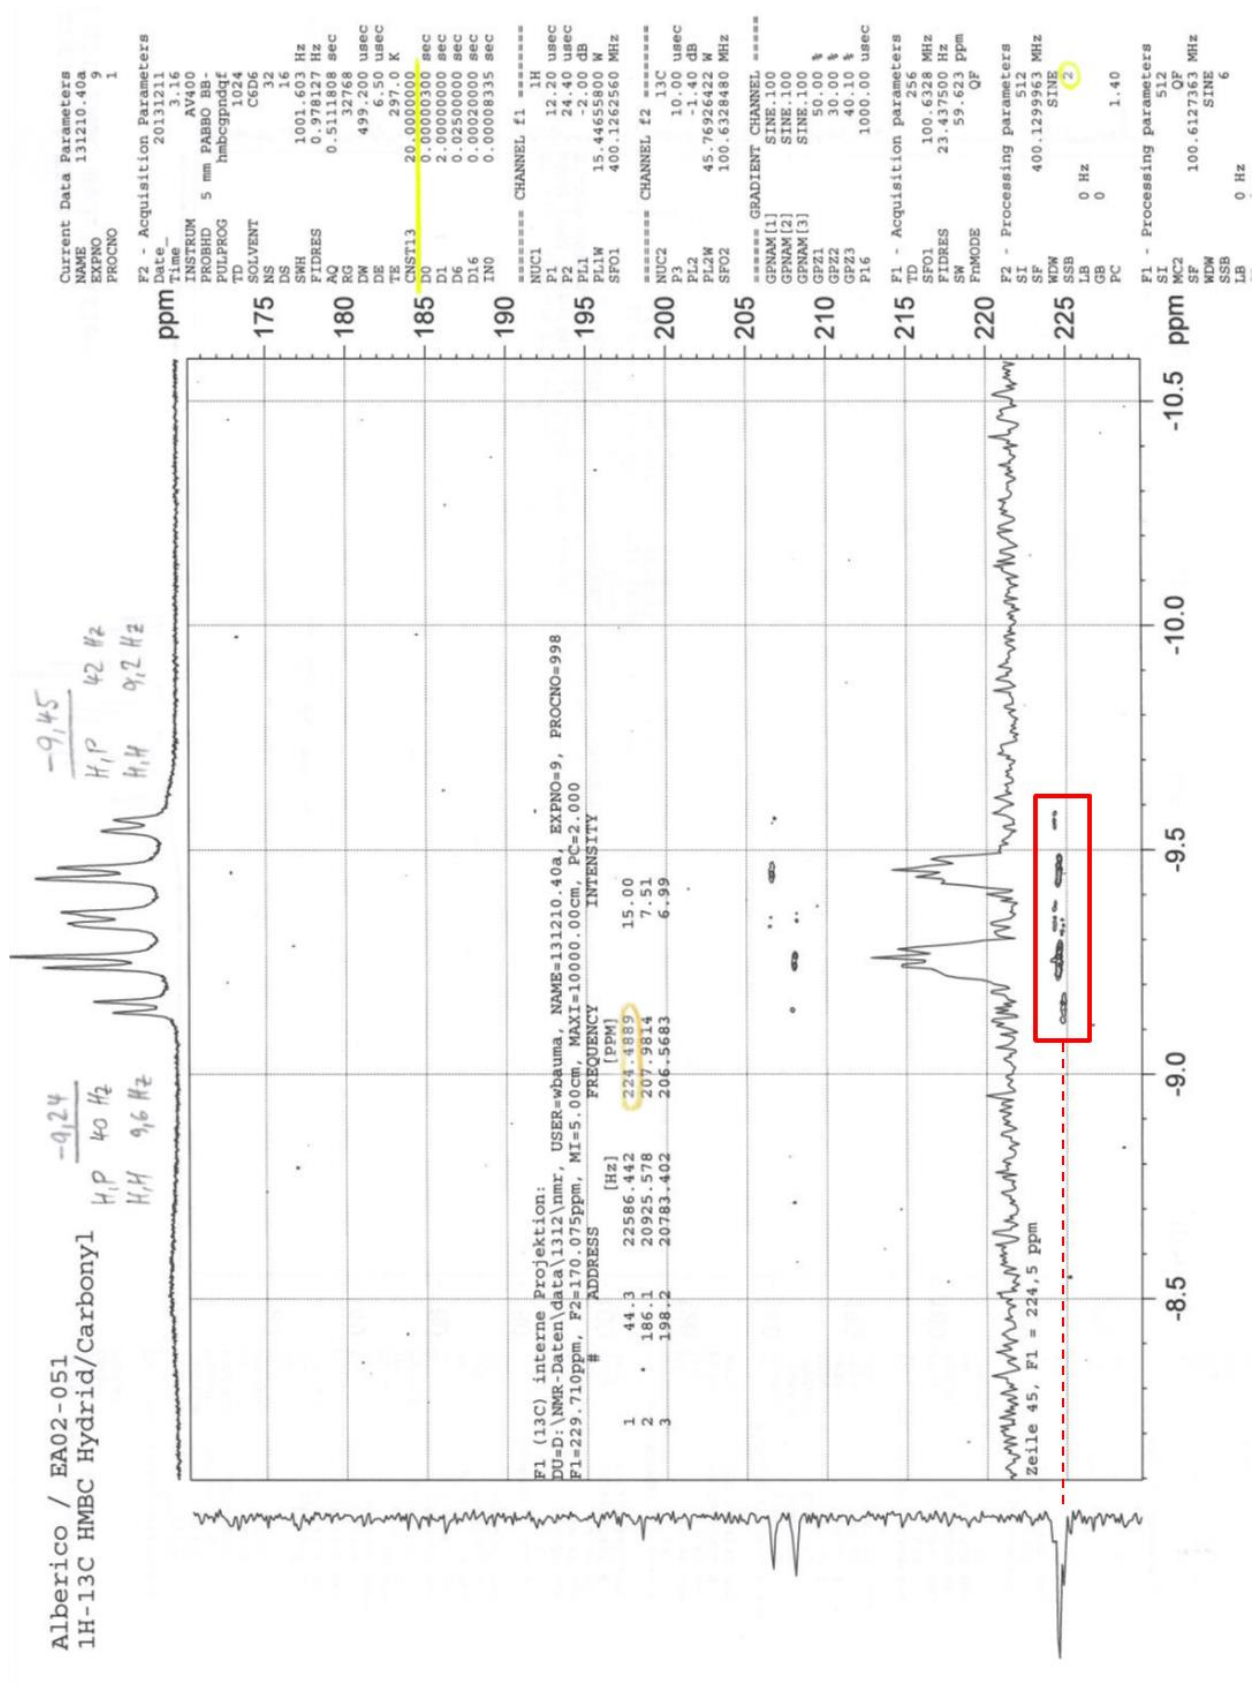

**Supplementary Figure 17.**  $^1\text{H}$ - $^{13}\text{C}$  HMBC NMR (400.1/100.6 MHz) spectrum ( $\text{C}_6\text{D}_6$ , hydride region). The correlation signals at F2 206.6 ppm and 208.0 are folded (true chemical shifts 27.4 ppm and 28.9 ppm, ligand moiety carbon, see Suppl. Fig. 12).

## 1.6 Selected NMR spectra of isolated HCl products 2, 5, 7

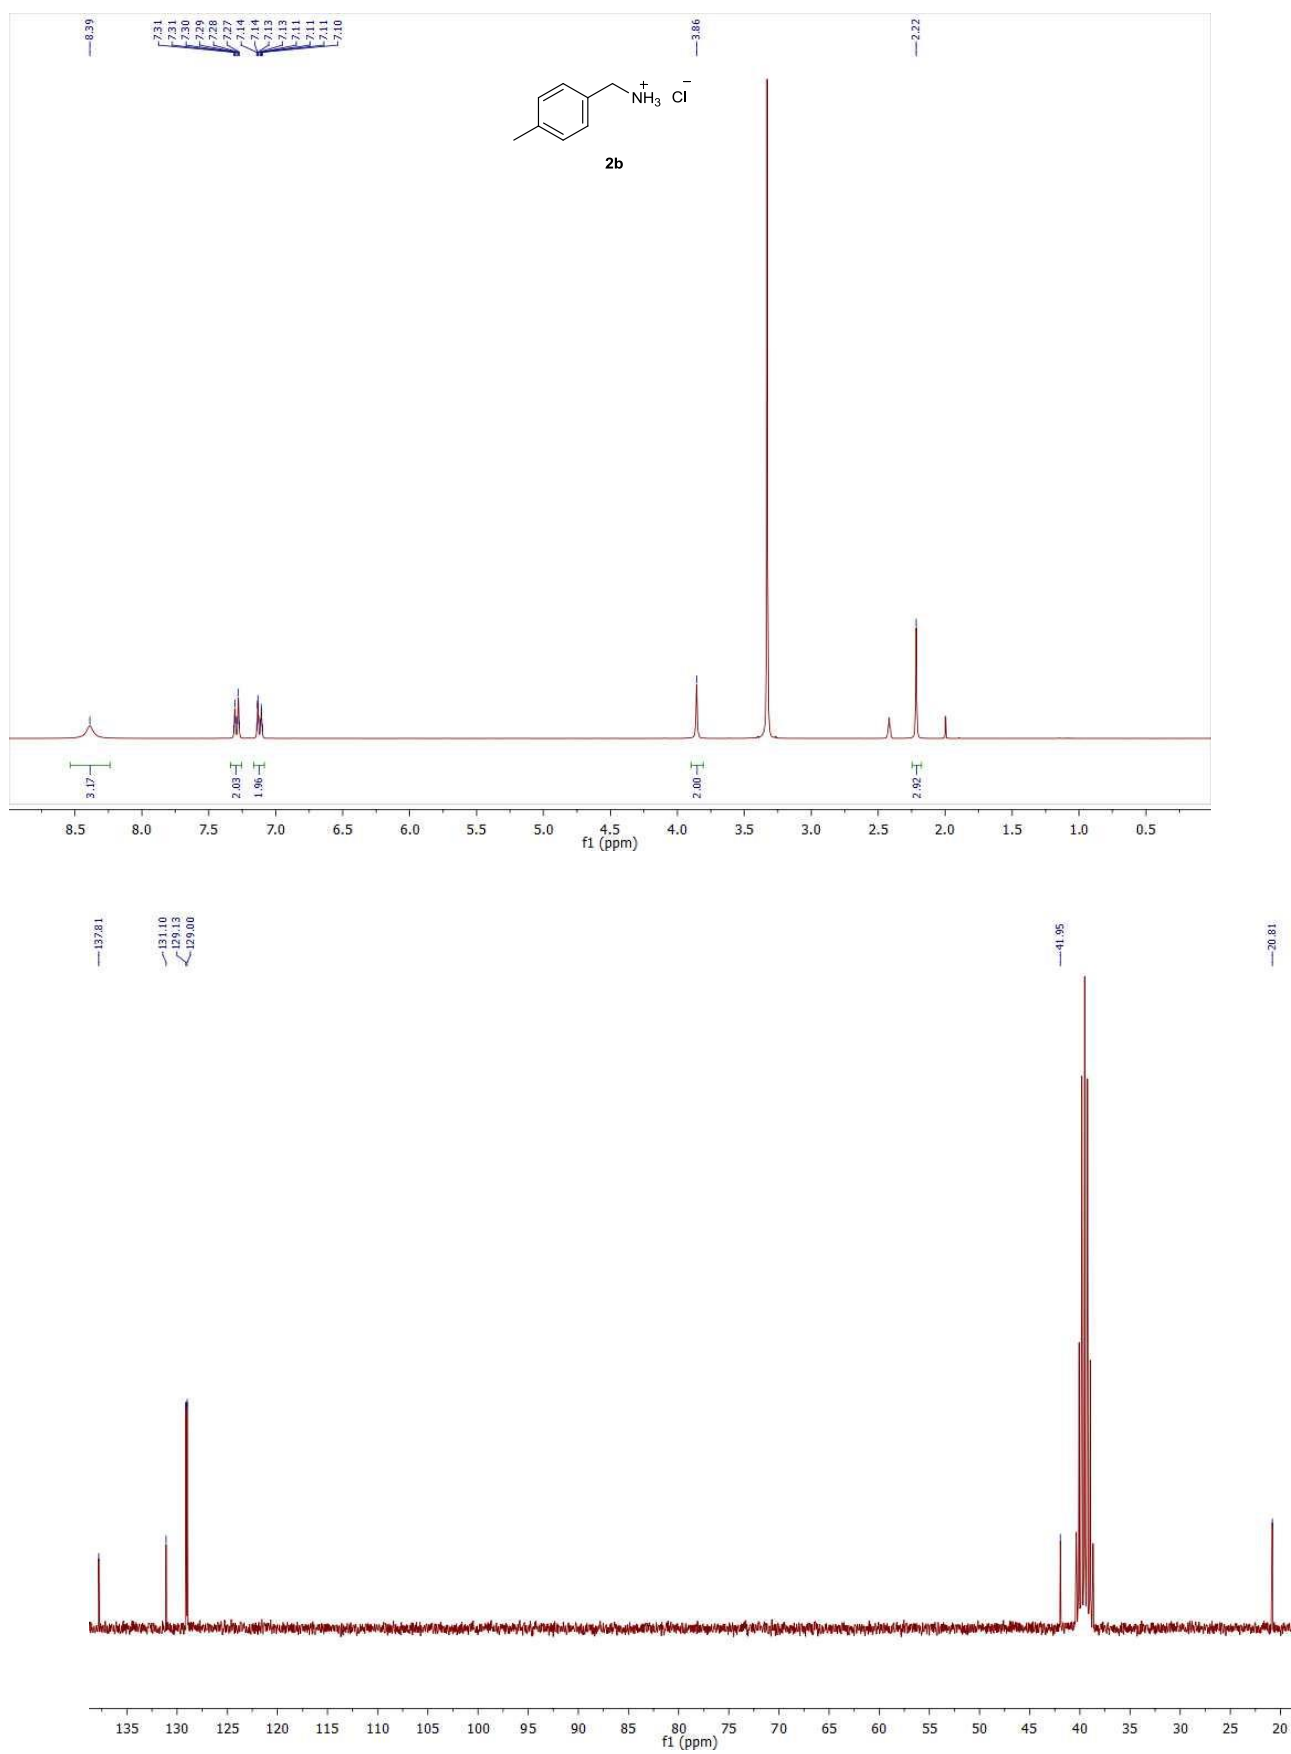

Supplementary Figure 18.  $^1\text{H}$  and  $^{13}\text{C}$  NMR of compound **2b**.

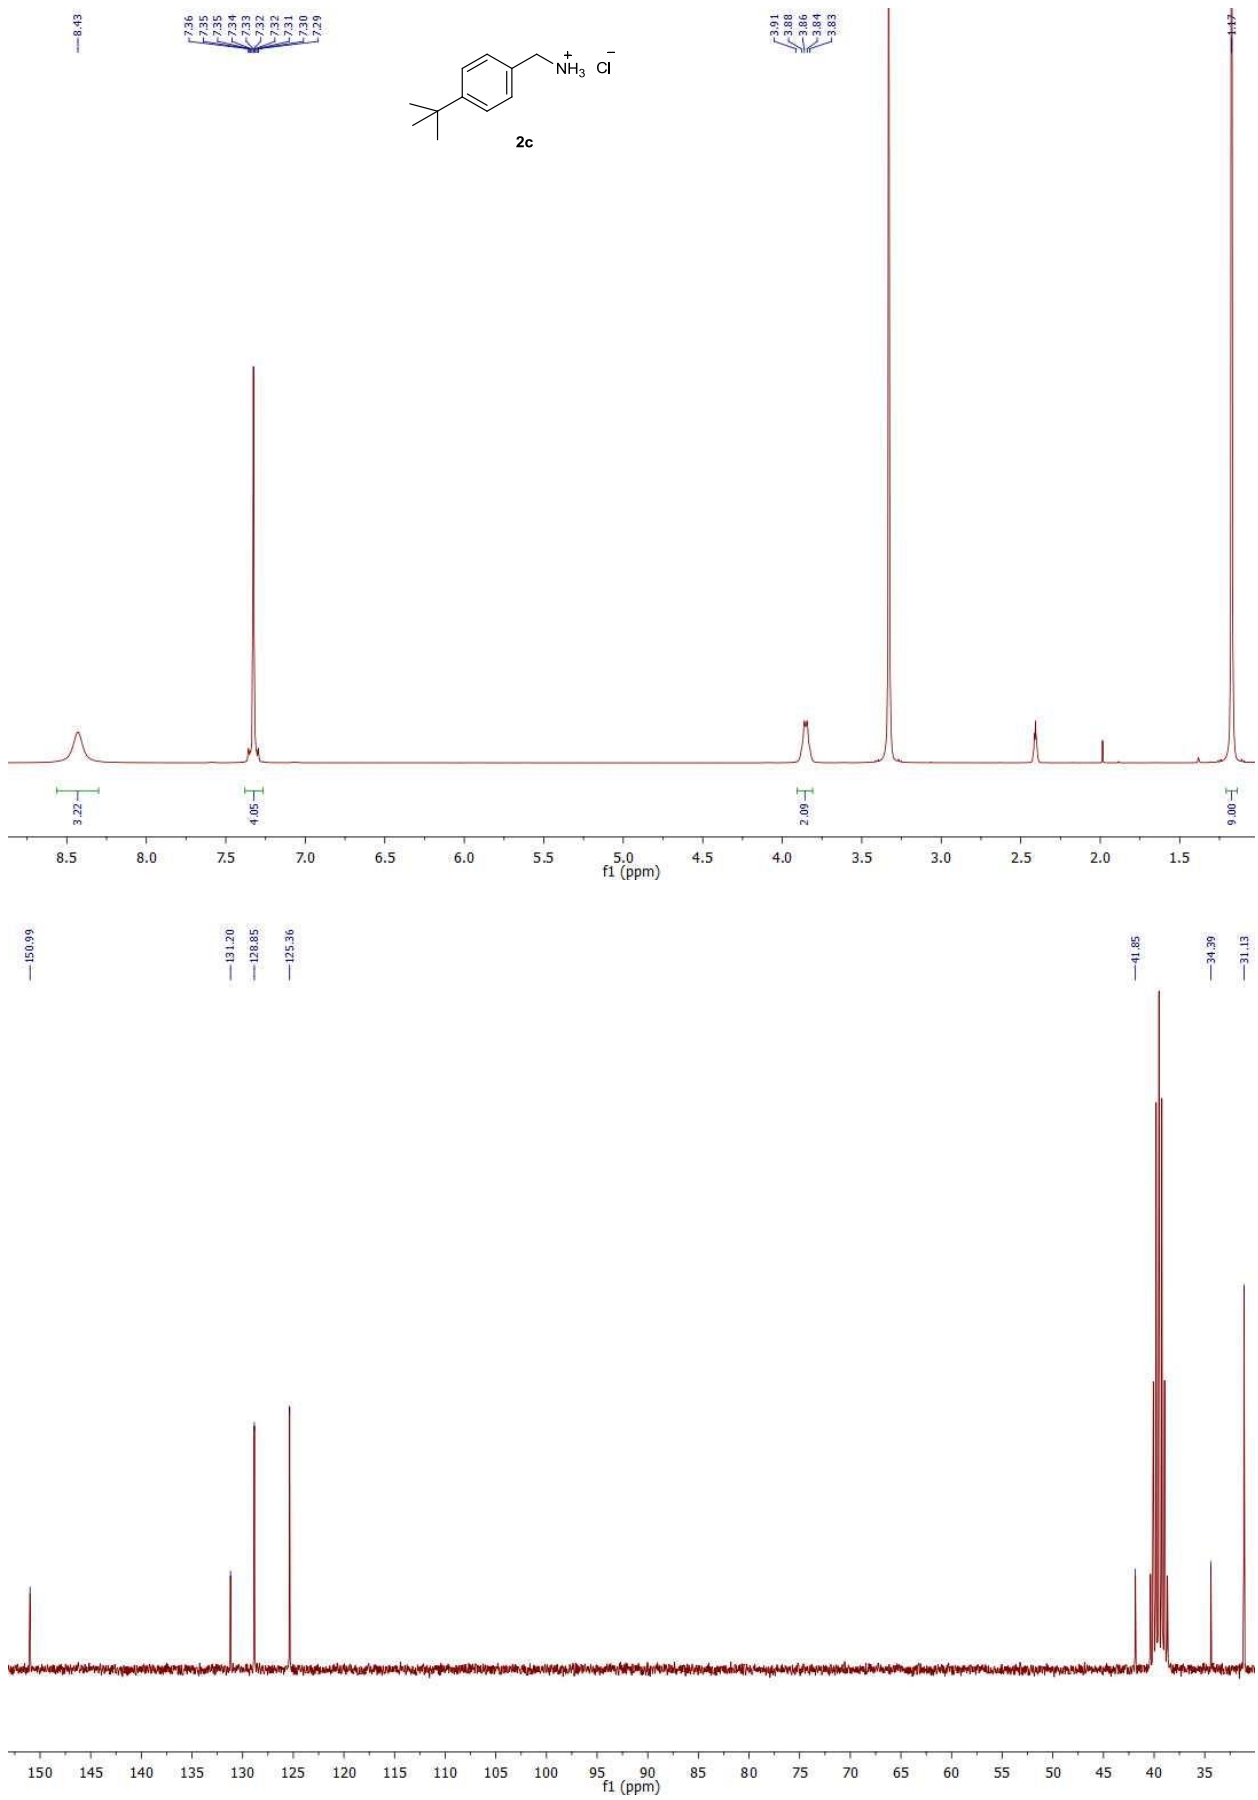

Supplementary Figure 19. <sup>1</sup>H and <sup>13</sup>C NMR of compound 2c.



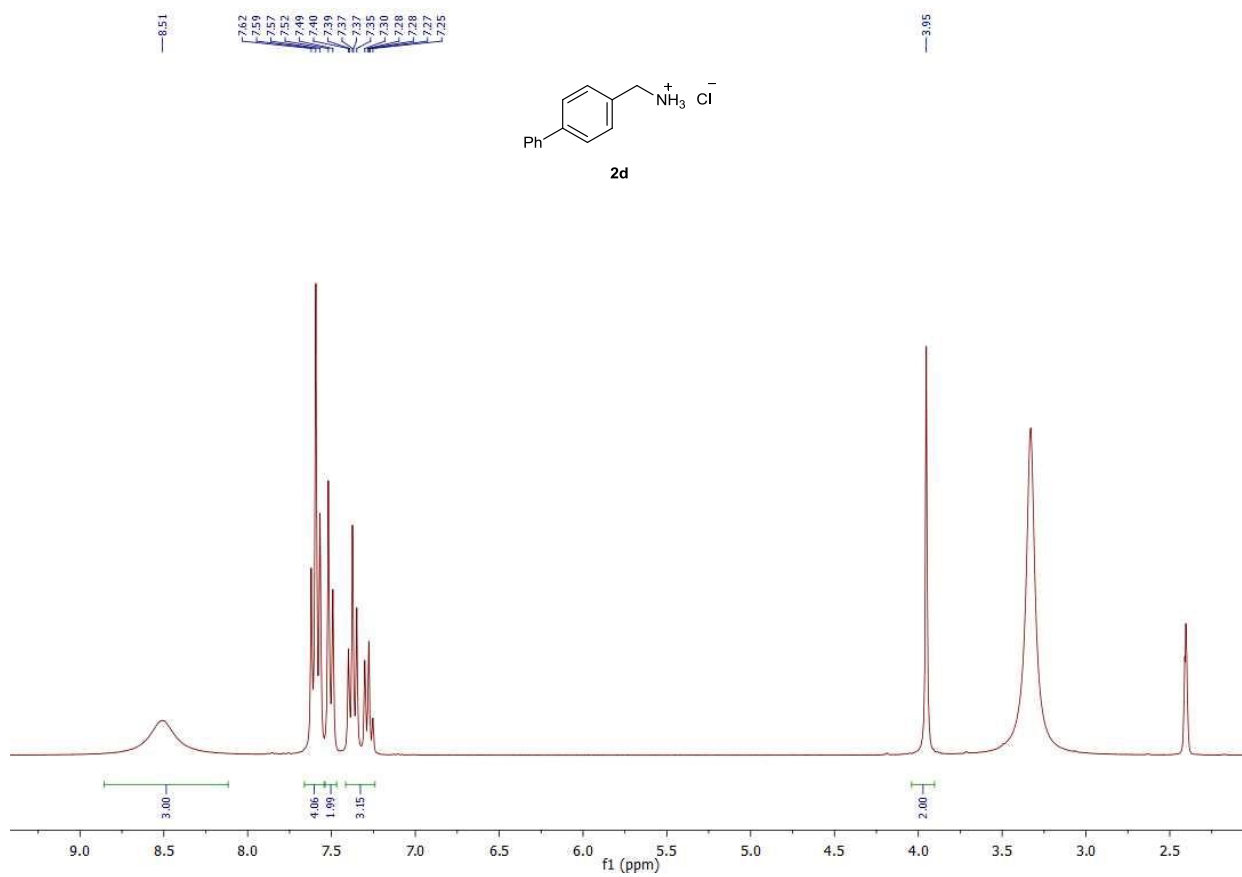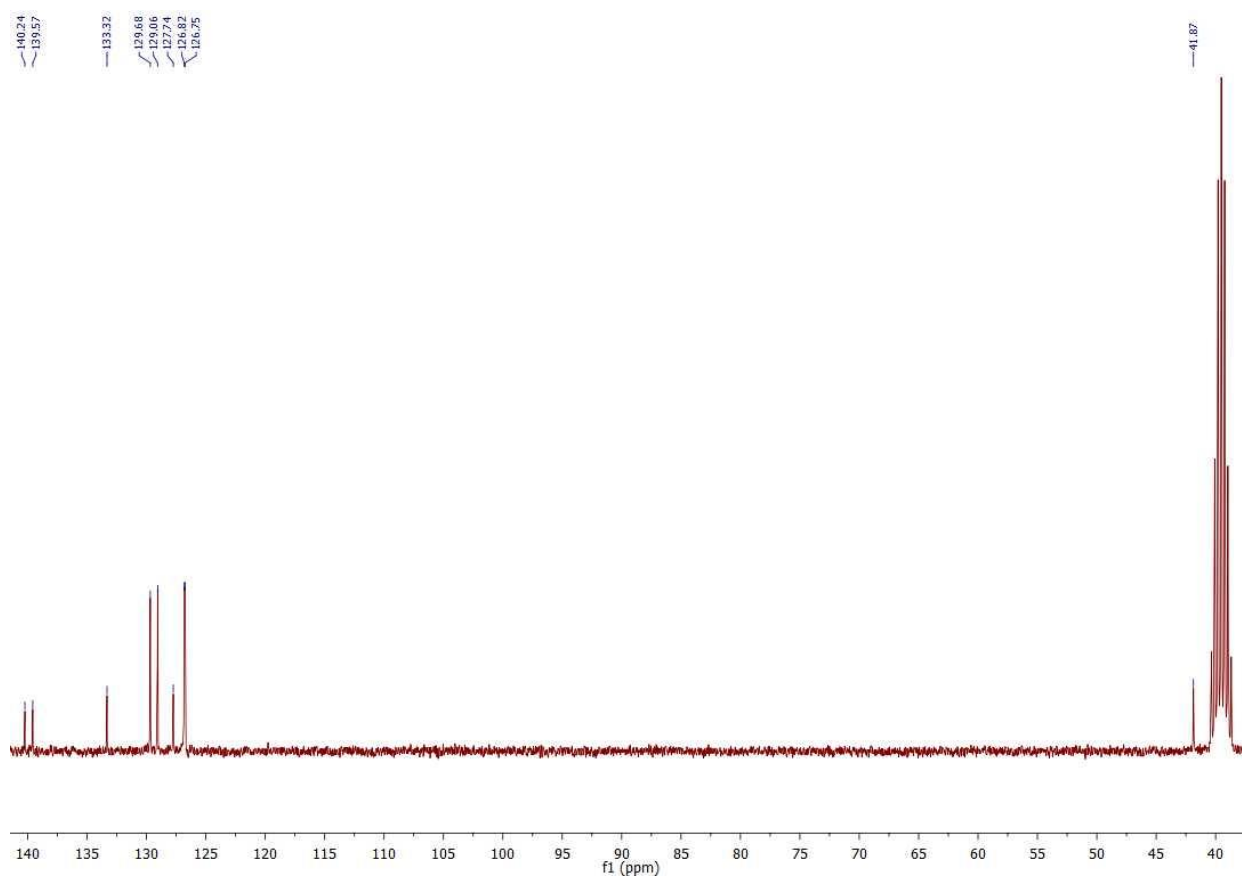

Supplementary Figure 20.  $^1\text{H}$  and  $^{13}\text{C}$  NMR of compound **2d**.

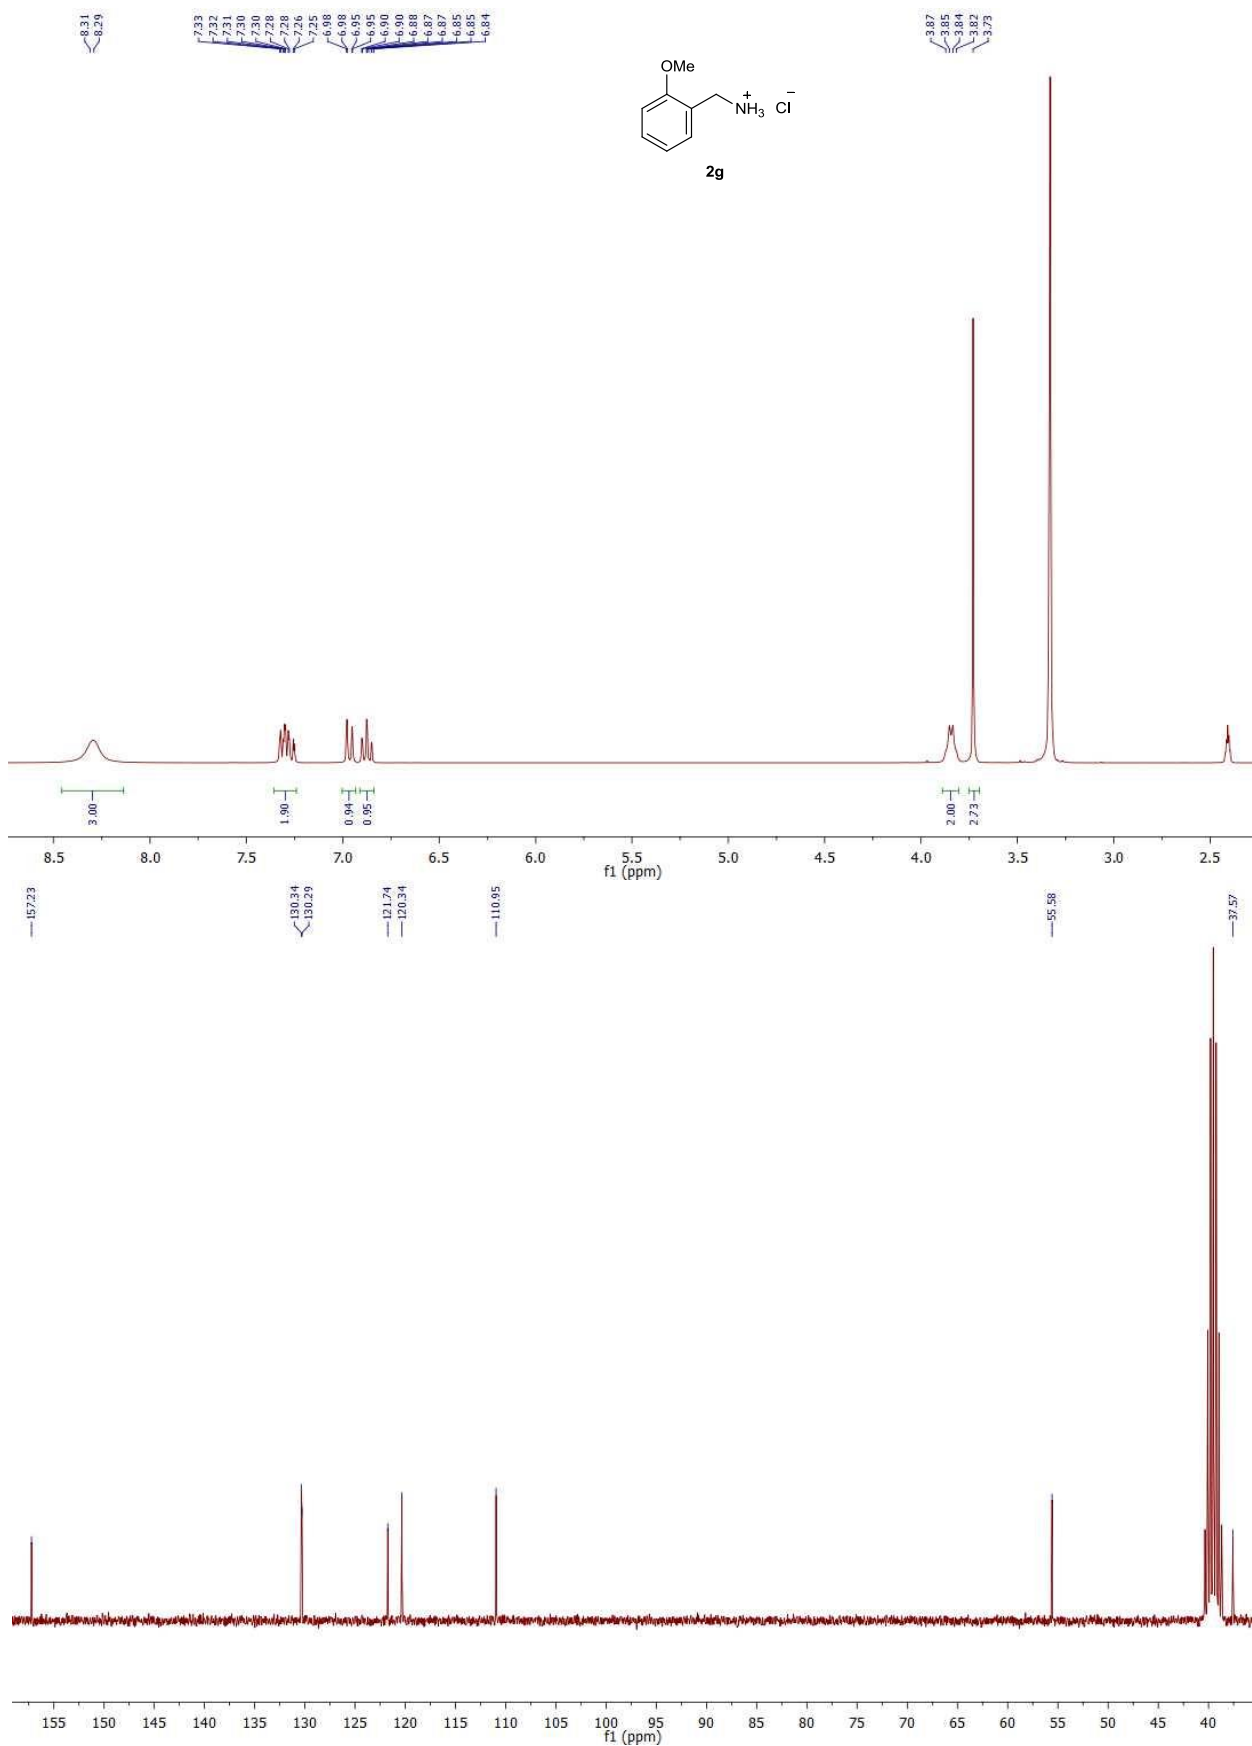

Supplementary Figure 21. <sup>1</sup>H and <sup>13</sup>C NMR of compound **2g**.

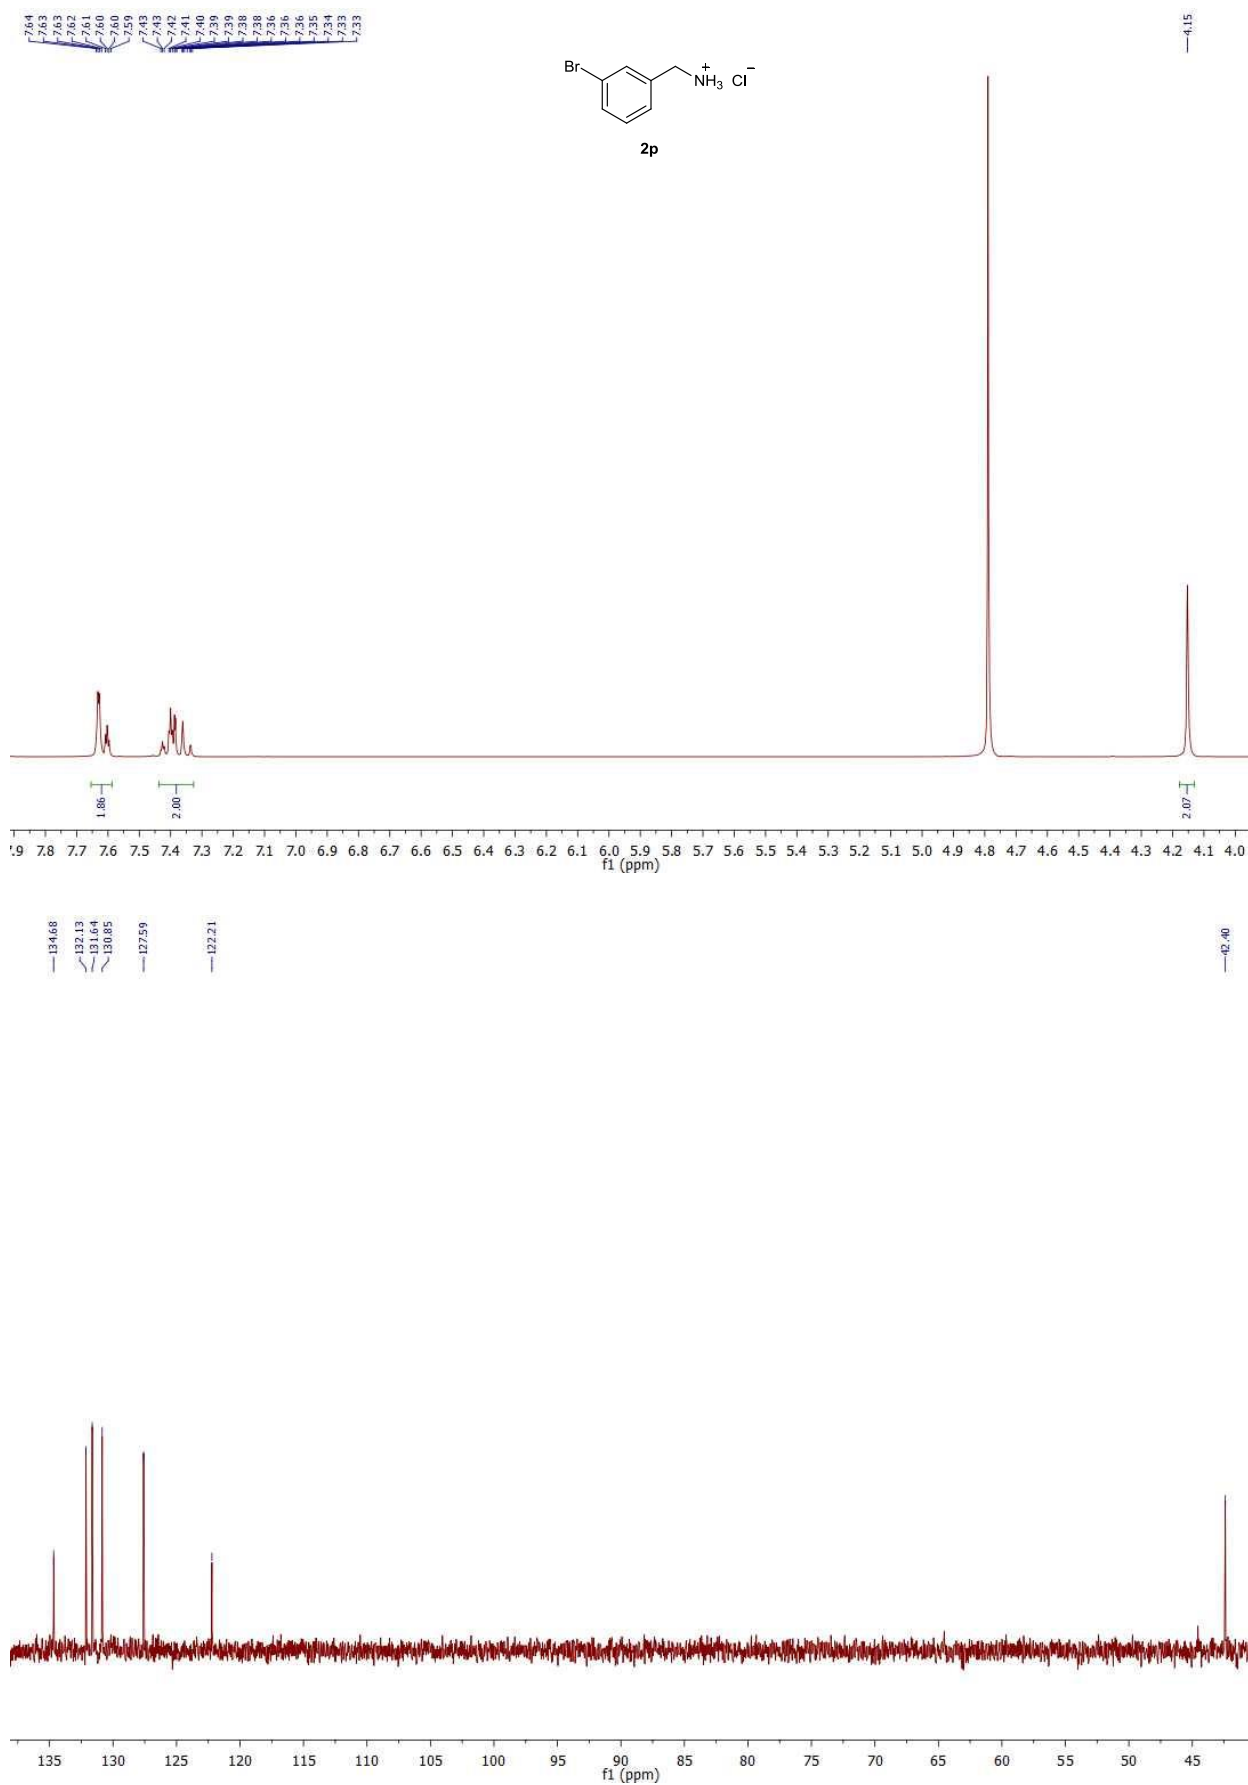

Supplementary Figure 22. <sup>1</sup>H and <sup>13</sup>C NMR of compound **2p**.

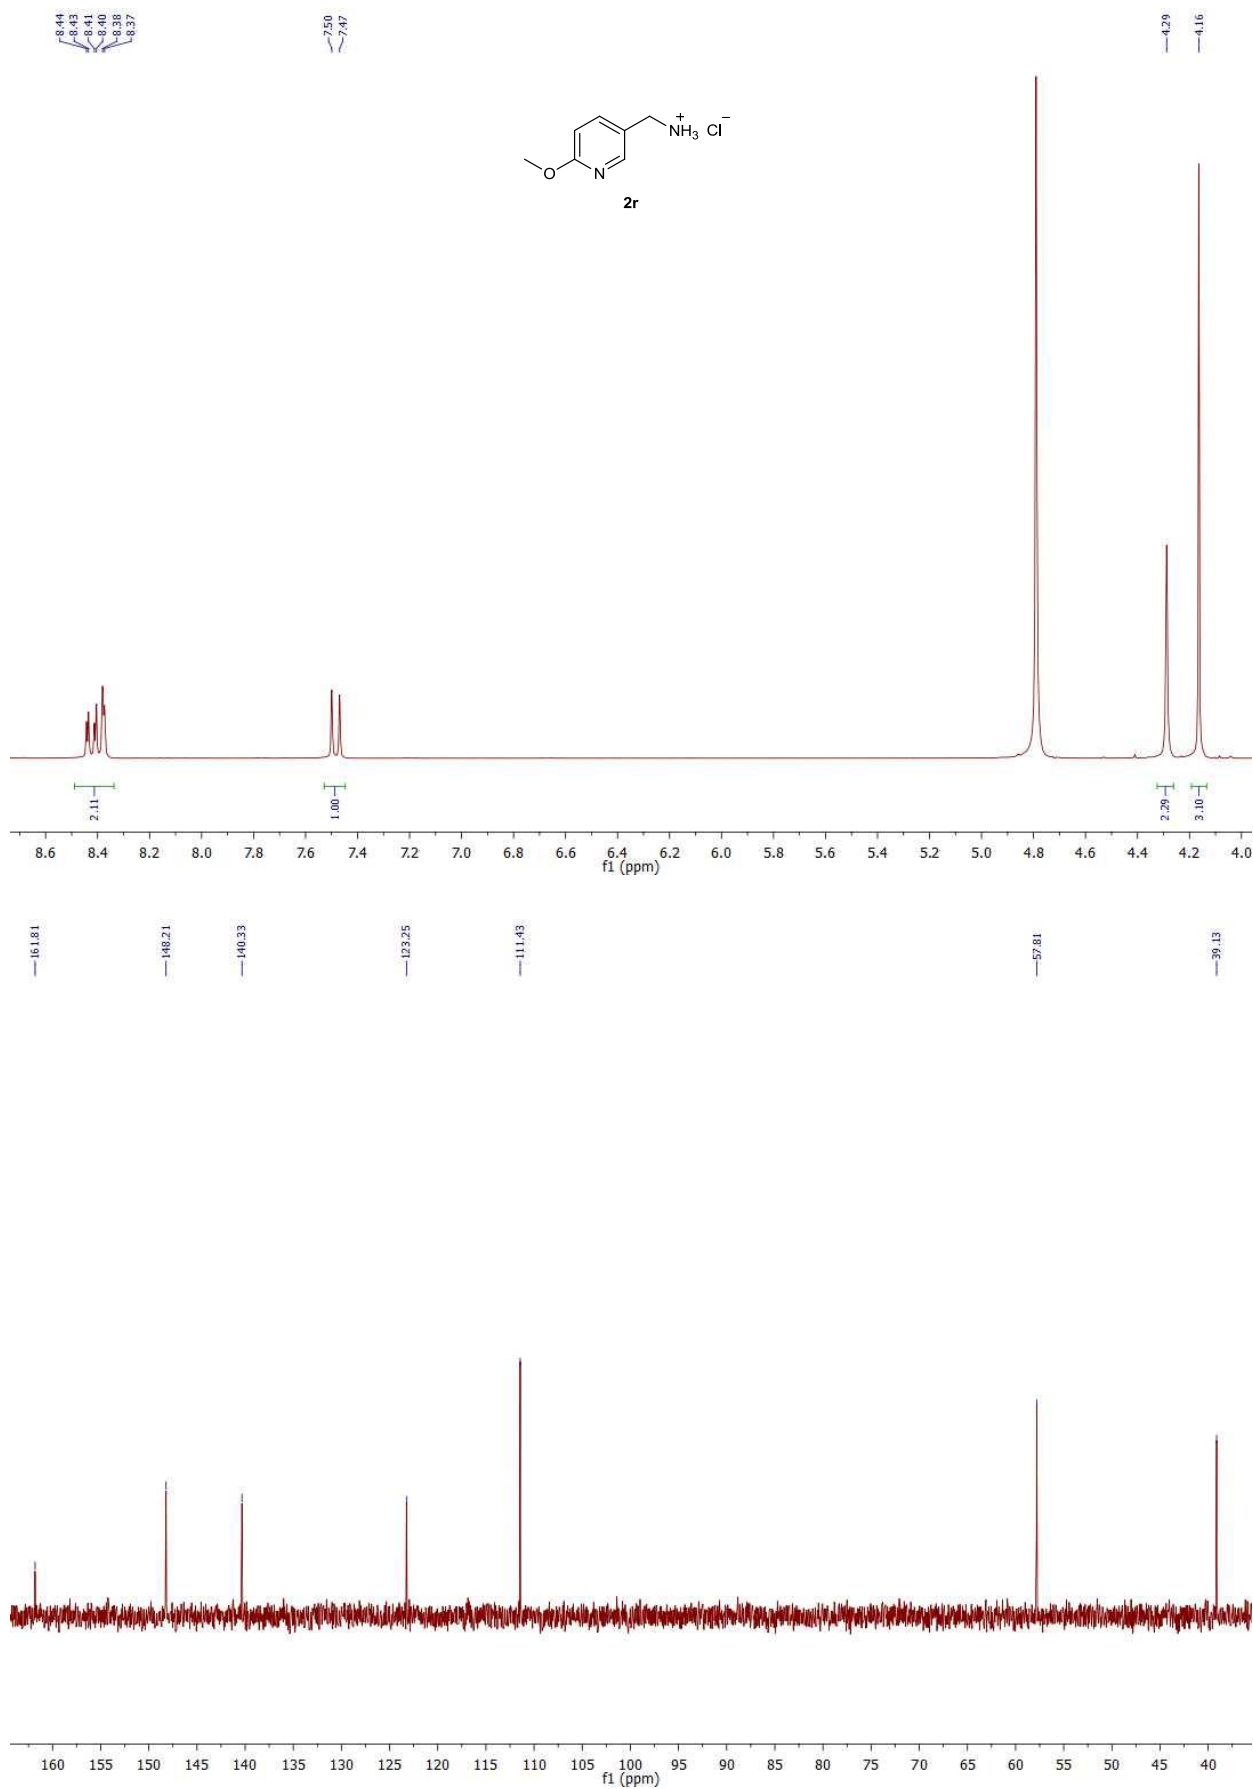

Supplementary Figure 23.  $^1\text{H}$  and  $^{13}\text{C}$  NMR of compound **2r**.

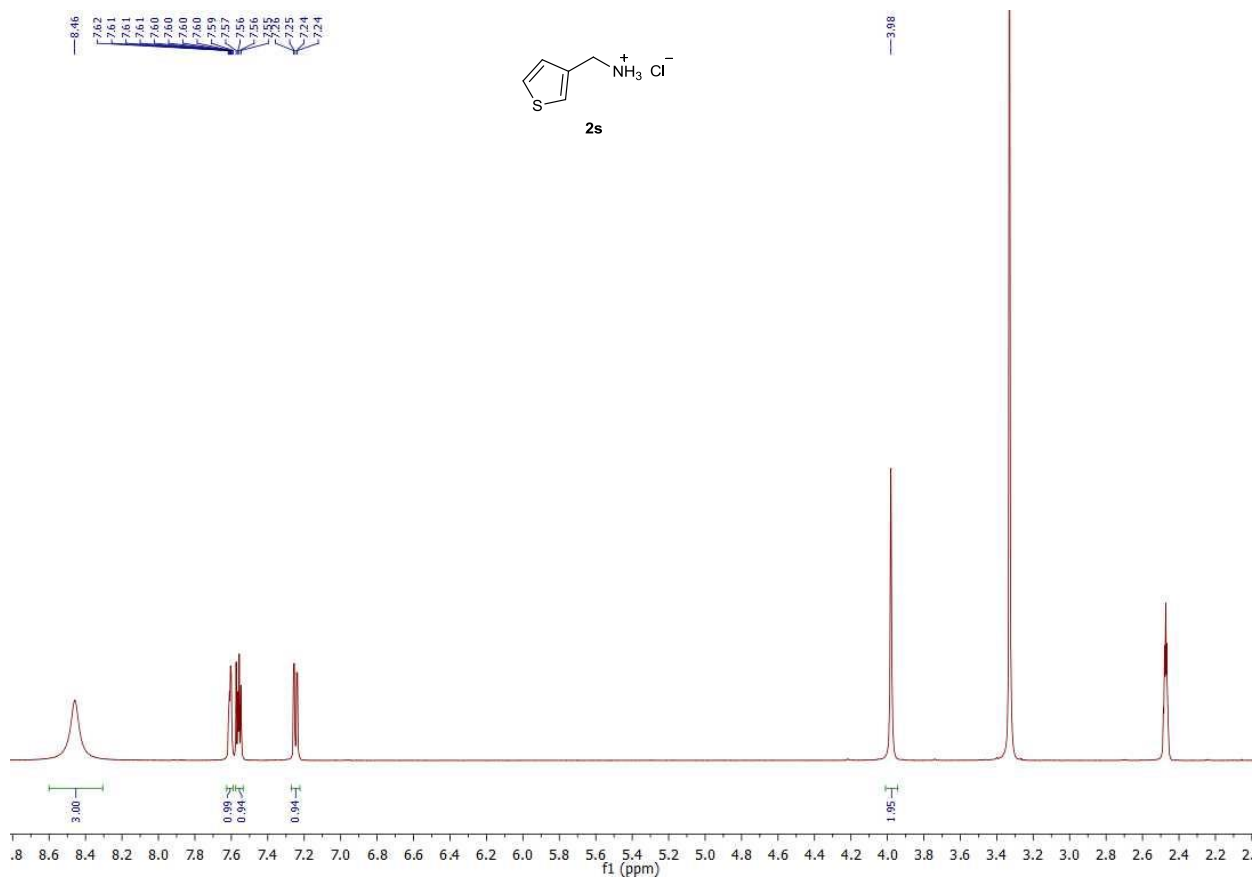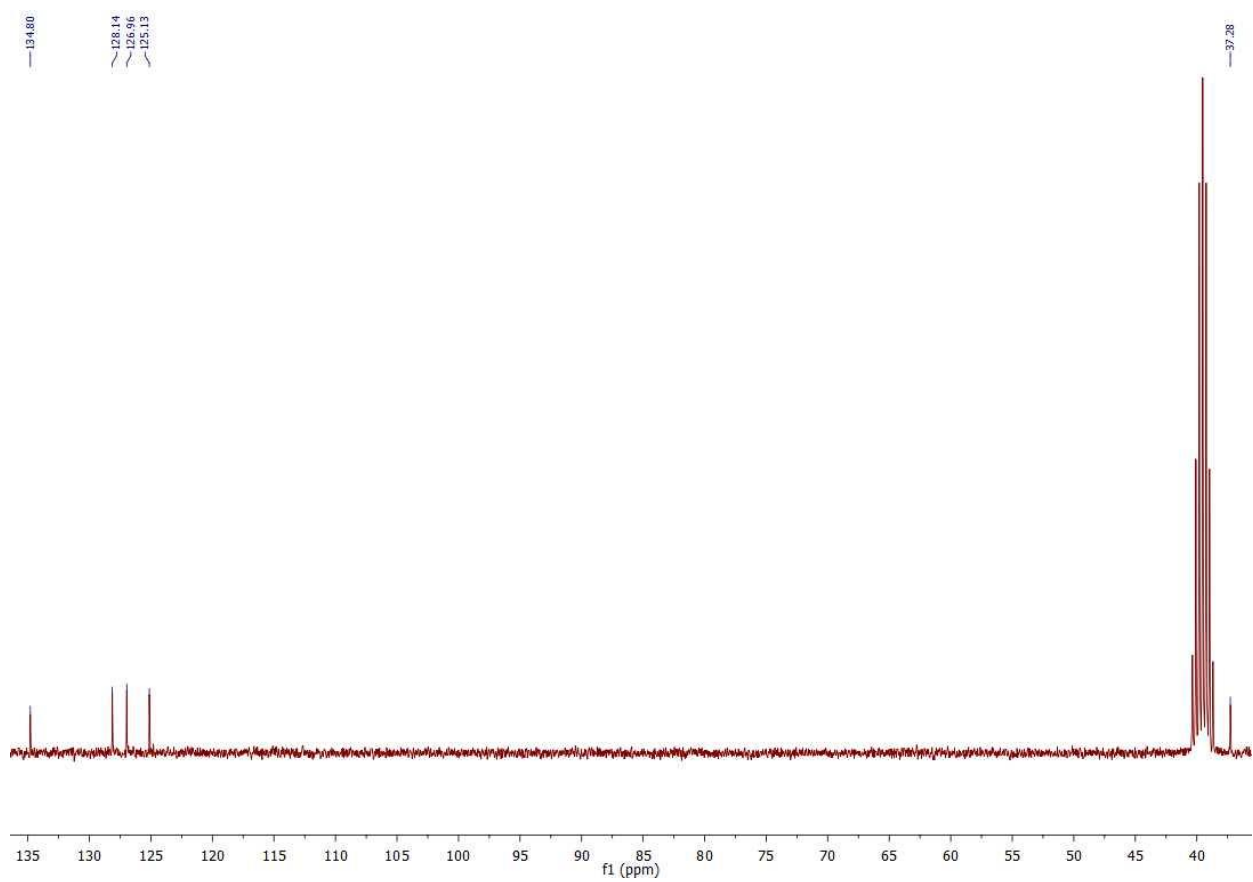

Supplementary Figure 24.  $^1\text{H}$  and  $^{13}\text{C}$  NMR of compound **2s**.

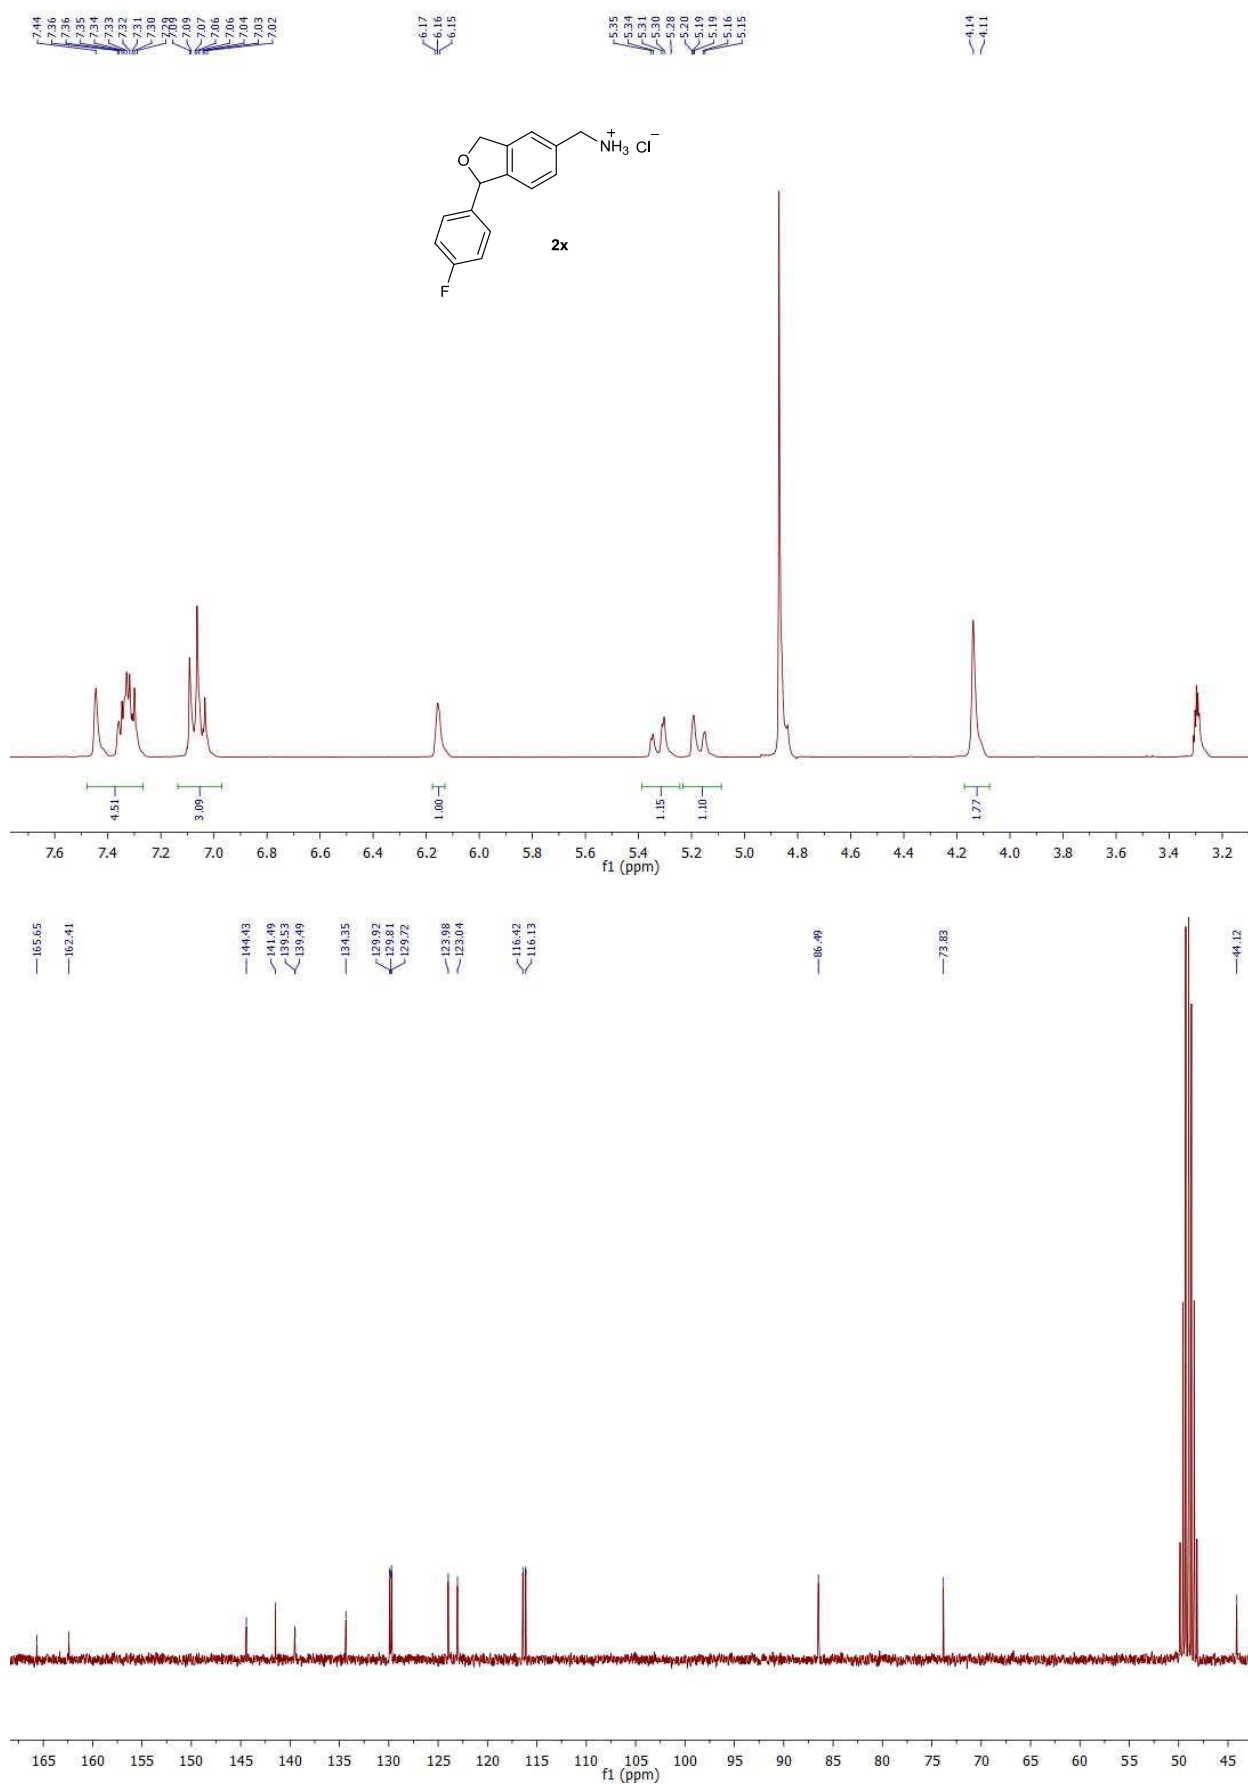

Supplementary Figure 25.  $^1\text{H}$  and  $^{13}\text{C}$  NMR of compound **2x**.

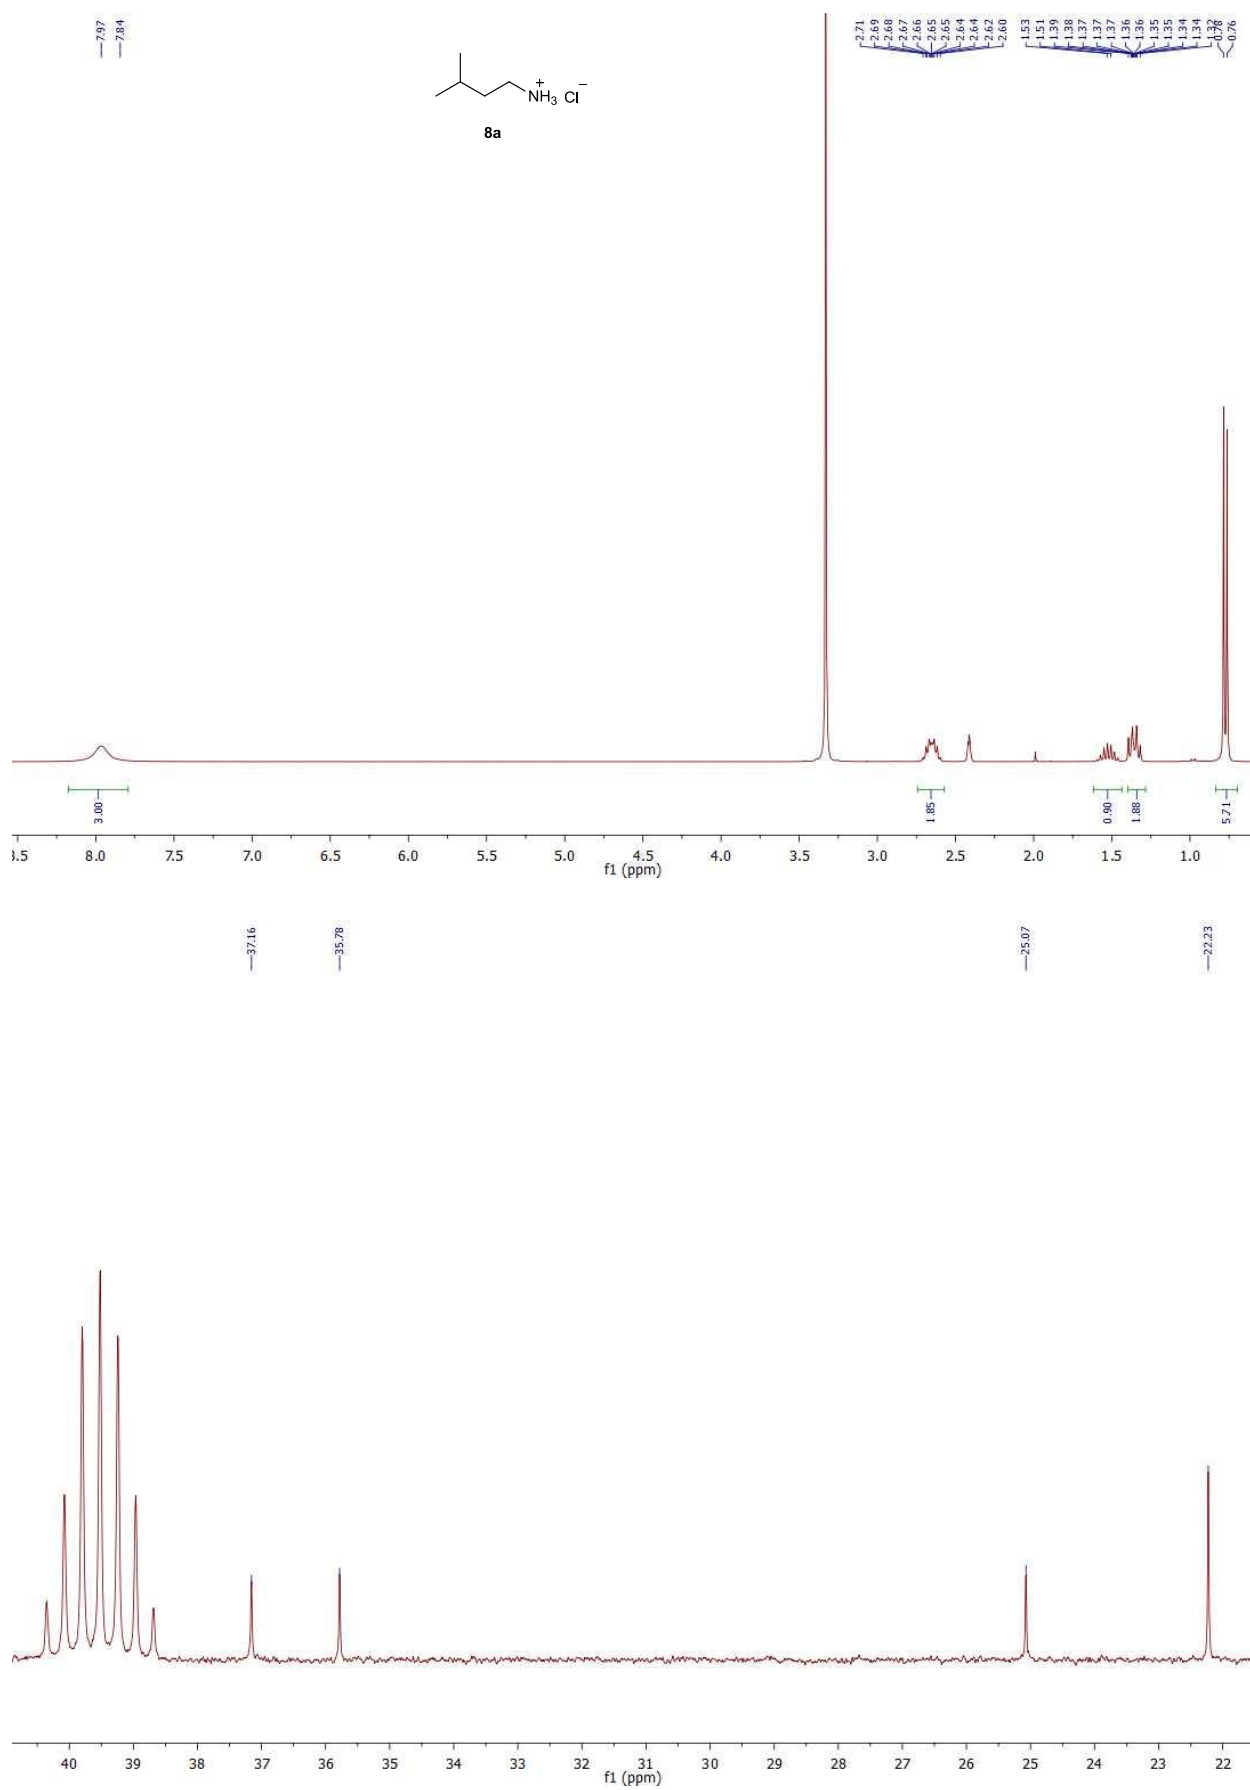

Supplementary Figure 26. <sup>1</sup>H and <sup>13</sup>C NMR of compound **8a**.

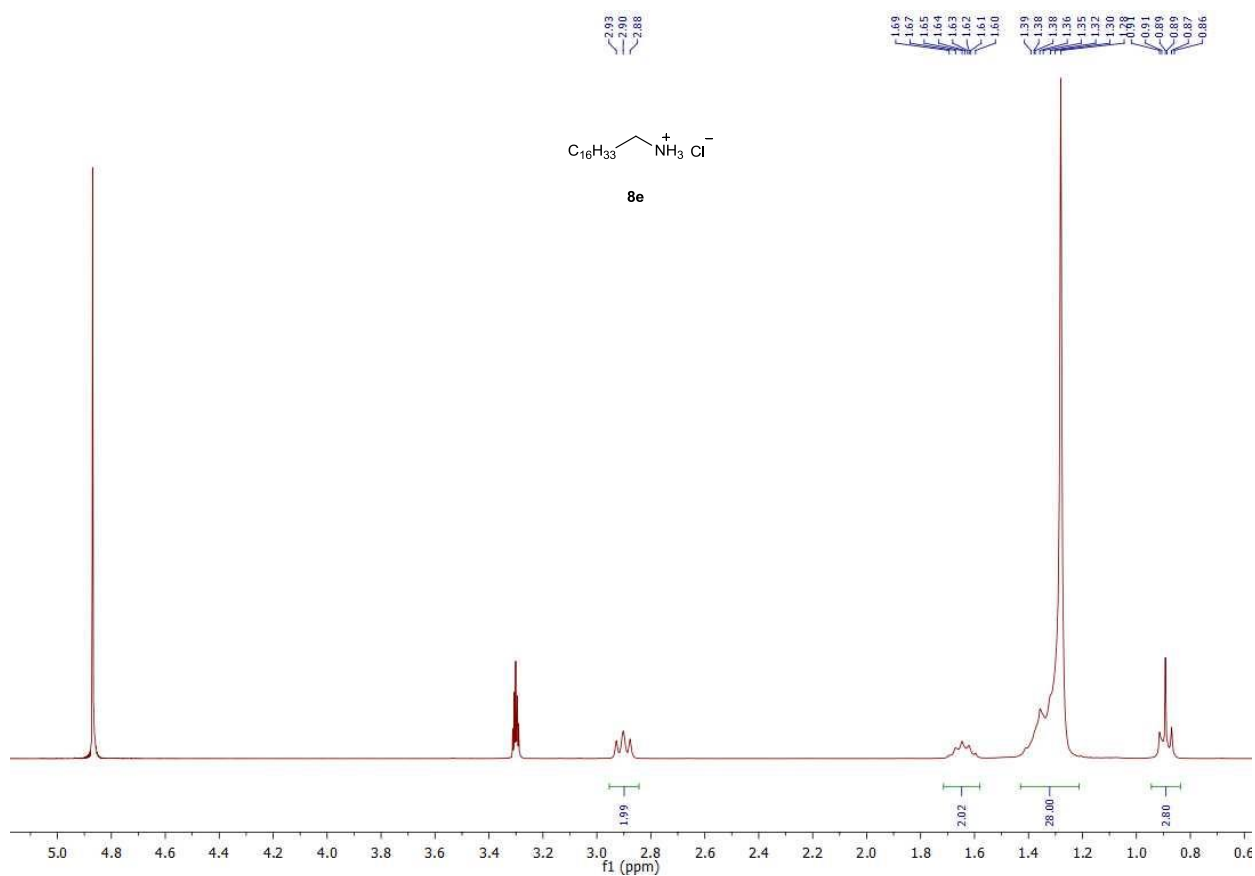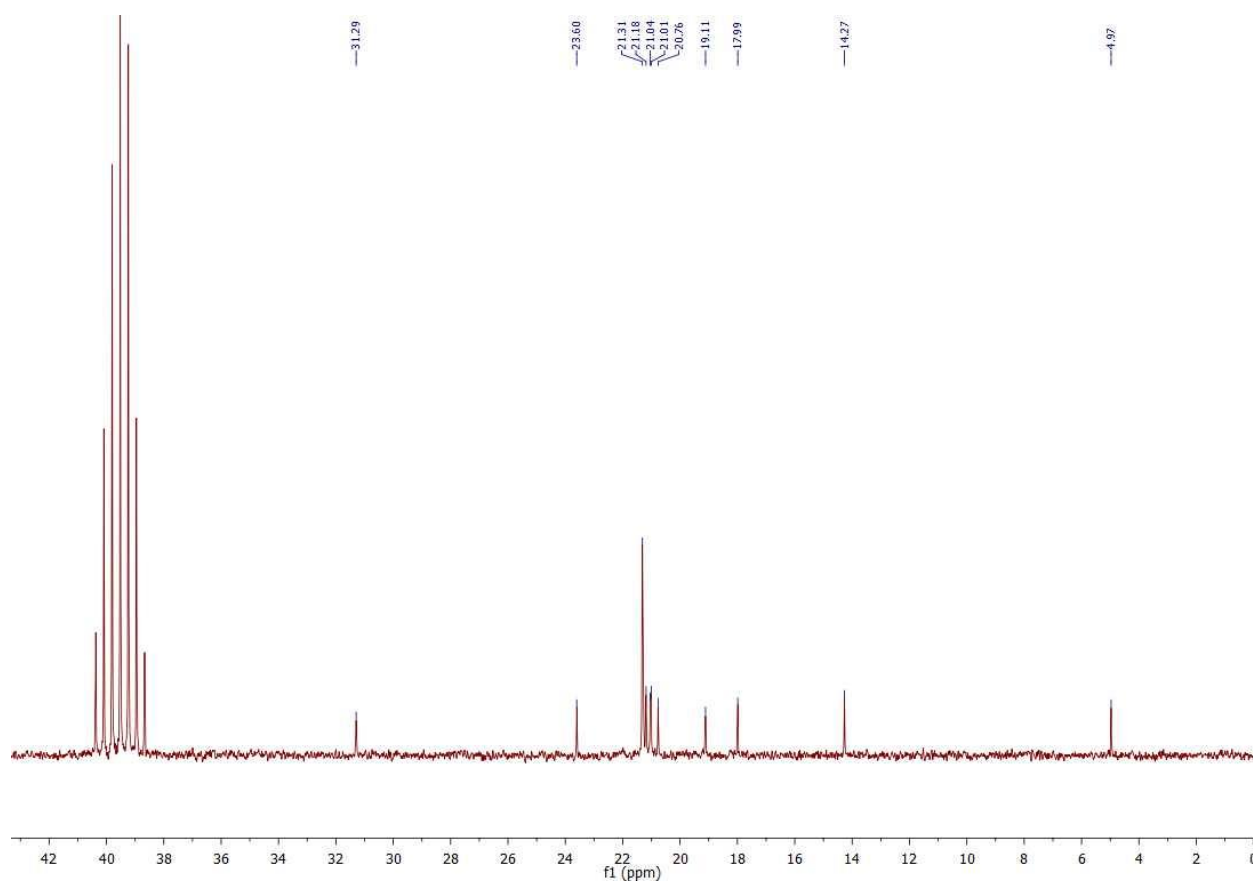

**Supplementary Figure 27.**  $^1\text{H}$  and  $^{13}\text{C}$  NMR of compound **8e**.



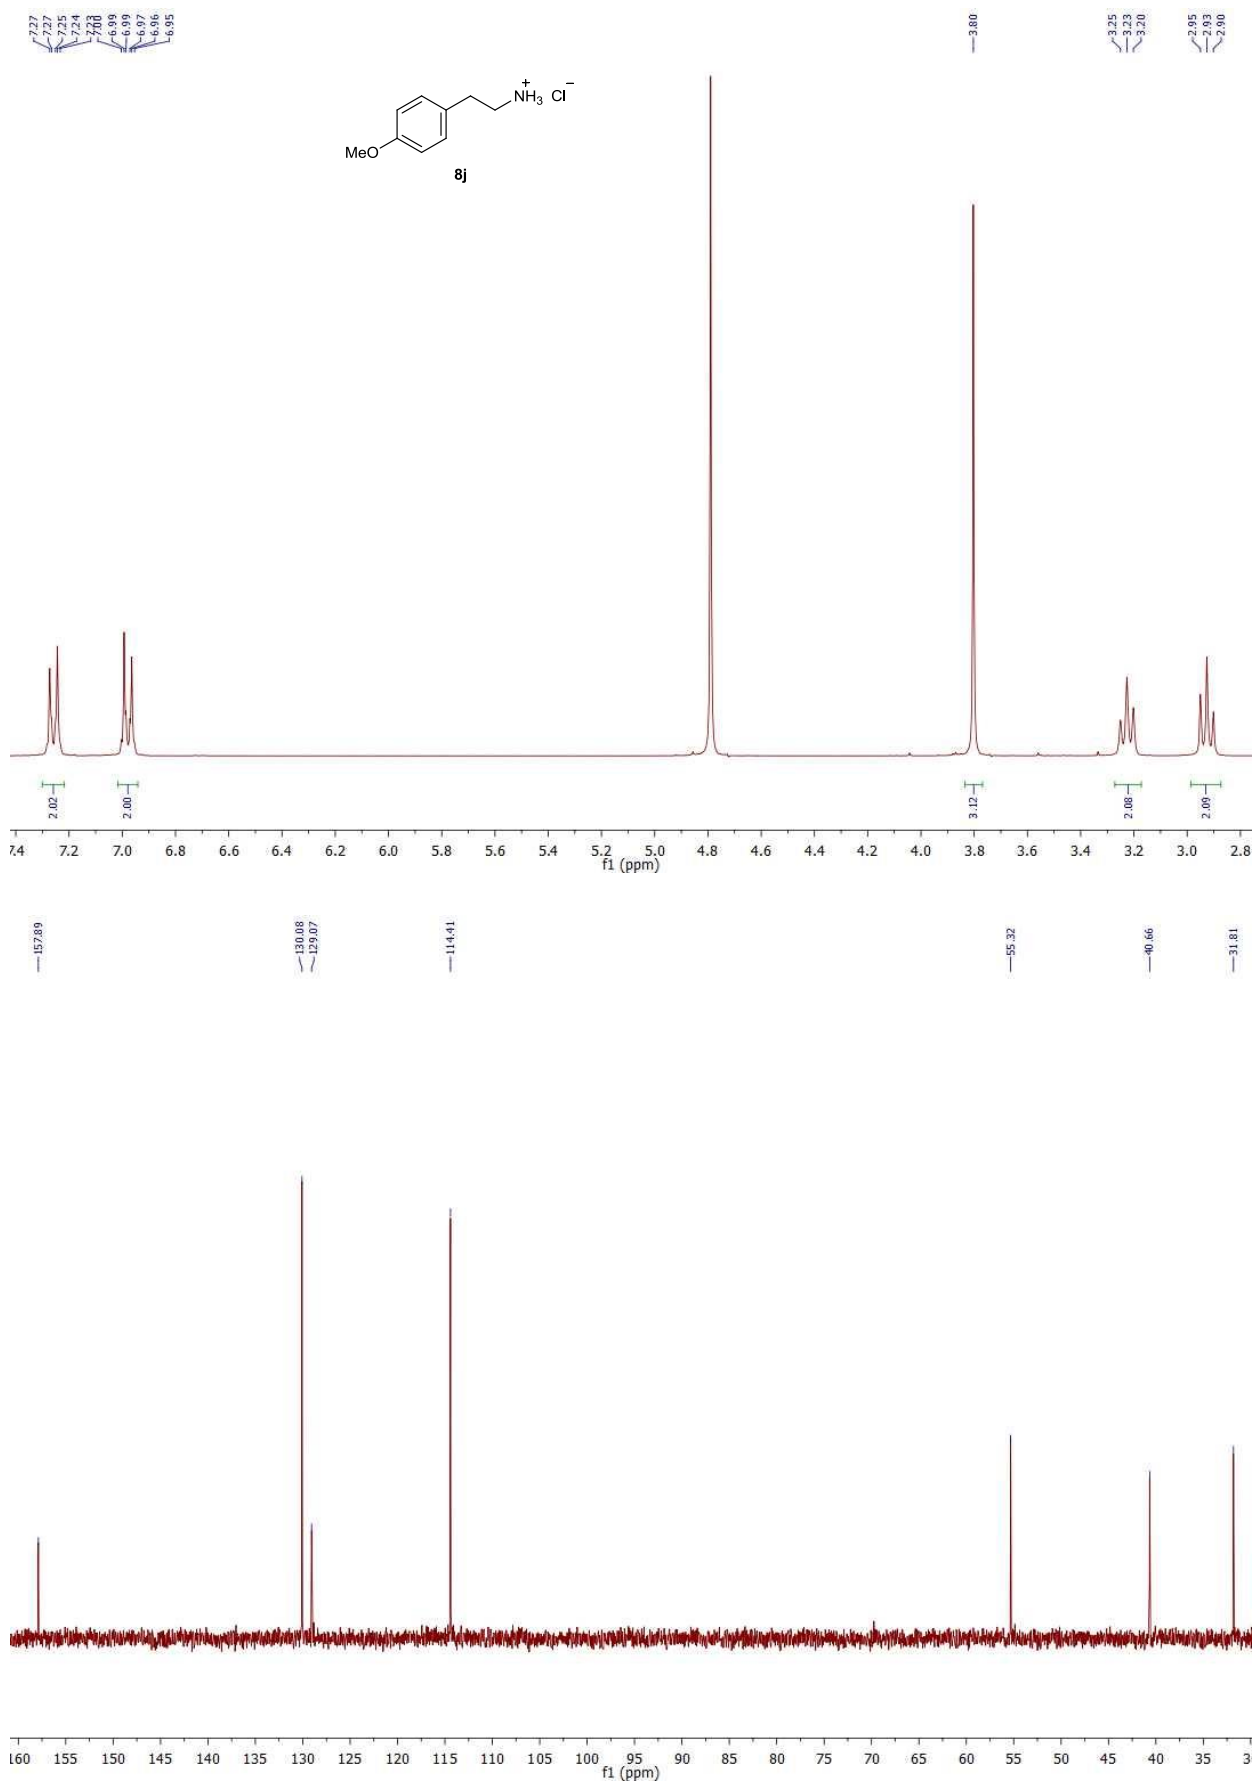

Supplementary Figure 28. <sup>1</sup>H and <sup>13</sup>C NMR of compound **8j**.

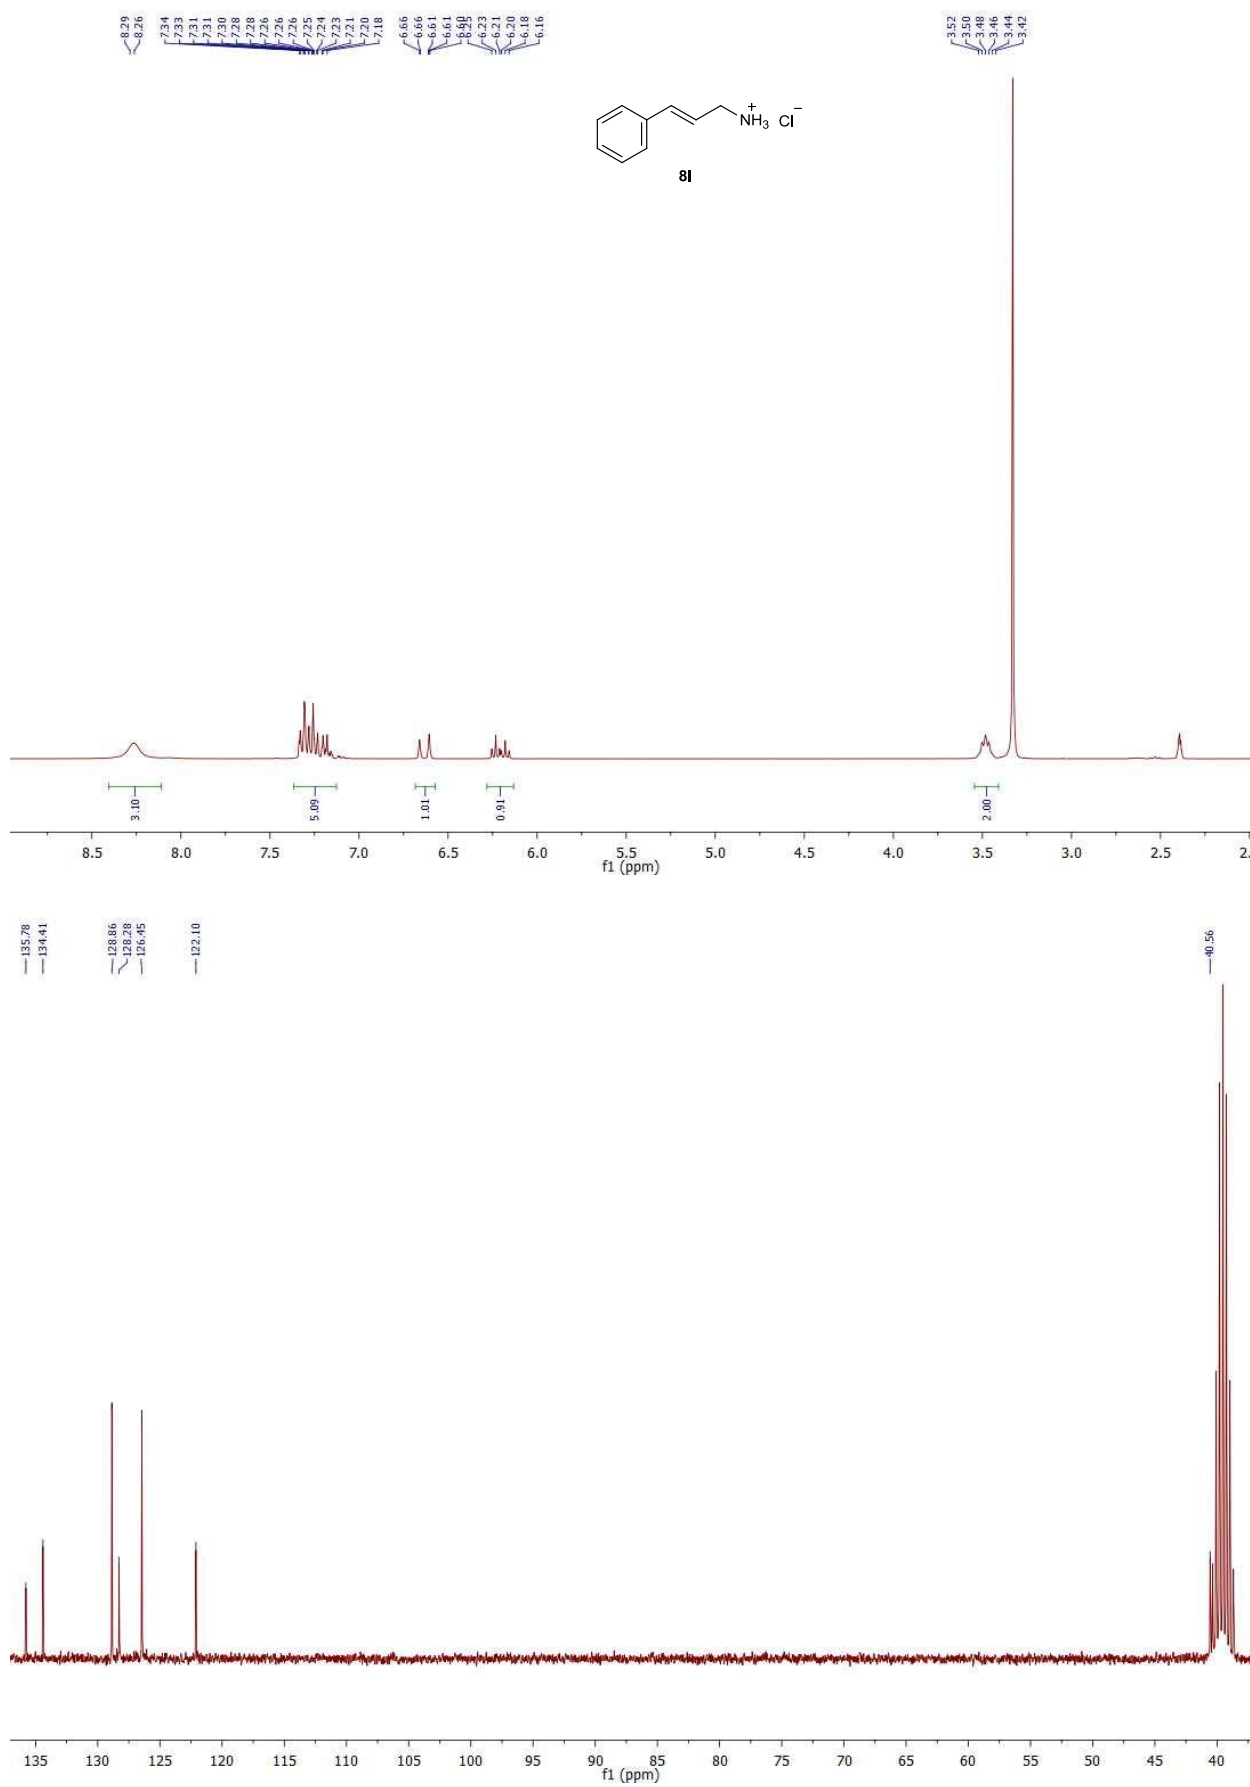

Supplementary Figure 29. <sup>1</sup>H and <sup>13</sup>C NMR of compound **81**.

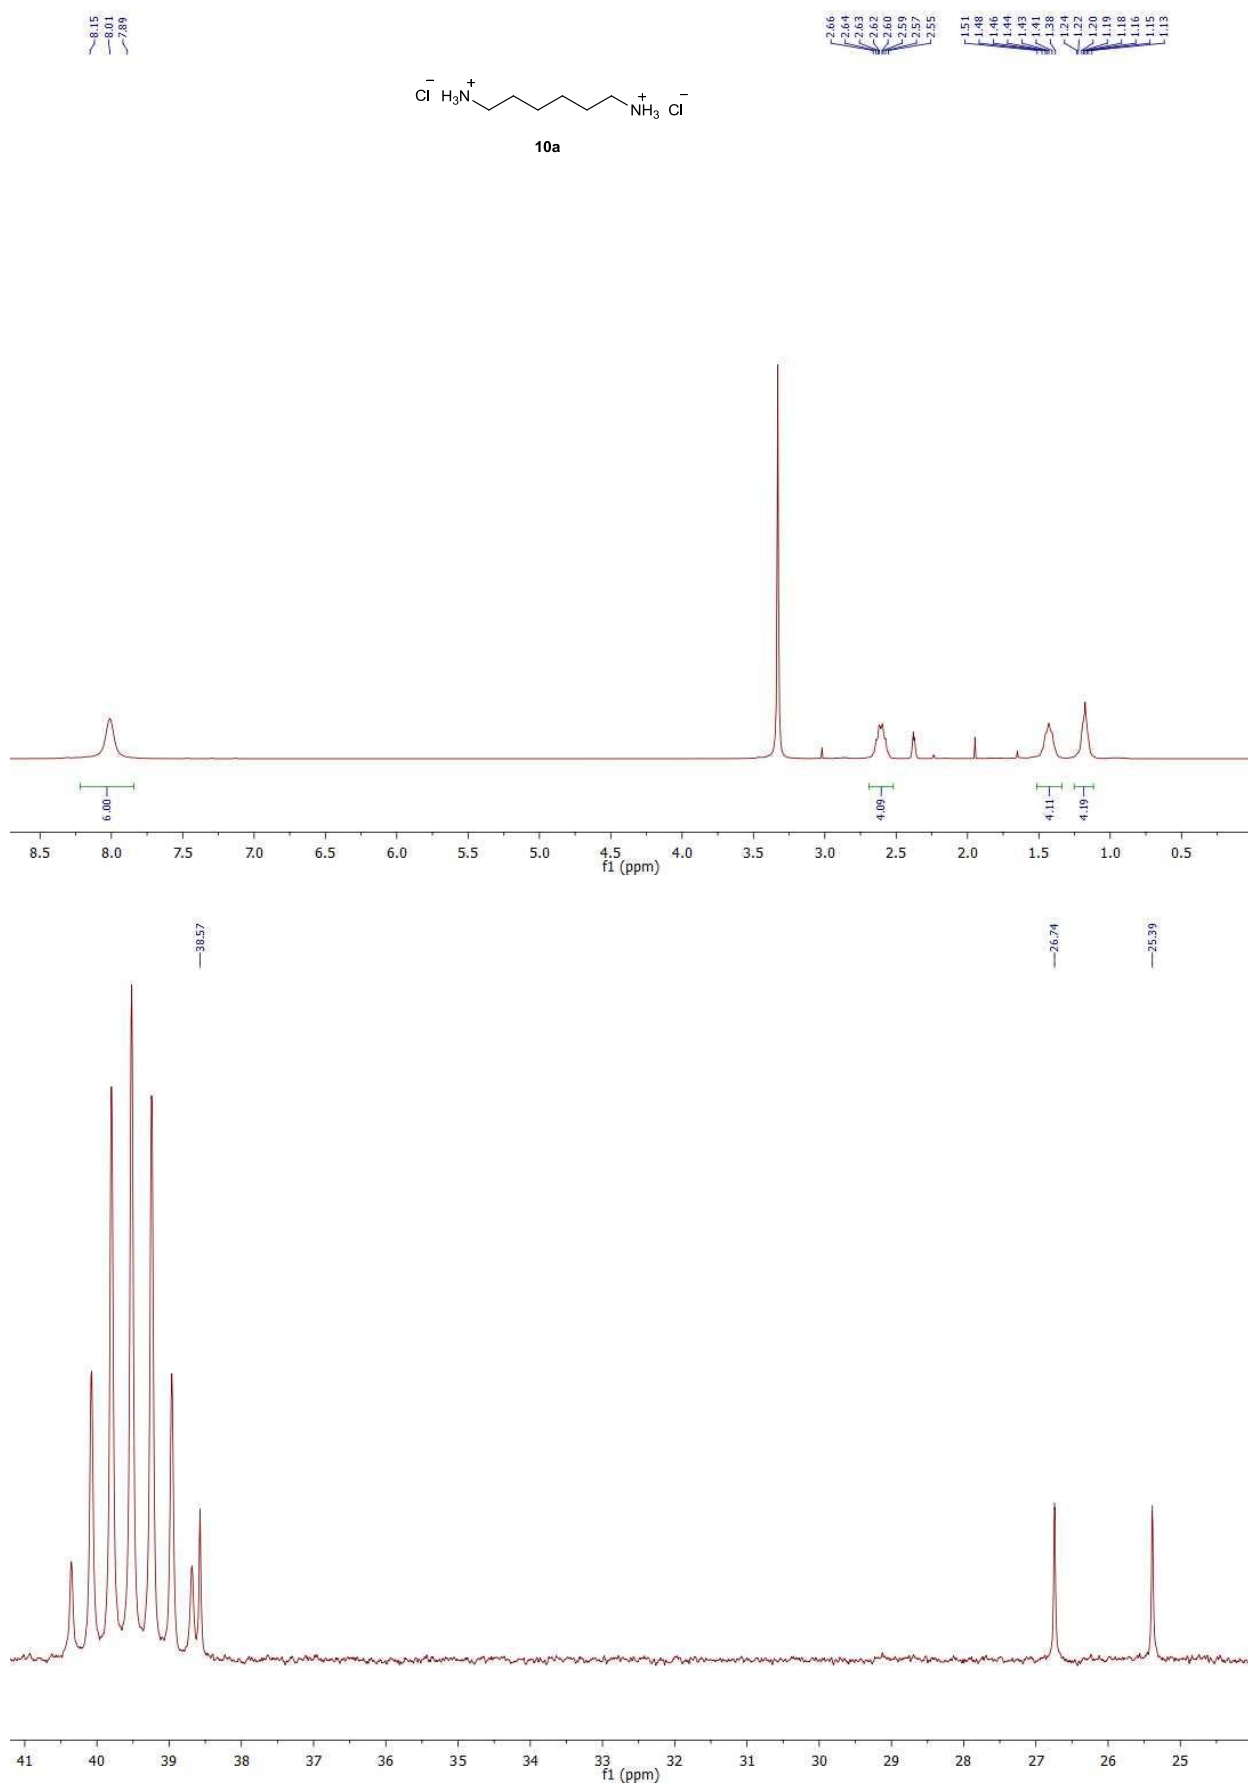

**Supplementary Figure 30.** <sup>1</sup>H and <sup>13</sup>C NMR of compound **10a**.

## 2. Supplementary Methods 1-4

### 2.1 Computational details

Structure optimizations have been carried out at the B3PW91<sup>71</sup> density functional level of theory with the all-electron TZVP basis set<sup>72</sup> by using the Gaussian09 program package.<sup>73</sup> The B3PW91 functional has been identified suitable for iron carbonyl complexes.<sup>74,75</sup> The optimized geometries are characterized as energy minimums at the potential energy surface from frequency calculations at the same level of theory, i.e.; energy minimum structure has only real frequencies or authentic transition state have only one imaginary vibration mode, which connects the reactant and product. The Gibbs free energies which are used for discussion and comparison are scaled with the thermal correction to Gibbs free energies at 298 K. The bonding patterns of complexes **8** and **9** have been analyzed by using the method of Natural Bond Orbital (NBO) analysis.<sup>76</sup>

### 2.2 IR details

IR spectra were recorded on an ATR-FTIR spectrometer (Alpha, Bruker). All spectra were measured with 32 scans at 4 cm<sup>-1</sup> resolution.

For IR investigations, the following reaction was performed before:

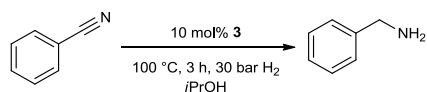

Afterwards, the solvent of the reaction mixture was slowly evaporated. The residue was measured to give Supplementary Figure 2b. The complex **3** was measured as a solid (Supplementary Figure 2a). Benzonitrile and benzyl amine were measured purely as reference without any solvent (Supplementary Figure 2c and d). The reaction residue (spectra 2b) shows also full conversion of benzonitrile as the signal at  $\nu = 2228 \text{ cm}^{-1}$  was not detected.

### 2.3 NMR analysis of Me-3 and intermediates

#### a) Synthesis of [(CH<sub>3</sub>)N((CH<sub>2</sub>CH<sub>2</sub>)P(CH(CH<sub>3</sub>)<sub>2</sub>)<sub>2</sub>)<sub>2</sub>]

<sup>1</sup>H NMR (400.1 MHz, C<sub>6</sub>D<sub>6</sub>):  $\delta = 1.01$  (m, 12 H, <sup>3</sup>J<sub>PH</sub> = 11.2 Hz, <sup>3</sup>J<sub>HH</sub> = 7.0 Hz, PCH(CH<sub>3</sub>)<sub>2</sub>), 1.04 (m, 12 H, <sup>3</sup>J<sub>PH</sub> = 13.9 Hz, <sup>3</sup>J<sub>HH</sub> = 7.1 Hz, PCH(CH<sub>3</sub>)<sub>2</sub>), 1.57 (m, 4H, <sup>2</sup>J<sub>PH</sub> = 2.8 Hz, PCH<sub>2</sub>), 1.59 (m, 4H, <sup>2</sup>J<sub>PH</sub> = 2.1 Hz, <sup>3</sup>J<sub>HH</sub> = 7.1 Hz, PCH(CH<sub>3</sub>)<sub>2</sub>), 2.20 (s, 3 H, NCH<sub>3</sub>), 2.64 (m, 4H, <sup>3</sup>J<sub>PH</sub> = 5.6 Hz, NCH<sub>2</sub>); <sup>13</sup>C NMR (100.6 MHz, C<sub>6</sub>D<sub>6</sub>):  $\delta = 18.99$  (d, <sup>2</sup>J<sub>CP</sub> = 9.9 Hz, PCH(CH<sub>3</sub>)<sub>2</sub>), 20.24 (d, <sup>1</sup>J<sub>CP</sub> = 19.5 Hz, PCH<sub>2</sub>), 20.30 (d, <sup>2</sup>J<sub>CP</sub> = 16.5 Hz, PCH(CH<sub>3</sub>)<sub>2</sub>), 23.67 (d, <sup>1</sup>J<sub>CP</sub> = 14.0 Hz, PCH(CH<sub>3</sub>)<sub>2</sub>), 41.75 (s, N(CH<sub>3</sub>)), 56.84 (d, <sup>2</sup>J<sub>CP</sub> = 28.6 Hz, NCH<sub>2</sub>), <sup>31</sup>P{<sup>1</sup>H} NMR (161.9 MHz, C<sub>6</sub>D<sub>6</sub>):  $\delta = 1.0$  (s, 95.7 %), -11.8 (s, 4.3 %, unknown impurity).

## **b) Synthesis of $\{Fe(H)(HBH_3)[(CH_3)N((CH_2CH_2)P(CH(CH_3)_2)_2)_2]\}$**

**$^1H$  NMR** (300.1 MHz,  $C_6D_6$ ):  $\delta = -36.07$  (bs, 1 H,  $FeH$ ),  $-23.04$  (t, 1 H,  $FeH$ ,  $J_{HP} = 53.2$  Hz),  $-12.09$  (bs, 1 H,  $FeH$ ),  $0.77$ - $1.49$  (overlapped m, 35 H),  $2.38$  (m, 2 H),  $2.96$  (m, 2 H),  $4.49$  (b, 2 H,  $FeH$ );  **$^{13}C$  NMR** (75.5 MHz,  $C_6D_6$ ):  $\delta = 17.3$ ,  $19.1$ ,  $19.3$ ,  $20.5$ ,  $19.8$ ,  $21.9$ ,  $26.2$ ,  $50.1$ ,  $65.9$ ;  **$^{31}P\{^1H\}$  NMR** (121.0 MHz,  $C_6D_6$ ):  $\delta = 96.7$  (s, 99.6 %),  $0.9$  (s, 0.4 %, free ligand)

## **c. Synthesis of $\{Fe(H)(HBH_3)(CO)[(CH_3)N((CH_2CH_2)P(CH(CH_3)_2)_2)_2]\}$**

$\{Fe(H)(HBH_3)(CO)[(CH_3)N((CH_2CH_2)P(CH(CH_3)_2)_2)_2]\}$  (mixture of two isomers, major isomer ~ 90%, minor isomer 10% according to  $^{31}P\{^1H\}$  NMR) Because of extensive overlap only a few peaks could be assigned in the  $^1H$  NMR.  **$^1H$  NMR** (300.1 MHz,  $C_6D_6$ ):  $\delta = -20.08$  (t, 1 H,  $FeH$ ,  $J_{HP} = 51.4$  Hz, min),  $-19.51$  (t, 1 H,  $FeH$ ,  $J_{HP} = 52.1$  Hz, maj),  $-2.62$  ppm (b, 4 H,  $FeH$ ),  $0.88$ - $0.95$  (m,  $PCH(CH_3)_2$ , maj),  $1.08$ - $1.14$  (m,  $PCH(CH_3)_2$ , maj),  $1.18$ - $1.25$  (m,  $PCH(CH_3)_2$ , maj),  $1.67$ - $1.75$  (m,  $PCH(CH_3)_2$ , maj),  $1.97$  (s,  $NCH_3$ , maj),  $2.13$  (s,  $NCH_3$ , min),  $2.92$ - $2.99$  (m, 2H, maj),  $3.22$  (b, 2H, min);  **$^{13}C$  NMR** (75.5 MHz,  $C_6D_6$ ):  $\delta$  (maj) =  $18.12$ ,  $19.22$ ,  $20.62$ ,  $21.02$ ,  $25.37$ ,  $25.53$ ,  $28.14$ ,  $30.71$ ,  $50.65$ ,  $65.56$  (The peak of coordinated CO could not be detected, however evidence of its presence was obtained by means of IR);  **$^{31}P\{^1H\}$  NMR** (121.0 MHz,  $C_6D_6$ ):  $\delta = 92.9$  (s, maj);  $97.2$  (s, min). **IR ATR**:  $\bar{\nu}$  [ $cm^{-1}$ ]  $2369$  (m,  $\nu$  BH),  $2327$  (m,  $\nu$  BH),  $2054$ , (br,  $\nu$  BH),  $1851$  (m,  $\nu$  CO),  $1901$  (s,  $\nu$  CO),  $1050$  (s,  $\delta$  BH<sub>3</sub>). **ESI-HRMS** ( $m/z$ , pos): Calculated for  $[C_{17}H_{40}FeNP_2]$   $376.198$ ; found:  $376.19808$   $[M-BH_4-CO]^+$ .

## **2.4 Analysis of $^1H$ and $^{13}C$ NMR spectra**

### **Aromatic and heteroaromatic products 2:**

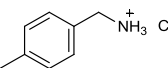  **$p$ -tolylmethan ammonium chloride (2b).**  **$^1H$  NMR** (300.1 MHz,  $DMSO-d_6$ ):  $\delta = 2.22$  (s, 3 H),  $3.86$  (s, 3 H),  $7.08$ - $7.16$  (m, 2 H),  $7.25$ - $7.33$  (m, 2 H),  $8.39$  (s, 3 H).  **$^{13}C$  NMR** (75.5 MHz,  $DMSO-d_6$ )  $\delta = 20.8$ ,  $42.0$ ,  $129.0$ ,  $129.1$ ,  $131.1$ ,  $137.8$ . **GCMS-EI** (70eV):  $m/z$  (%) =  $121$  ( $M^+$ , 33),  $120$  (86),  $106$  (58),  $105$  (24),  $103$  (100),  $93$  (36),  $91$  (37),  $79$  (14),  $77$  (24),  $36$  (12). **HRMS** (ESI-TOF,  $m/z$ ) calcd. for  $C_8H_{11}N$  ( $M+H$ )<sup>+</sup>  $122.0964$ ; found  $122.0965$ .

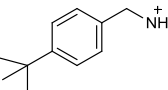 **(4-(*tert*-butyl)phenyl)methan ammonium chloride (2c).**  **$^1H$  NMR** (300.1 MHz,  $DMSO-d_6$ ):  $\delta = 1.17$  (s, 9 H),  $3.77$ - $3.92$  (m, 2 H),  $7.29$ - $7.36$  (m, 4 H),  $8.43$  (s, 3 H).  **$^{13}C$  NMR** (75.5 MHz,  $DMSO-d_6$ )  $\delta = 31.1$ ,  $34.4$ ,  $41.9$ ,  $125.4$ ,  $128.9$ ,  $131.2$ ,  $151.0$ . **GCMS-EI** (70eV):  $m/z$  (%) =  $163$  ( $M^+$ , 6),  $162$  (18),  $148$  (44),  $132$  (13),  $131$  (13),  $115$  (10),  $106$  (100),  $91$  (21),  $79$  (11),  $77$  (12),  $30$  (17). **HRMS** (EI,  $m/z$ ) calcd. for  $C_{11}H_{17}N$  ( $M+$ )<sup>+</sup>  $164.1434$ ; found  $164.1436$ .

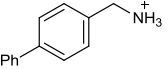 **[1,1'-biphenyl]-4-ylmethan ammonium chloride (2d).**  **$^1H$  NMR** (300.1 MHz,  $DMSO-d_6$ ):  $\delta = 3.95$  (s, 2 H),  $7.20$ - $7.75$  (m, 9 H),  $8.51$  (s, 3 H).  **$^{13}C$  NMR** (75.5 MHz,  $DMSO-d_6$ )  $\delta = 41.9$ ,  $126.7$ ,  $126.8$ ,  $129.1$ ,  $129.7$ ,  $133.3$ ,  $139.6$ ,  $140.2$ . **GCMS-EI** (70eV):  $m/z$  (%) =  $183$  ( $M^+$ , 56),  $182$  (100),  $167$  (31),  $166$  (78),  $165$  (51),  $155$  (39),  $154$  (26),  $153$  (41),  $152$  (60),  $151$  (18),  $128$  (13),  $115$  (14),  $106$  (38),  $77$  (27),  $63$  (11),  $51$  (13),  $30$  (22). **HRMS** (EI,  $m/z$ ) calcd. for  $C_{13}H_{12}N$  ( $M$ )<sup>+</sup>  $182.0964$ ; found  $182.0963$ .

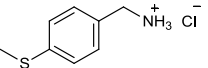 **(4-(methylthio)phenyl)methan ammonium chloride (2e).**<sup>77</sup> **<sup>1</sup>H NMR** (300.1 MHz, DMSO-d<sub>6</sub>): δ = 2.44 (s, 3 H), 4.03 (s, 2 H), 7.23-7.30 (m, 2 H), 7.30-7.38 (m, 2 H). **<sup>13</sup>C NMR** (75.5 MHz, DMSO-d<sub>6</sub>) δ = 15.2, 127.6, 130.6, 130.8, 141.9.

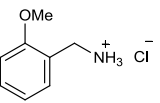 **(2-methoxyphenyl)methan ammonium chloride (2g).** **<sup>1</sup>H NMR** (300.1 MHz, DMSO-d<sub>6</sub>): δ = 3.73 (s, 3 H), 3.80-3.89 (m, 2 H), 6.34-6.91 (m, 1 H), 6.94-7.00 (m, 1 H), 7.22-7.36 (m, 2 H), 8.30 (s, 3 H). **<sup>13</sup>C NMR** (75.5 MHz, DMSO-d<sub>6</sub>) δ = 37.6, 55.6, 111.0, 120.3, 121.7, 130.3, 130.3, 157.2. **GCMS-EI** (70eV): m/z (%) = 137 (M<sup>+</sup>, 67), 136 (100), 122 (15), 121 (36), 120 (22), 119 (11), 108 (10), 107 (13), 106 (39), 104 (22), 93 (10), 91 (30), 78 (24), 77 (25), 65 (13), 63 (20), 51 (12), 36 (23). **HRMS** (ESI-TOF, m/z) calcd. for C<sub>8</sub>H<sub>11</sub>NO (M+H)<sup>+</sup> 138.0913; found 138.0911.

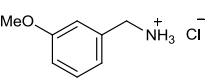 **(3-methoxyphenyl)methan ammonium chloride (2h).** **<sup>1</sup>H NMR** (300.1 MHz, DMSO-d<sub>6</sub>): δ = 2.60 (s, 3 H), 2.98-3.10 (m, 2 H), 5.96-6.04 (m, 1 H), 6.09-6.16 (m, 1 H), 6.20-6.27 (m, 1 H), 6.33-6.42 (m, 1 H), 7.65 (s, 3 H). **<sup>13</sup>C NMR** (75.5 MHz, DMSO-d<sub>6</sub>) δ = 42.1, 55.3, 144.0, 114.5, 121.0, 129.7, 135.6, 159.4. **GCMS-EI** (70eV): m/z (%) = 137 (M<sup>+</sup>, 58), 136 (100), 122 (13), 121 (19), 120 (12), 94 (33), 93 (19), 92 (13), 91 (15), 79 (15), 78 (21), 77 (37), 67 (10), 66 (18), 65 (20), 64 (14), 63 (21), 51 (16), 50 (13), 39 (16), 30 (34). **HRMS** (EI, m/z) calcd. for C<sub>8</sub>H<sub>11</sub>NO (M)<sup>+</sup> 137.0835; found 137.0831.

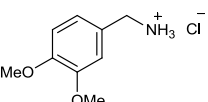 **(3,4-dimethoxyphenyl)methan ammonium chloride (2i).** **<sup>1</sup>H NMR** (300.1 MHz, DMSO-d<sub>6</sub>): δ = 3.66 (d, *J* = 6.0 Hz, 6 H), 3.77-3.86 (m, 2 H), 6.81-6.94 (m, 2 H), 7.13-7.18 (m, 1 H), 8.39 (s, 3 H). **<sup>13</sup>C NMR** (75.5 MHz, DMSO-d<sub>6</sub>) δ = 30.8, 42.1, 44.7, 55.6, 111.6, 113.0, 121.5, 126.4, 148.7, 148.9. **GCMS-EI** (70eV): m/z (%) = 167 (M<sup>+</sup>, 53), 166 (46), 152 (14), 151 (27), 150 (11), 139 (10), 137 (14), 136 (100), 124 (23), 121 (11), 109 (13), 107 (17), 93 (11), 92 (16), 80 (18), 79 (17), 77 (14), 65 (15), 53 (10), 51 (15), 30 (16). **HRMS** (EI, m/z) calcd. for C<sub>9</sub>H<sub>13</sub>NO<sub>2</sub> (M)<sup>+</sup> 167.0941; found 167.0942.

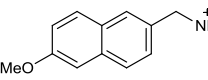 **(6-methoxynaphthalen-2-yl)methan ammonium chloride (2j).** **<sup>1</sup>H NMR** (300.1 MHz, DMSO-d<sub>6</sub>): δ = 3.76 (s, 3 H), 4.00 (s, 2 H), 7.08 (dd, *J* = 9.2 Hz, 1 H), 7.20-7.26 (m, 1 H), 7.50 (dd, *J* = 8.5 Hz, 1 H), 7.65-7.78 (m, 2 H), 7.81 (s, 1 H), 8.53 (s, 3 H). **<sup>13</sup>C NMR** (75.5 MHz, DMSO-d<sub>6</sub>) δ = 42.4, 55.3, 105.9, 119.2, 127.1, 127.2, 128.0, 128.0, 129.2, 129.4, 139.1, 157.7. **GCMS-EI** (70eV): m/z (%) = 188 (11), 187 (M<sup>+</sup>, 91), 186 (100), 172 (12), 171 (32), 159 (17), 156 (15), 144 (29), 143 (13), 128 (27), 127 (17), 116 (14), 115 (39), 114 (13). **HRMS** (EI, m/z) calcd. for C<sub>12</sub>H<sub>13</sub>NO (M)<sup>+</sup> 187.0992; found 187.0993.

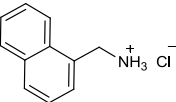 **naphthalen-1-ylmethan ammonium chloride (2k).** **<sup>1</sup>H NMR** (300.1 MHz, DMSO-d<sub>6</sub>): δ = 4.44 (m, 2 H), 7.40-7.62 (m, 4 H), 7.84-7.94 (m, 2 H), 8.02-8.09 (m, 1 H), 8.59 (s, 3 H). **<sup>13</sup>C NMR** (75.5 MHz, DMSO-d<sub>6</sub>) δ = 39.1 (peak from DEPT spectrum), 123.4, 125.3, 126.2, 126.7, 127.2, 128.6, 129.0, 129.9, 130.6, 133.1. **GCMS-EI** (70eV): m/z (%) = 157 (M<sup>+</sup>, 80), 156 (100), 129 (52), 128 (46), 127 (32), 126 (14), 115 (15), 77 (13), 30 (10). **HRMS** (EI, m/z) calcd. for C<sub>11</sub>H<sub>10</sub>N (M-H)<sup>+</sup> 156.0808; found 156.0805.

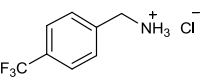 **(4-(trifluoromethyl)phenyl)methan ammonium chloride (2l).** **<sup>1</sup>H NMR** (300.1 MHz, DMSO-d<sub>6</sub>): δ = 4.06 (s, 2 H), 7.64-7.80 (m, 4 H), 8.69 (s, 3 H). **<sup>13</sup>C NMR** (75.5 MHz, DMSO-d<sub>6</sub>) δ = 41.7, 124.2 (q, *J* = 273 Hz),

125.4 (q,  $J = 3.6$  Hz), 128.9 (q,  $J = 32$  Hz), 129.8, 138.8. **GCMS-EI** (70eV):  $m/z$  (%) = 175 ( $M^+$ , 51), 174 (100), 156 (20), 145 (11), 127 (45), 106 (58), 77 (11), 75 (11), 50 (10), 30 (27). **HRMS** (ESI-TOF,  $m/z$ ) calcd. for  $C_8H_8F_3N$  ( $M+H$ )<sup>+</sup> 176.0682; found 176.0680.

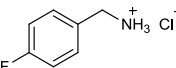 **(4-fluorophenyl)methan ammonium chloride (2m).** **<sup>1</sup>H NMR** (300.1 MHz, DMSO- $d_6$ ):  $\delta = 3.91$  (s, 2 H), 7.10-7.25 (m, 2 H), 7.45-7.57 (m, 2 H), 8.56 (s, 3 H). **<sup>13</sup>C NMR** (75.5 MHz, DMSO- $d_6$ ):  $\delta = 41.4$ , 115.4 (d,  $J = 10.4$  Hz), 130.5 (d,  $J = 3.1$  Hz), 131.4 (d,  $J = 8.4$  Hz), 162.1 (d,  $J = 122.0$  Hz). **GCMS-EI** (70eV):  $m/z$  (%) = 125 ( $M^+$ , 32), 124 (100), 109 (26), 105 (45), 97 (36), 96 (13), 95 (15), 83 (11), 77 (14), 75 (21), 51 (12), 50 (14), 30 (24). **HRMS** (ESI-TOF,  $m/z$ ) calcd. for  $C_7H_8FN$  ( $M+H$ )<sup>+</sup> 126.0714; found 126.0712.

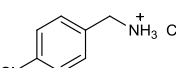 **(4-chlorophenyl)methan ammonium chloride (2n).** **<sup>1</sup>H NMR** (300.1 MHz, DMSO- $d_6$ ):  $\delta = 3.92$  (s, 2 H), 7.34-7.94 (m, 4 H), 8.46 (s, 3 H). **<sup>13</sup>C NMR** (75.5 MHz, DMSO- $d_6$ ):  $\delta = 41.5$ , 128.6, 131.1, 133.1, 133.2. **GCMS-EI** (70eV):  $m/z$  (%) = 142 (15), 141 ( $M^+$ , 11), 140 (47), 125 (11), 106 (100), 89 (12), 79 (12), 78 (11), 77 (33), 75 (19), 74 (12), 51 (16), 50 (17), 30 (23). **HRMS** (EI,  $m/z$ ) calcd. for  $C_7H_7ClN$  ( $R=NH_2$ )<sup>+</sup> 140.0262; found 140.0263.

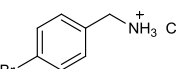 **(4-bromophenyl)methan ammonium chloride (2o).** **<sup>1</sup>H NMR** (300.1 MHz, DMSO- $d_6$ ):  $\delta = 3.91$  (s, 2 H), 7.37-7.44 (m, 2 H), 7.49-7.56 (m, 2 H), 8.58 (s, 3 H). **<sup>13</sup>C NMR** (75.5 MHz, DMSO- $d_6$ ):  $\delta = 41.4$ , 121.7, 131.3, 131.4, 133.6. **GCMS-EI** (70eV):  $m/z$  (%) = 186 (22), 184 ( $M^+$ , 23), 106 (100), 89 (10), 79 (14), 78 (15), 77 (23), 75 (10), 51 (12), 50 (16), 30 (17). **HRMS** (ESI-TOF,  $m/z$ ) calcd. for  $C_7H_8BrN$  ( $M+H$ )<sup>+</sup> 185.9913; found 185.9913.

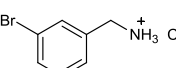 **(3-bromophenyl)methan ammonium chloride (2p).** **<sup>1</sup>H NMR** (300.1 MHz,  $D_2O$ ):  $\delta = 4.16$  (s, 2 H), 7.31-7.44 (m, 2 H), 7.56-7.69 (m, 2 H). **<sup>13</sup>C NMR** (75.5 MHz,  $D_2O$ ):  $\delta = 42.4$ , 122.2, 127.6, 130.8, 131.6, 132.1, 134.7. **GCMS-EI** (70eV):  $m/z$  (%) = 186 (23), 184 ( $M^+$ , 24), 106 (100), 79 (13), 78 (12), 77 (22), 50 (10), 30 (13). **HRMS** (ESI-TOF,  $m/z$ ) calcd. for  $C_7H_8BrN$  ( $M+H$ )<sup>+</sup> 185.9913; found 185.9913.

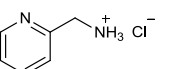 **pyridin-2-ylmethan ammonium chloride (welches substrat?) (2q).** **<sup>1</sup>H NMR** (300.1 MHz,  $D_2O$ )  $\delta = 4.50$  (s, 2 H), 7.76-7.90 (m, 2 H), (tt,  $J = 7.9$  Hz,  $J = 7.9$  Hz, 1 H), 8.73 (dd,  $J = 5.6$  Hz, 1 H). **<sup>13</sup>C NMR** (75.5 MHz, DMSO- $d_6$ )  $\delta = 41.0$ , 124.8, 124.9, 141.2, 145.7, 151.4. **HRMS** (ESI-TOF,  $m/z$ ) calcd. for  $C_7H_8BrN$  ( $M+H$ )<sup>+</sup> 109.0760; found 109.0763.

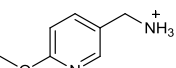 **(6-methoxypyridin-3-yl)methan ammonium chloride (2r).** **<sup>1</sup>H NMR** (300.1 MHz,  $D_2O$ )  $\delta = 4.18$  (s, 3 H), 4.30 (s, 2 H), 7.49 (d,  $J = 9.0$  Hz, 1 H), 8.32-8.50 (m, 2 H). **<sup>13</sup>C NMR** (75.5 MHz,  $D_2O$ )  $\delta = 39.1$ , 57.8, 111.4, 123.2, 140.3, 148.2, 161.8. **GCMS-EI** (70eV):  $m/z$  (%) = 138 ( $M^+$ , 52), 137 (65), 122 (15), 110 (100), 108 (11), 106 (11), 80 (10), 78 (16), 67 (10), 53 (11), 52 (10), 51 (10), 42 (13), 30 (12). **HRMS** (EI,  $m/z$ ) calcd. for  $C_7H_{10}NO$  ( $M$ )<sup>+</sup> 138.0788; found 138.0786.

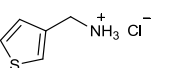 **thiophen-3-ylmethan ammonium chloride (2t).** **<sup>1</sup>H NMR** (300.1 MHz,  $D_2O$ )  $\delta = 3.98$  (s, 2 H), 7.25 (dd,  $J = 5.0$  Hz, 1 H), 7.54-7.58 (m, 1 H), 7.58-7.63 (m, 1 H), 8.46 (s, 3 H). **<sup>13</sup>C NMR** (75.5 MHz,  $D_2O$ )  $\delta = 37.3$ , 125.1, 127.0, 128.1, 134.8. **GCMS-EI** (70eV):  $m/z$  (%) = 114 (19), 113 ( $M^+$ , 100), 112 (79), 97 (30), 85 (52), 69 (13), 45 (20), 39 (13), 38 (10), 36 (20). **HRMS** (EI,  $m/z$ ) calcd. for  $C_5H_7NS$  ( $M$ )<sup>+</sup> 113.0294; found 113.0290.

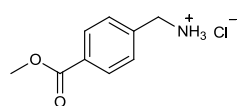

**(4-(methoxycarbonyl)phenyl)methan ammonium chloride (2u).**  $^1\text{H NMR}$  (300.1 MHz,  $\text{D}_2\text{O}$ ),  $\delta = 3.91$  (s, 3H), 4.25 (s, 2H), 7.48-7.60 (m, 2H), 7.98-8.11 (m, 2H) (10% *iso*-propylester present in NMR, signals are not assigned here).  $^{13}\text{C NMR}$  (75.5 MHz,  $\text{D}_2\text{O}$ ):  $\delta = 42.6, 52.7, 128.8, 130.0, 137.8, 168.7$ .

NMR shows also *iso*-propylester signals not assigned here. **GCMS-EI** (70eV):  $m/z$  (%) = 165 ( $\text{M}^+$ , 7), 164 (33), 150 (27), 134 (29), 133 (68), 132 (21), 106 (100), 105 (57), 104 (22), 91 (11), 89 (17), 79 (18), 77 (33), 36 (15). **HRMS** (EI,  $m/z$ ) calcd. for  $\text{C}_9\text{H}_{11}\text{NO}_2$  ( $\text{R}=\text{NH}_2$ ) $^+$  164.0706; found 164.0708.

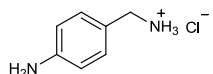

**(4-aminophenyl)methan ammonium chloride (2v).**  $^1\text{H NMR}$  (300.1 MHz,  $\text{D}_2\text{O}$ ),  $\delta = 4.22$  (s, 2 H), 7.42-7.48 (m, 2H), 7.54-7.61 (m, 2H).  $^{13}\text{C NMR}$  (75.5 MHz,  $\text{D}_2\text{O}$ ):  $\delta = 42.3, 123.6, 130.6, 130.9, 133.5$ .

**GCMS-EI** (70eV):  $m/z$  (%) = 122 ( $\text{M}^+$ , 89), 121 (100), 16 (68), 94 (40), 93 (14), 78 (16), 77 (22), 65 (10), 63 (15), 36 (16).

**HRMS** (EI,  $m/z$ ) calcd. for  $\text{C}_7\text{H}_{10}\text{BrN}$  ( $\text{M}$ ) $^+$  122.0839; found 122.0835.

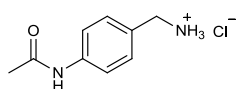

**(4-acetamidophenyl)methan ammonium chloride (2w).**  $^{78}\text{H NMR}$  (300.1 MHz,  $\text{D}_2\text{O}$ ),  $\delta = 2.14$  (s, 3 H), 4.14 (s, 2 H), 7.40-7.48 (m, 4 H).  $^{13}\text{C NMR}$  (75.5 MHz,  $\text{D}_2\text{O}$ ):  $\delta = 22.8, 42.6, 122.2, 129.3, 129.7,$

137.6, 173.0.

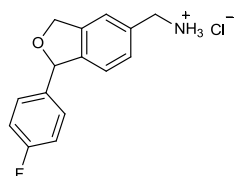

**(1-(4-fluorophenyl)-1,3-dihydroisobenzofuran-5-yl)methan ammonium chloride (2x).**  $^1\text{H NMR}$  (300.1 MHz, MeOD),  $\delta = 4.14$  (s, 2 H), 5.09-5.23 (m, 1 H), 5.24-5.39 (m, 1 H), 6.16 (s, 1H), 6.97-7.13 (m, 3 H), 7.27-7.48 (m, 4 H).  $^{13}\text{C NMR}$  (75.5 MHz, MeOD):  $\delta = 44.1, 73.8, 86.5, 116.3$  (d,  $J = 22.0$  Hz), 123.0, 124.0, 129.7, 129.86 (d,  $J = 8.1$  Hz), 134.4, 139.5 (d,  $J = 3.3$  Hz), 141.5, 144.4, 164.0 (d,  $J = 122.5$  Hz).

**HRMS** (EI,  $m/z$ ) calcd. for  $\text{C}_{15}\text{H}_{13}\text{ONF}$  ( $\text{R}=\text{NH}_2$ ) $^+$  242.0976; found 242.0971.

### aliphatic products 5:

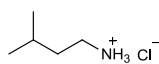

**3-methylbutan-1-ammonium chloride (8a).**  $^1\text{H NMR}$  (300.1 MHz,  $\text{DMSO-d}_6$ ),  $\delta = 0.77$  (d,  $J = 6.8$  Hz, 6 H), 1.30-1.41 (m, 2 H), 1.45-1.61 (m, 1 H), 2.58-2.72 (m, 2 H), 7.97 (s, 3 H).  $^{13}\text{C NMR}$  (75.5 MHz,  $\text{DMSO-d}_6$ ):  $\delta = 22.2, 25.1, 35.8, 37.2$ .

**GCMS-EI** (70eV):  $m/z$  (%) = 87 ( $\text{M}^+$ , 3), 70 (6), 55 (4), 44 (6), 42 (6), 41 (10), 39 (10), 30 (100). **HRMS** (ESI-TOF,  $m/z$ ) calcd. for  $\text{C}_5\text{H}_{13}\text{rN}$  ( $\text{M}+\text{H}$ ) $^+$  88.1121; found 88.1125.

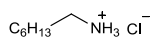

**heptan-1-ammonium chloride (8c).**  $^1\text{H NMR}$  (300.1 MHz,  $\text{DMSO-d}_6$ ),  $\delta = 0.71$ -0.82 (m, 3 H), 1.08-1.27 (m, 8 H), 1.38-1.54 (m, 2 H), 2.54-2.70 (m, 2 H), 7.99 (s, 3 H).  $^{13}\text{C NMR}$  (75.5 MHz,  $\text{DMSO-d}_6$ ):  $\delta = 14.0, 22.0, 25.9, 27.0, 28.3, 31.1, 38.7$ . **GCMS-EI** (70eV):  $m/z$  (%) = 115 ( $\text{M}^+$ , 1), 86 (3), 56 (4), 55 (5), 45 (5), 44 (7), 43 (6), 42 (6), 41 (14), 39 (9), 30 (100), 29 (10). **HRMS** (ESI-TOF,  $m/z$ ) calcd. for  $\text{C}_7\text{H}_{17}\text{BrN}$  ( $\text{M}+\text{H}$ ) $^+$  116.1434; found 116.1438.

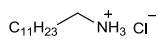

**dodecan-1-ammonium chloride (8d).**  $^1\text{H NMR}$  (300.1 MHz,  $\text{DMSO-d}_6$ ),  $\delta = 0.71$ -0.81 (m, 3 H), 1.08-1.23 (m, 18 H), 1.38-1.53 (m, 2 H), 2.56-2.71 (m, 2 H), 7.96 (s, 3 H).  $^{13}\text{C NMR}$  (75.5 MHz,  $\text{DMSO-d}_6$ ):  $\delta = 14.0, 22.1, 25.9, 27.0, 28.6, 28.8, 28.9, 29.0, 29.1, 29.1, 31.4, 38.8$ . **GCMS-EI** (70eV):  $m/z$  (%) = 185 ( $\text{M}^+$ , 1), 100 (4), 86 (7), 69 (5), 57 (4), 56 (8), 55 (12), 45 (9), 44 (12), 43 (15), 42 (6), 41 (245), 39 (7), 30 (100), 29 (11). **HRMS** (ESI-TOF,  $m/z$ ) calcd. for  $\text{C}_{12}\text{H}_{27}\text{N}$  ( $\text{M}+\text{H}$ ) $^+$  186.2216; found 186.2216.

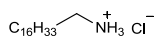

**heptadecan-1-ammonium chloride (8e).**  $^1\text{H NMR}$  (300.1 MHz, MeOD),  $\delta = 0.84$ -0.94 (m, 3 H), 1.22-1.44 (m, 28 H), 1.57-1.71 (m, 2 H), 2.86-2.94 (m, 2 H).  $^{13}\text{C NMR}$  (75.5 MHz, MeOD):  $\delta = 14.5, 23.7, 27.5, 28.6, 30.2, 30.5, 30.5,$



30.7, 30.8 (big peak), 33.1, 40.8. **GCMS-EI** (70eV):  $m/z$  (%) = 255 ( $M^+$ , 2), 100 (4), 86 (8), 83 (4), 72 (4), 57 (8), 56 (8), 55 (16), 45 (8), 44 (18), 43 (21), 42 (6), 41 (21), 39 (4), 30 (100), 29 (9). **HRMS** (ESI-TOF,  $m/z$ ) calcd. for  $C_{17}H_{37}N$  ( $M+H$ )<sup>+</sup> 256.2999; found 256.2999.

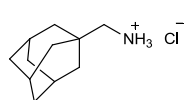

**adamantan-1-ylmethan ammonium chloride (8f)**. **<sup>1</sup>H NMR** (300.1 MHz, DMSO- $d_6$ ),  $\delta$  = 1.39-1.65 (m, 12 H), 1.83-1.91 (m, 3 H), 2.34-2.40, 7.91 (s, 3 H). **<sup>13</sup>C NMR** (75.5 MHz, DMSO- $d_6$ ):  $\delta$  = 27.4, 31.6, 36.1, 38.9, 49.9. **GCMS-EI** (70eV):  $m/z$  (%) = 165 ( $M^+$ , 23), 136 (11), 135 (100), 107 (12), 93 (25), 91 (14), 79 (31), 77 (14), 30 (19). **HRMS** (ESI-TOF,  $m/z$ ) calcd. for  $C_{11}H_{19}N$  ( $M+H$ )<sup>+</sup> 166.1590; found 166.1590.

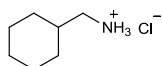

**cyclohexylmethan ammonium chloride (8g)**. **<sup>1</sup>H NMR** (300.1 MHz, DMSO- $d_6$ ),  $\delta$  = 0.74-0.92 (m, 2 H), 0.96-1.20 (m, 3 H), 1.42-1.74 (m, 6 H), 2.46-2.60 (m, 2 H), 8.09 (s, 3 H). **<sup>13</sup>C NMR** (75.5 MHz, DMSO- $d_6$ ):  $\delta$  = 25.1, 25.7, 29.8, 35.4, 44.4. **HRMS** (ESI-TOF,  $m/z$ ) calcd. for  $C_7H_{15}N$  ( $M+H$ )<sup>+</sup> 114.1277; found 114.1278.

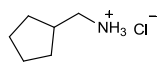

**cyclopentylmethan ammonium chloride (8h)**. **<sup>1</sup>H NMR** (300.1 MHz, DMSO- $d_6$ ),  $\delta$  = 1.03-1.22 (m, 2 H), 1.34-1.57 (m, 4 H), 1.59-1.72 (m, 2 H), 1.93-2.09 (m, 1 H), 2.56-2.69 (m, 2 H), 7.99 (s, 3 H). **<sup>13</sup>C NMR** (75.5 MHz, DMSO- $d_6$ ):  $\delta$  = 24.7, 29.9, 37.6, 40.4, 43.6. **GCMS-EI** (70eV):  $m/z$  (%) = 99 ( $M^+$ , 7), 67 (9), 56 (9), 41 (16), 39 (18), 32 (6), 30 (100). **HRMS** (ESI-TOF,  $m/z$ ) calcd. for  $C_6H_{13}N$  ( $M+H$ )<sup>+</sup> 100.1121; found 100.1124.

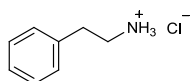

**2-phenylethan ammonium chloride (8i)**. **<sup>1</sup>H NMR** (300.1 MHz, DMSO- $d_6$ ),  $\delta$  = 2.72-2.95 (m, 4 H), 7.06-7.24 (m, 5 H), 8.14 (s, 3 H). **<sup>13</sup>C NMR** (75.5 MHz, DMSO- $d_6$ ):  $\delta$  = 33.0, 39.8, 126.7, 128.7, 128.7, 137.5. **GCMS-EI** (70eV):  $m/z$  (%) = 121 ( $M^+$ , 6), 92 (11), 91 (37), 89 (7), 65 (22), 63 (10), 51 (12), 50 (7), 39 (13), 30 (100). **HRMS** (ESI-TOF,  $m/z$ ) calcd. for  $C_8H_{11}N$  ( $M+H$ )<sup>+</sup> 122.0964; found 122.0963.

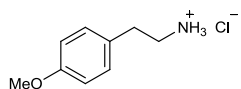

**2-(4-methoxyphenyl)ethan ammonium chloride (8j)**. **<sup>1</sup>H NMR** (300.1 MHz,  $D_2O$ ),  $\delta$  = 2.93 (t,  $J$  = 7.4 Hz,  $J$  = 7.4 Hz, 2 H), 3.23 (t,  $J$  = 7.4 Hz,  $J$  = 7.4 Hz, 2 H), 3.80 (s, 3 H), 6.94-7.02 (m, 2 H), 7.21-7.30 (m, 2 H). **<sup>13</sup>C NMR** (75.5 MHz,  $D_2O$ ):  $\delta$  = 31.8, 40.7, 55.3, 114.4, 129.1, 130.1, 157.9. **GCMS-EI** (70eV):  $m/z$  (%) = 151 ( $M^+$ , 4), 123 (8), 122 (100), 121 (63), 107 (9), 91 (15), 89 (7), 79 (7), 78 (27), 77 (23), 65 (7), 52 (9), 51 (11), 39 (6), 30 (56). **HRMS** (ESI-TOF,  $m/z$ ) calcd. for  $C_9H_{13}NO$  ( $M+H$ )<sup>+</sup> 152.1070; found 152.1068.

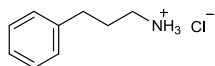

**3-phenylpropan-1-ammonium chloride (8k)**. **<sup>1</sup>H NMR** (300.1 MHz, DMSO- $d_6$ ),  $\delta$  = 1.69-1.82 (m, 2 H), 2.53 (t,  $J$  = 7.7 Hz,  $J$  = 7.7 Hz, 2 H), 2.57-2.70 (m, 2 H), 7.03-7.13 (m, 3 H), 7.14-7.22 (m, 2 H), 8.06 (s, 3 H). **<sup>13</sup>C NMR** (75.5 MHz, DMSO- $d_6$ ):  $\delta$  = 28.8, 31.9, 38.3, 126.1, 128.3, 128.5, 141.0. **GCMS-EI** (70eV):  $m/z$  (%) = 135 ( $M^+$ , 4), 119 (9), 118 (100), 117 (62), 115 (7), 104 (11), 103 (15), 92 (14), 91 (47), 79 (10), 78 (17), 77 (25), 65 (21), 63 (11), 51 (21), 50 (10), 39 (15), 30 (98). **HRMS** (ESI-TOF,  $m/z$ ) calcd. for  $C_9H_{13}N$  ( $M+H$ )<sup>+</sup> 136.1121; found 136.1124.

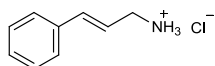

**(E)-3-phenylprop-2-en-1-ammonium chloride (8l)**. **<sup>1</sup>H NMR** (300.1 MHz, DMSO- $d_6$ ),  $\delta$  = 3.42-3.54 (m, 2 H), 6.13-6.27 (m, 1 H), 6.57-6.94 (m, 1 H), 7.08-7.37 (m, 5 H), 8.26 (s, 3 H). **<sup>13</sup>C NMR** (75.5 MHz, DMSO- $d_6$ ):  $\delta$  = 40.6, 122.1, 126.5, 128.3, 128.9, 134.4, 135.8. **GCMS-EI** (70eV):  $m/z$  (%) = 133 ( $M^+$ , 100), 132 (82), 130 (12), 117 (18), 116 (16), 115 (50), 91 (14), 78 (17), 77 (15), 63 (17), 56 (21), 51 (10), 36 (15). **HRMS** (ESI-TOF,  $m/z$ ) calcd. for  $C_9H_{13}N$  ( $M+H$ )<sup>+</sup> 136.1121; found 136.1124.

## diamine products 7:

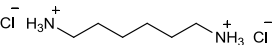 **hexane-1,6-diammonium chloride (10a).**  $^1\text{H NMR}$  (300.1 MHz, DMSO- $d_6$ ),  $\delta$  = 1.19-1.29 (m, 4 H), 1.48 (p,  $J$  = 7.2 Hz,  $J$  = 7.2 Hz,  $J$  = 7.2 Hz,  $J$  = 7.2 Hz,  $J$  = 7.2 Hz, 4 H), 2.62-2.75 (m, 4 H), 7.90 (s, 6 H).  $^{13}\text{C NMR}$  (75.5 MHz, DMSO- $d_6$ ):  $\delta$  = 25.4, 26.8, 38.6. **GCMS-EI** (70eV):  $m/z$  (%) = 117 ( $[\text{M}+\text{H}]^+$ , 2), 87 (15), 56 (20), 30 (100). **HRMS** (ESI-TOF,  $m/z$ ) calcd. for  $\text{C}_6\text{H}_{16}\text{N}_2$  ( $\text{M}+\text{H}$ ) $^+$  117.1386; found 117.1390.

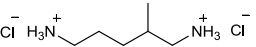 **2-methylpentane-1,5-diammonium chloride (10b).**  $^1\text{H NMR}$  (300.1 MHz,  $\text{D}_2\text{O}$ ),  $\delta$  = 0.97 (d,  $J$  = 6.4 Hz, 3 H), 1.12-1.28 (m, 1 H), 1.64-1.77 (m, 1 H), 1.80-1.96 (m, 3 H), 2.57-2.67 (m, 1 H), 2.84-2.94 (m, 1 H), 3.27-3.40 (m, 2 H).  $^{13}\text{C NMR}$  (75.5 MHz, MeOD):  $\delta$  = 19.0, 23.4, 30.0, 31.7, 45.1, 51.2.

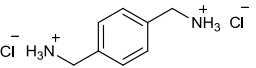 **1,4-phenylenedimethan ammonium chloride (10c).**  $^1\text{H NMR}$  (300.1 MHz,  $\text{D}_2\text{O}$ ),  $\delta$  = 4.20 (s, 4 H), 7.51 (s, 4 H), 7.62-7.67 (m, 2 H), 7.96-8.03 (m, 2 H).  $^{13}\text{C NMR}$  (75.5 MHz,  $\text{D}_2\text{O}$ ):  $\delta$  = 42.6, 129.5, 133.4, 195.8. **GCMS-EI** (70eV):  $m/z$  (%) = 135 ( $\text{M}^+$ , 10), 118 (40), 106 (100), 91 (45), 79 (28), 51 (8).

### 3. Supplementary References

- 71 Perdew, J. P., Density-functional approximation for the correlation energy of the inhomogeneous electron gas. *Phys. Rev. B*, **33**, 8822-8824 (1996).
- 72 Schaefer, A., Huber, C., Ahlrichs, R., Fully optimized contracted gaussian basis sets of triple zeta valence quality for atoms Li to Kr. *J. Chem. Phys.*, **100**, 5829-5835 (1994).
- 73 Frisch, J. *et al.*, Gaussian 09, Revision C.01, Gaussian, Inc., Wallingford CT, 2010.
- 74 Conzález-Blanco, O., Branchadell, V., Density functional study of the Fe–CO bond dissociation energies of Fe(CO)<sub>5</sub>. *J. Chem. Phys.*, **110**, 778-783 (1999).
- 75 Li, Q., Li, Y.-N., Wang, T., Wang, S., Huo, C.-F., Li, Y.-W., Wang, J., Jiao, H., Electronic Structures and Energies of Fe<sub>2</sub>(CO)<sub>n</sub> (n = 0–9). *ChemPhysChem*, **14**, 1573-1576 (2013).
- 76 a) Gaussian NBO Program, 3.1, E. D. Glendening, Reed, A. E., Carpenter, J. E., Weinhold, F., b) Reed, A. E., Curtiss, L.A., Weinhold, F., Intermolecular interactions from a natural bond orbital, donor-acceptor viewpoint. *Chem. Rev.*, **88**, 899 (1988).
- 77 Lu, X., Rodríguez, M., Gu, W., Silverman, R. B., Inactivation of mitochondrial monoamine oxidase B by methylthio-substituted benzylamines. *Bioorganic & Medicinal Chemistry*, **11**, 4423-4430, (2003).
- 78 Robins, M. J., Peng, Y., Damaraju, V. L., Mowles, D., Barron, G., Tackaberry, T., Young, J. D., Cass, C. E., Improved Syntheses of 5'-S-(2-Aminoethyl)-6-N-(4-nitrobenzyl)-5'-thioadenosine (SAENTA), Analogues, and Fluorescent Probe Conjugates: Analysis of Cell-Surface Human Equilibrative Nucleoside Transporter 1 (hENT1) Levels for Prediction of the Antitumor Efficacy of Gemcitabine. *J. Med. Chem.*, **53**, 6040-6053, (2010).
